# Supplementary material
Source: PubMed Central journal article supplement (PMC4287070)
Supplement: ymi-09-0110-s001.pdf [file ymi-09-0110-s001.pdf]

A complete list of literature found for the article: A frame of reference for research and development of health related GIS by Anders Knørr Lyseen, Esben Munk Sørensen, Christian Nøhr.

- Abbott, R.M.a b. «Geographic analysis of ambulance availability in Arkansas». *Family and Community Health* 31, nr. 1 (2008): 35-43.
- Abdel-Rahman, M.S.a, M.M.a El-Bahy, J.B.b Malone, R.A.b Thompson, og N.M.c El Bahy. «Geographic information systems as a tool for control program management for schistosomiasis in Egypt». *Acta Tropica* 79, nr. 1 (2001): 49-57.
- Abdul Rasam, A.R.a, A.M.a Mohd Noor, N.b Ahmad, og R.a Ghazali. «MyGeoHealth: GIS-based cholera transmission risk system in Sabah, Malaysia». I *Proceedings - 2011 IEEE 7th International Colloquium on Signal Processing and Its Applications, CSPA 2011*, 474-479, 2011. <http://www.scopus.com/inward/record.url?eid=2-s2.0-79957473361&partnerID=40&md5=8f01b0927fc0b41151af849a8c53df3a>.
- Abellan, J.J.a b, S.c Richardson, og N.c Best. «Use of space time models to investigate the stability of patterns of disease». *Environmental Health Perspectives* 116, nr. 8 (2008): 1111-1119.
- Acharya, A. B., J. C. Nyirenda, G. B. Higgs, M. S. Bloomfield, S. Cruz-Flores, L. T. Connor, J. M. Lee, og T. L. Leet. «Distance From Home to Hospital and Thrombolytic Utilization for Acute Ischemic Stroke». *Journal of Stroke and Cerebrovascular Diseases* 20, nr. 4 (2011): 295-301.
- Acharya, A.B.a, J.C.b Nyirenda, G.B.b Higgs, M.S.c Bloomfield, S.a Cruz-Flores, L.T.d e Connor, J.-M.e Lee, og T.L.c Leet. «Distance from home to hospital and thrombolytic utilization for acute ischemic stroke». *Journal of Stroke and Cerebrovascular Diseases* 20, nr. 4 (2011): 295-301.
- Achee, N.L.a, J.P.a Grieco, P.a Masuoka, R.G.a Andre, D.R.a Roberts, J.a Thomas, I.b Briceno, R.b King, og E.c Rejmankova. «Use of remote sensing and geographic information systems to predict locations of Anopheles darlingi-positive breeding sites within the Sibun River in Belize, Central America». *Journal of Medical Entomology* 43, nr. 2 (2006): 382-392.
- Agarwal, P. K., R. Bowman, og P. Courtright. «Child eye health tertiary facilities in Africa». *Journal of American Association for Pediatric Ophthalmology and Strabismus* 14, nr. 3 (2010): 263-266.
- Agarwal, P.K.a, R.b c Bowman, og P.d Courtright. «Child eye health tertiary facilities in Africa». *Journal of AAPOS* 14, nr. 3 (2010): 263-266.
- Ageep, T.B.a, J.b Cox, M.M.a Hassan, B.G.c g Knols, M.Q.d Benedict, C.A.e Malcolm, A.f Babiker, og B.B.a El Sayed. «Spatial and temporal distribution of the malaria mosquito Anopheles arabiensis in northern Sudan: Influence of environmental factors and implications for vector control». *Malaria Journal* 8, nr. 1 (2009). <http://www.scopus.com/inward/record.url?eid=2-s2.0-67650727599&partnerID=40&md5=0f78c5b8ba576195967a8417d13d169d>.
- Ahmad, R.a, W.N.W.M.a Ali, Z.M.b Nor, Z.a Ismail, A.A.a Hadi, M.N.a Ibrahim, og L.H.a Lim. «Mapping of mosquito breeding sites in malaria endemic areas in Pos Lenjang, Kuala Lipis, Pahang, Malaysia». *Malaria Journal* 10 (2011). <http://www.scopus.com/inward/record.url?eid=2-s2.0-83255171102&partnerID=40&md5=9168c2c534b2b7dlaba6be6435cab4d4>.
- Ajjampur, S.S.R.a, B.P.b Gladstone, D.b Selvapandian, J.P.b Muliylil, H.c Ward, og G.a Kang. «Molecular and spatial epidemiology of cryptosporidiosis in children in a semiurban community in South India». *Journal of Clinical Microbiology* 45, nr. 3 (2007): 915-920.
- Albrecht, J., og L. Ramasubramanian. «The moving target: A geographic index of relative wellbeing». *Journal of Medical Systems* 28, nr. 4 (2004): 371-384.
- Albrecht, J.a, og L.b Ramasubramanian. «The moving target: A geographic index of relative wellbeing». *Journal of Medical Systems* 28, nr. 4 (2004): 371-384.
- Alcaraz, K. I., M. W. Kreuter, og R. P. Bryan. «Use of GIS to identify optimal settings for cancer prevention and control in African American communities». *Preventive medicine* 49, nr. 1 (2009): 54.

Alcaraz, K.I.a, M.W.a Kreuter, og R.P.b Bryan. «Use of GIS to identify optimal settings for cancer prevention and control in African American communities». *Preventive Medicine* 49, nr. 1 (2009): 54-57.

Ali, M., M. Emch, J. P. Donnay, M. Yunus, og R. B. Sack. «Identifying environmental risk factors for endemic cholera: a raster GIS approach». *Health & place* 8, nr. 3 (2002): 201-210.

Alkoy, S.a, N.b Ulugtekin, og A.O.b Dogru. «Monitoring vaccination coverage in Istanbul using the lot quality assurance sampling and geographic information system». *Journal of International Medical Research* 35, nr. 2 (2007): 242-252.

Allen, T. R., og D. W. Wong. «Exploring GIS, spatial statistics and remote sensing for risk assessment of vector-borne diseases: a West Nile virus example». *International Journal of Risk Assessment and Management* 6, nr. 4 (2006): 253-275.

Al-Shorbaji, N. «WHO EMRO's approach for supporting e-health in the Eastern Mediterranean Region». *Eastern Mediterranean Health Journal* 12, nr. SUPPL. 2 (2006): S238-S252.

Altobelli, A.a, B.a Boemo, K.a Mignozzi, M.b Bandi, R.b Floris, G.b Menardi, og M.b Cinco. «Spatial Lyme borreliosis risk assessment in north-eastern Italy». *International Journal of Medical Microbiology* 298, nr. SUPPL. 1 (2008): 125-128.

Al-Zaher, A. «Primary health care centers in Al Jahra Governorate - Kuwait: A spatial analysis». *Journal of the Social Sciences* 32, nr. 3 (2004): 661-699.

Anderson, E.C. «A malaria information system for prediction and monitoring of epidemics». I 54th International Astronautical Congress of the International Astronautical Federation (IAF), the International Academy of Astronautics and the International Institute of Space Law, 1:1185-1195, 2003. <http://www.scopus.com/inward/record.url?eid=2-s2.0-22344433454&partnerID=40&md5=a20d0b855925e7ca13c3de715d369fdc>.

Andersson, T.a, S.b Petersson, og P.a Vörbrand. «Calculating the preparedness for an efficient ambulance health care». I IEEE Conference on Intelligent Transportation Systems, Proceedings, ITSC, 785-790, 2004. <http://www.scopus.com/inward/record.url?eid=2-s2.0-13344250420&partnerID=40&md5=268bf116100e846d426bc9aaeda5d778>.

Andrianasolo, Haja H., Kanchana Nakhapakorn, og Jean-Paul Gonzalez. «Remote sensing and GIS modelling applied to viral disease in Nakhonpathom Province, Thailand». I International Geoscience and Remote Sensing Symposium (IGARSS), 5:1996-1998, 2000. <http://www.scopus.com/inward/record.url?eid=2-s2.0-0034543999&partnerID=40&md5=5ff09e660ccd8d190a0c629e6a4751a9>.

Anjaneyulu, Y.a, I.b Jayakumar, V.b Hima Bindu, G.b Sagareswar, P.V.b Mukunda Rao, N.b Rambabu, og K.V.c Ramani. «Use of multi-objective air pollution monitoring sites and online air pollution monitoring system for total health risk assessment in Hyderabad, India». *International Journal of Environmental Research and Public Health* 2, nr. 2 (2005): 343-354.

Aparicio, C., og M.D. Bitencourt. «Spatial modeling of cutaneous leishmaniasis risk zones [Modelagem espacial de zonas de risco da leishmaniose tegumentar americana]». *Revista de Saude Publica* 38, nr. 4 (2004): 511-516.

Arboleda, S.a, D.E.b Gorla, X.b c Porcasi, A.d Saldapa, J.d Calzada, og N.a Jaramillo-O. «Development of a geographical distribution model of *Rhodnius pallescens* Barber, 1932 using environmental data recorded by remote sensing». *Infection, Genetics and Evolution* 9, nr. 4 (2009): 441-448.

Arboleda, S.a, N.a Jaramillo-O., og A.T.b Peterson. «Mapping environmental dimensions of dengue fever transmission risk in the Aburrá Valley, Colombia». *International Journal of Environmental Research and Public Health* 6, nr. 12 (2009): 3040-3055.

Arbour, K.P., og K.A. Martin Ginis. «The relationship between physical activity facility proximity and leisure-time physical activity in persons with spinal cord injury». *Disability and Health Journal* 2, nr. 3 (2009): 128-135.

Arcury, T. A., W. M. Gesler, J. S. Preisser, J. Sherman, J. Spencer, og J. Perin. «The effects of geography and spatial behavior on health care utilization among the residents of a rural region». *Health Services Research* 40, nr. 1 (2005): 135-156.

Arcury, T.A.a, W.M.b Gesler, J.S.c Preisser, J.b Sherman, J.d Spencer, og J.c Perin. «The effects of geography and spatial behavior on health care utilization among the residents of a rural region». *Health Services Research* 40, nr. 1 (2005): 135-155.

Aronson, R.E.a, A.B.b Wallis, P.J.c O'Campo, og P.d Schafer. «Neighborhood mapping and evaluation: A methodology for participatory community health initiatives». *Maternal and Child Health Journal* 11, nr. 4 (2007): 373-383.

Ashmore, M.R.a, K.a Batty, F.b Machin, J.b Gulliver, A.c Grossinho, P.c Elliott, J.d Tate, M.d Bell, E.b Livesley, og D.b Briggs. «Effects of traffic management and transport mode on the exposure of schoolchildren to carbon monoxide». *Environmental Monitoring and Assessment* 65, nr. 1-2 (2000): 49-57.

Assunção, R., M. Costa, A. Tavares, og S. Ferreira. «Fast detection of arbitrarily shaped disease clusters». *Statistics in Medicine* 25, nr. 5 (2006): 723-742.

Astell-Burt, T.a, R.a Flowerdew, P.J.a Boyle, og J.F.b Dillon. «Does geographic access to primary healthcare influence the detection of hepatitis C?» *Social Science and Medicine* 72, nr. 9 (2011): 1472-1481.

Atkinson, P.M.a, og A.J.b Graham. «Issues of Scale and Uncertainty in the Global Remote Sensing of Disease». *Advances in Parasitology* 62 (2006): 79-118.

Ayyalasomayajula, B.a, N.a Wiebe, B.R.b c Hemmelgarn, A.a Bello, B.b c Manns, S.a d Klarenbach, og M.a d Tonelli. «A novel technique to optimize facility locations of new nephrology services for remote areas». *Clinical Journal of the American Society of Nephrology* 6, nr. 9 (2011): 2157-2164.

Babu, A.N.a, og E.b Niehaus. «Multi-disciplinary development of an Early Warning and Automated Response System (EWARS) for epidemic prevention». I *Modelling for Environment's Sake: Proceedings of the 5th Biennial Conference of the International Environmental Modelling and Software Society, iEMSS 2010, 3:2307-2315, 2010.*  
[http://www.scopus.com/inward/record.url?eid=2-s2.0-84858662286&partnerID=40&md5=dc2129092a24a97513dbc8e91c850b02.](http://www.scopus.com/inward/record.url?eid=2-s2.0-84858662286&partnerID=40&md5=dc2129092a24a97513dbc8e91c850b02)

Bailey, P.E.a, E.B.a Keyes, C.a Parker, M.b Abdullah, H.c Kebede, og L.d Freedman. «Using a GIS to model interventions to strengthen the emergency referral system for maternal and newborn health in Ethiopia». *International Journal of Gynecology and Obstetrics* 115, nr. 3 (2011): 300-309.

Bailony, M.R.a, M.K.b Hararah, A.R.c Salhab, I.d Ghannam, Z.d Abdeen, og J.e f Ghannam. «Cancer registration and healthcare access in West Bank, Palestine: A GIS analysis of childhood cancer, 1998-2007». *International Journal of Cancer* 129, nr. 5 (2011): 1180-1189.

Bakker, M.I.a, M.b Hatta, A.b Kwenang, W.R.c Faber, S.M.a van Beers, P.R.a Klatser, og L.a Oskam. «Population survey to determine risk factors for Mycobacterium leprae transmission and infection». *International Journal of Epidemiology* 33, nr. 6 (2004): 1329-1336.

Ballas, D.a, G.b Clarke, D.a Dorling, J.a Rigby, og B.a Wheeler. «Using geographical information systems and spatial microsimulation for the analysis of health inequalities». *Health Informatics Journal* 12, nr. 1 (2006): 65-79.

Banta, J.E.a, S.a Wiafe, S.a Soret, og C.b Holzer. «A spatial needs assessment of indigent acute psychiatric discharges in California». *Journal of Behavioral Health Services and Research* 35, nr. 2 (2008): 179-194.

Barcellos, C., og P.C. Sabroza. «Socio-environmental determinants of the leptospirosis outbreak of 1996 in western Rio de Janeiro: A geographical approach». *International Journal of Environmental Health Research* 10, nr. 4 (2000): 301-313.

Barcellos, C.a, L.M.W.b Acosta, E.b Lisboa, og F.I.a Bastos. «Surveillance of mother-to-child HIV transmission: Socioeconomic and health care coverage indicators [Vigilância da transmissão vertical do HIV: Indicadores

socioeconomicos e de cobertura de atennyo ũ saŕde]». Revista de Saude Publica 43, nr. 6 (2009): 1006-1013.

Barcellos, C.a, L.M.W.b Acosta, E.P.b Lisboa, M.R.V.b Brito, og R.b Flores. «Estimate of HIV prevalence in pregnant women by means of spatial analysis in Southern Brazil». Revista de Saude Publica 40, nr. 5 (2006): 928-930.

Barnett, E., M. L. Casper, J. A. Halverson, G. A. Elmes, V. E. Braham, Z. A. Majeed, A. S. Bloom, og S. Stanley. Men and heart disease: An atlas of racial and ethnic disparities in mortality. CDC, Centers for Disease Control and Prevention, 2001.

<http://ntis.library.gatech.edu/handle/123456789/9053>.

Barrett, F.A. «Finke's 1792 map of human diseases: The first world disease map?» Social Science and Medicine 50, nr. 7-8 (2000): 915-921.

Bassett, E.M.a c, og R.P.b Glandon. «Influencing design, promoting health». Journal of Public Health Management and Practice 14, nr. 3 (2008): 244-254.

Bates, S.J.a, J.b Trostle, W.T.c Cevallos, A.a Hubbard, og J.N.S.d e Eisenberg. «Relating diarrheal disease to social networks and the geographic configuration of communities in rural Ecuador». American Journal of Epidemiology 166, nr. 9 (2007): 1088-1095.

Bath, P., C. Craigs, R. Maheswaran, J. Raymond, og P. Willett. Use of graph theory for data mining in public health. Bd. 6, 2002.

<http://www.scopus.com/inward/record.url?eid=2-s2.0-2942642730&partnerID=40&md5=9d2e800de291118ff43260b8597f5dd0>.

Baum, S.a, E.b Kendall, H.d Muenchberger, O.d Gudes, og T.c Yigitcanlar. «Geographical information systems: An effective planning and decision-making platform for community health coalitions in Australia». Health Information Management Journal 39, nr. 3 (2010): 28-33.

Bavia, M.E.a c, D.D.M.T.a Carneiro, H.b Da Costa Gurgel, C.c Madureira Filho, og M.G.a Rodrigues Barbosa. «Remote Sensing and Geographic Information Systems and risk of American Visceral Leishmaniasis in Bahia, Brazil». Parassitologia 47, nr. 1 (2005): 165-169.

Bavia, M.E.a, J.B.b Malone, L.c Hale, A.d Dantas, L.e Marroni, og R.a Reis. «Use of thermal and vegetation index data from earth observing satellites to evaluate the risk of schistosomiasis in Bahia, Brazil». Acta Tropica 79, nr. 1 (2001): 79-85.

Bazemore, A.a, P.b Diller, og M.c Carrozza. «The impact of a clinic move on vulnerable patients with chronic disease: A geographic information systems (GIS) analysis». Journal of the American Board of Family Medicine 23, nr. 1 (2010): 128-130.

Beale, L.a, J.J.a b Abellan, S.c Hodgson, og L.a Jarup. «Methodologic issues and approaches to spatial epidemiology». Environmental Health Perspectives 116, nr. 8 (2008): 1105-1110.

Beck, L.R., B.M. Lobitz, og B.L. Wood. «Remote sensing and human health: New sensors and new opportunities». Emerging Infectious Diseases 6, nr. 3 (2000): 217-227.

Bell, N., og N. Schuurman. «Gis and injury prevention and control: History, challenges, and opportunities». International Journal of Environmental Research and Public Health 7, nr. 3 (2010): 1002-1017.

Berger, M., og R. Suchet. «Accessibility and health care patterns of haemophiliac patients: Analysis based on the case of Brittany [Accessibilitŕ et parcours de soins des hŕmophiles: Analyses ũ partir du cas de la Bretagne]». Cahiers de Geographie du Quebec 55, nr. 156 (2011): 511-527.

Bergquist, N.R. «Vector-borne parasitic diseases: New trends in data collection and risk assessment». Acta Tropica 79, nr. 1 (2001): 13-20.

Bergquist, R.a, og M.b c Tanner. «Controlling Schistosomiasis in Southeast Asia. A Tale of Two Countries». Advances in Parasitology 72, nr. C (2010): 109-144.

Berke, E.M.a h, T.D.b Koepsell, A.V.c Moudon, R.E.d e Hoskins, og E.B.f g Larson. «Association of the built environment with physical activity and obesity in older persons». American Journal of Public Health 97, nr. 3 (2007): 486-492.

Berrang-Ford, L.a, O.b Berke, S.c Sweeney, og L.d Abdelrahman. «Sleeping sickness in Southeastern Uganda: A spatio-temporal analysis of disease

risk, 1970-2003». *Vector-Borne and Zoonotic Diseases* 10, nr. 10 (2010): 977-988.

Bersamin, M., M. Todd, og L. Remer. «Does Distance Matter? Access to Family Planning Clinics and Adolescent Sexual Behaviors». *Maternal and child health journal* 15, nr. 5 (2011): 652-659.

Beyer, K. M. M., S. Comstock, og R. Seagren. «Disease Maps as Context for Community Mapping: A Methodological Approach for Linking Confidential Health Information with Local Geographical Knowledge for Community Health Research». *Journal of community health* 35, nr. 6 (2010): 635-644.

Beyer, K.M.M.c, S.a Comstock, og R.b Seagren. «Disease maps as context for community mapping: A methodological approach for linking confidential health information with local geographical knowledge for community health research». *Journal of Community Health* 35, nr. 6 (2010): 635-644.

Bhunia, G.S., V. Kumar, A.J. Kumar, P. Das, og S. Kesari. «The use of remote sensing in the identification of the eco-environmental factors associated with the risk of human visceral leishmaniasis (kala-azar) on the Gangetic plain, in north-eastern India». *Annals of Tropical Medicine and Parasitology* 104, nr. 1 (2010): 35-53.

Bhunia, G.S.a, S.a Kesari, A.b Jeyaram, V.a Kumar, og P.a Das. «Influence of topography on the endemicity of Kala-azar: A study based on remote sensing and geographical information system». *Geospatial Health* 4, nr. 2 (2010): 155-165.

Biggeri, A., D. Catelan, og E. Dreassi. «The epidemic of lung cancer in Tuscany (Italy): A joint analysis of male and female mortality by birth cohort». *Spatial and Spatio-temporal Epidemiology* 1, nr. 1 (2009): 31-40.

Bjørk, J., J. Ardø, E. Stroh, H. Løvkvist, P. O. Østergren, og M. Albin. «Road traffic noise in southern Sweden and its relation to annoyance, disturbance of daily activities and health». *Scandinavian journal of work, environment & health* (2006): 392-401.

Blatt, A. J. «Maps, geography libraries, and health outcomes: Gazing into the future of medical geography». *Journal of Map And Geography Libraries* 7, nr. 1 (2011): 2-12.

Bodin, T., M. Albin, J. Ardo, E. Stroh, P. O. Ostergren, og J. Bjork. «Road traffic noise and hypertension: results from a cross-sectional public health survey in southern Sweden». *Environ Health* 8, nr. 1 (2009): 38-47.

Boers, N.M., D. Chodos, J. Huang, P. Gburzy?ski, I. Nikolaidis, og E. Stroulia. «The Smart Condo: Visualizing independent living environments in a virtual world». I 2009 3rd International Conference on Pervasive Computing Technologies for Healthcare - Pervasive Health 2009, PCTHealth 2009, 2009. <http://www.scopus.com/inward/record.url?eid=2-s2.0-70350784178&partnerID=40&md5=ab64771e1ff0c0fa10e2e8914f015839>.

Boldo, E.a b, C.a b Linares, J.c Lumbreras, R.c Borge, A.c Narros, J.a b Garcva-Perez, P.a b Fern?ndez-Navarro, et al. «Health impact assessment of a reduction in ambient PM 2.5 levels in Spain». *Environment International* 37, nr. 2 (2011): 342-348.

Bonet, M., J. M. Spiegel, A. M. Ibarra, G. Kouri, A. Pintre, og A. Yassi. «An integrated ecosystem approach for sustainable prevention and control of dengue in Central Havana». *International journal of occupational and environmental health* 13, nr. 2 (2007): 188-194.

Bonet, M.a g, J.M.b c Spiegel, A.M.a Ibarra, G.e Kouri, A.f Pintre Lic, og A.b d Yassi. «An integrated ecosystem approach for sustainable prevention and control of dengue in Central Havana». *International Journal of Occupational and Environmental Health* 13, nr. 2 (2007): 188-194.

Bonfim, C.a b, A.c Alves, T.R.d Costa, F.e Alencar, D.f g Pedroza, J.L.h Portugal, og Z.b i Medeiros. «Spatial analysis and privation index to identify urban areas with a high risk of lymphatic filariasis». *Tropical Medicine and International Health* 16, nr. 6 (2011): 748-755.

Bonner, M.R.a, D.b Han, J.a Nie, P.b Rogerson, J.E.a Vena, og J.L.a Freudenheim. «Positional accuracy of geocoded addresses in epidemiologic research». *Epidemiology* 14, nr. 4 (2003): 408-412.

Boone-Heinonen, J.a, B.M.a Popkin, Y.b Song, og P.a Gordon-Larsen. «What neighborhood area captures built environment features related to adolescent physical activity?» *Health and Place* 16, nr. 6 (2010): 1280-1286.

Borrell, L.N.a, M.E.b Northridge, D.B.c Miller, C.A.b Golembeski, S.E.d e Spielman, E.D.f Sclar, og I.B.g Lamster. «Oral health and health care for older adults: A spatial approach for addressing disparities and planning services». *Special Care in Dentistry* 26, nr. 6 (2006): 252-256.

Bouden, M.a b, B.a b Moulin, og P.b c d Gosselin. «The geosimulation of West Nile virus propagation: A multi-agent and climate sensitive tool for risk management in public health». *International Journal of Health Geographics* 7 (2008). <http://www.scopus.com/inward/record.url?eid=2-s2.0-48749132010&partnerID=40&md5=0565d583b94519cbec8fff80dd5f1fea>.

Boulos, D.N.K.a, R.R.b Ghali, E.M.c Ibrahim, M.N.K.d Boulos, og P.d Abdelmalik. «An eight-year snapshot of geospatial cancer research (2002-2009): Clinico-epidemiological and methodological findings and trends». *Medical Oncology* 28, nr. 4 (2011): 1145-1162.

Boulos, M. N. K., A. Anastasiou, E. Bekiaris, og M. Panou. «Geo-enabled technologies for independent living: examples from four European projects». *Technology and Disability* 23, nr. 1 (2011): 7-17.

Boulos, M.N.K.a, A.b Anastasiou, E.c Bekiaris, og M.c Panou. «Geo-enabled technologies for independent living: Examples from four European projects». *Technology and Disability* 23, nr. 1 (2011): 7-17.

Boulos, M.N.K.a, S.b Wheeler, C.c Tavares, og R.a Jones. «How smartphones are changing the face of mobile and participatory healthcare: An overview, with example from eCAALYX». *BioMedical Engineering Online* 10 (2011). <http://www.scopus.com/inward/record.url?eid=2-s2.0-79954954909&partnerID=40&md5=bd67700bea322371369c6e1c89b79c91>.

Boxall, J. «From snow to GIS librarians: The case for health GIS and informatics within the library». *Journal of Map and Geography Libraries* 7, nr. 1 (2011): 114-118.

Brabyn, L., og P. Beere. «Population access to hospital emergency departments and the impacts of health reform in New Zealand». *Health Informatics Journal* 12, nr. 3 (2006): 227-237.

Brabyn, L., og P. Gower. «Comparing three GIS techniques for modelling geographical access to general practitioners». *Cartographica* 39, nr. 2 (2004): 41-50.

Brabyn, L.a, og R.b Barnett. «Population need and geographical access to general practitioners in rural New Zealand». *New Zealand Medical Journal* 117, nr. 1199 (2004). <http://www.scopus.com/inward/record.url?eid=2-s2.0-6944242695&partnerID=40&md5=76e891fe5b1b509506659985725ed4f6>.

Brauner-Otto, S.R.a, W.G.b Axinn, og D.J.b Ghimire. «The spread of health services and fertility transition». *Demography* 44, nr. 4 (2007): 747-770.

Brezmes, T., J. L. Gorricho, og J. Cotrina. «Activity recognition from accelerometer data on a mobile phone». *Distributed Computing, Artificial Intelligence, Bioinformatics, Soft Computing, and Ambient Assisted Living* (2009): 796-799.

Brianti, E.a, M.b Drigo, V.B.a Zirilli, D.c Forino, G.d Poglayen, og S.a Giannetto. «Proposal of Health Information System (HIS) as tool for the epidemiological surveillance of leishmaniasis in urban areas». *Parassitologia* 48, nr. 1-2 (2006): 111-113.

Brink, M. «Parameters of well-being and subjective health and their relationship with residential traffic noise exposure—A representative evaluation in Switzerland». *Environment international* 37, nr. 4 (2011): 723-733.

Brooker, S. «Schistosomes, snails and satellites». *Acta Tropica* 82, nr. 2 (2002): 207-214.

Brooker, S.a b, M.c Beasley, M.d Ndinaromtan, E.M.d Madjiouroum, M.e Baboguel, E.f Djenguinabe, S.I.g Hay, og D.A.P.h Bundy. «Use of remote sensing and a geographical information system in a national helminth control programme in Chad». *Bulletin of the World Health Organization* 80, nr. 10 (2002): 783-789.

Brooker, S.a b, P.J.c d Hotez, og D.A.P.e Bundy. «The global atlas of helminth infection: Mapping the way forward in neglected tropical disease control». *PLoS Neglected Tropical Diseases* 4, nr. 7 (2010). <http://www.scopus.com/inward/record.url?eid=2-s2.0-77957921383&partnerID=40&md5=177545067b734524621ca398882d925c>.

Brooker, S.a b, N.B.c Kabatereine, J.O.d Gyapong, J.R.e Stothard, og J.f Utzinger. «Rapid mapping of schistosomiasis and other neglected tropical diseases in the context of integrated control programmes in Africa». *Parasitology* 136, nr. 13 (2009): 1707-1718.

Brooker, S.a, A.C.A.a b Clements, og D.A.P.c Bundy. «Global Epidemiology, Ecology and Control of Soil-Transmitted Helminth Infections». *Advances in Parasitology* 62 (2006): 221-261.

Brooker, S.a g, P.b Singhasivanon, J.b c Waikagul, S.f Supavej, S.c Kojima, T.d Takeuchi, T.V.e Luong, og S.f Looareesuwan. «Mapping soil-transmitted helminths in Southeast Asia and implications for parasite control». *Southeast Asian Journal of Tropical Medicine and Public Health* 34, nr. 1 (2003): 24-36.

Brownstein, J.S., T.C. Green, T.A. Cassidy, og S.F. Butler. «Geographic information systems and pharmacoepidemiology: Using spatial cluster detection to monitor local patterns of prescription opioid abuse». *Pharmacoepidemiology and Drug Safety* 19, nr. 6 (2010): 627-637.

Brownstein, J.S., T.R. Holford, og D. Fish. «A climate-based model predicts the spatial distribution of the Lyme disease vector *Ixodes scapularis* in the United States». *Environmental Health Perspectives* 111, nr. 9 (2003): 1152-1157.

Brownstein, J.S.a b d, D.K.c Skelly, T.R.a Holford, og D.a Fish. «Forest fragmentation predicts local scale heterogeneity of Lyme disease risk». *Oecologia* 146, nr. 3 (2005): 469-475.

Bruel, J.a, S.b Gravely-Witte, N.c Suskin, D.E.d e Stewart, A.b Macpherson, og S.L.b d e Grace. «Drive time to cardiac rehabilitation: At what point does it affect utilization?» *International Journal of Health Geographics* 9 (2010). <http://www.scopus.com/inward/record.url?eid=2-s2.0-77952995743&partnerID=40&md5=cf77195642dfc736e07f494fb75f353>.

Bruneau, J.a b, M.a c Daniel, Y.c d Kestens, G.a Zang, og M.c Gindreux. «Associations between HIV-related injection behaviour and distance to and patterns of utilisation of syringe-supply programmes». *Journal of Epidemiology and Community Health* 62, nr. 9 (2008): 804-810.

Buckley, J.W.a, E.R.a Bates, og B.K.a b Nallamothe. «Primary percutaneous coronary intervention expansion to hospitals without on-site cardiac surgery in Michigan: A geographic information systems analysis». *American Heart Journal* 155, nr. 4 (2008): 668-672.

Bunnell, J.E.a g, C.A.a b Tatu, R.N.c Bushon, D.M.c Stoeckel, A.M.G.c Brady, M.a Beck, H.E.a Lerch, et al. «Possible linkages between lignite aquifers, pathogenic microbes, and renal pelvic cancer in northwestern Louisiana, USA». *Environmental Geochemistry and Health* 28, nr. 6 (2006): 577-587.

Burch, J. B., M. Clark, M. G. Yost, C. T. E. Fitzpatrick, A. M. Bachand, J. Ramaprasad, og J. S. Reif. «Radio frequency nonionizing radiation in a community exposed to radio and television broadcasting». *Environmental health perspectives* 114, nr. 2 (2006): 248.

Burra, T., M. Jerrett, R.T. Burnett, og M. Anderson. «Conceptual and practical issues in the detection of local disease clusters: A study of mortality in Hamilton, Ontario». *Canadian Geographer* 46, nr. 2 (2002): 160-171.

Butler, D.C.a b, S.c Petterson, A.c Bazemore, og K.A.a Douglas. «Use of measures of socioeconomic deprivation in planning primary health care workforce and defining health care need in Australia». *Australian Journal of Rural Health* 18, nr. 5 (2010): 199-204.

Börnighausen, T.a b, F.b Tanser, T.c Hallett, og M.-L.b c Newell. «Short communication: Prioritizing communities for HIV prevention in sub-saharan Africa». *AIDS Research and Human Retroviruses* 26, nr. 4 (2010): 401-405.

Cadmus, S.I., A.A. Akingbogun, og H.K. Adesokan. «Using geographical information system to model the spread of tuberculosis in the University of Ibadan, Nigeria.» *African journal of medicine and medical sciences* 39 Suppl (2010): 193-199.

Caley, L.M.a b. «Using geographic information systems to design population-based interventions». *Public Health Nursing* 21, nr. 6 (2004): 547-554.

Campo, E., og E. Grangereau. «Wireless fall sensor with GPS location for monitoring the elderly». I Proceedings of the 30th Annual International Conference of the IEEE Engineering in Medicine and Biology Society, EMBS'08 - «Personalized Healthcare through Technology», 498-501, 2008. <http://www.scopus.com/inward/record.url?eid=2-s2.0-61849130513&partnerID=40&md5=e088d310577a69e0c7edd1f922c0d171>.

Carr, B.G.a b, og D.K.c Addyson. «Geographic information systems and emergency care planning». *Academic Emergency Medicine* 17, nr. 12 (2010): 1274-1278.

Casas, I.a, E.b Delmelle, og A.c Varela. «A space-time approach to diffusion of health service provision information». *International Regional Science Review* 33, nr. 2 (2010): 134-156.

Case, A.P.a f, M.A.a Canfield, A.b Barnett, P.b Raimondo, M.c Drummond-Borg, J.d Livingston, og J.e Kowalik. «Proximity of pediatric genetic services to children with birth defects in Texas». *Birth Defects Research Part A - Clinical and Molecular Teratology* 82, nr. 11 (2008): 795-798.

Cattand, P.a b c d, J.a b c Jannin, og P.a b c Lucas. «Sleeping sickness surveillance: An essential step towards elimination». *Tropical Medicine and International Health* 6, nr. 5 (2001): 348-361.

Ceccato, P., M.A. Bell, M.B. Blumenthal, S.J. Connor, T. Dinku, E.K. Grover-Kopec, C.F. Ropelewski, og M.C. Thomson. «Use of remote sensing for monitoring climate variability for integrated early warning systems: Applications for human diseases and desert locust management». I *International Geoscience and Remote Sensing Symposium (IGARSS)*, 270-274, 2006. <http://www.scopus.com/inward/record.url?eid=2-s2.0-34948862755&partnerID=40&md5=ffbd230d434598971c106b97420cb6a6>.

Ceccato, P.a c, S.J.a Connor, I.b Jeanne, og M.C.a Thomson. «Application of Geographical Information Systems and Remote Sensing technologies for assessing and monitoring malaria risk». *Parassitologia* 47, nr. 1 (2005): 81-96.

Cecchi, G.a, M.a Paone, J.R.b Franco, E.M.c FØvre, A.d Diarra, J.A.e Ruiz, R.C.a Mattioli, og P.P.b Simarro. «Towards the Atlas of human African trypanosomiasis». *International Journal of Health Geographics* 8, nr. 1 (2009). <http://www.scopus.com/inward/record.url?eid=2-s2.0-63649100286&partnerID=40&md5=a0e9afa034ac21bbfb103351660924c8>.

Cerin, E.a, E.b Leslie, L.d.c Toit, N.c Owen, og L.D.d Frank. «Destinations that matter: Associations with walking for transport». *Health and Place* 13, nr. 3 (2007): 713-724.

Cervigni, F., Y. Suzuki, T. Ishii, og A. Hata. «Spatial accessibility to pediatric services». *Journal of Community Health* 33, nr. 6 (2008): 444-448.

Chai, L.a, Z.a Wang, Y.a Wang, Z.a Yang, H.a Wang, og X.b Wu. «Ingestion risks of metals in groundwater based on TIN model and dose-response assessment - A case study in the Xiangjiang watershed, central-south China». *Science of the Total Environment* 408, nr. 16 (2010): 3118-3124.

Chang, Y.-C.a, T.-H.b Wen, og M.-S.a Lai. «Using geographic information systems (GIS) to identify the association between geographic accessibility and hospital-seeking behavior by hepatocellular carcinoma patients in Taiwan». *Taiwan Journal of Public Health* 28, nr. 6 (2009): 517-529.

Chansang, C.a, og P.a b Kittayapong. «Application of mosquito sampling count and geospatial methods to improve dengue vector surveillance». *American Journal of Tropical Medicine and Hygiene* 77, nr. 5 (2007): 897-902.

Chellini, E., M. Cherubini, L. Chetoni, A. S. Costantini, A. Biggeri, og G. Vannucchi. «Risk of respiratory cancer around a sewage plant in Prato, Italy». *Archives of Environmental Health: An International Journal* 57, nr. 6 (2002): 548-553.

Chen, S.C.-C., J.-D. Wang, J.K.-L. Yu, T.-Y.C. Rn, C.-C. Chan, H.-H.W. Rn, Y.M.Z. Nyasulu, og R. Kolola-Dzimadzi. «Applying the Global Positioning System and Google Earth to Evaluate the Accessibility of Birth Services for Pregnant Women in Northern Malawi». *Journal of Midwifery and Women's Health* 56, nr. 1 (2011): 68-74.



Chen, Y.a, E.b Waters, og J.b Green. «Geospatial analysis of childhood pertussis in Victoria, 1993-97». Australian and New Zealand Journal of Public Health 26, nr. 5 (2002): 456-461.

Chen, Y.-W.a, G.-J.a Wang, T.-H.a Li, T.-M.a Yang, T.-W.a Shiu, M.-S.a Tasi, Y.-W.a Jeng, og C.-W.b Chen. «A RFID model of transferring and tracking trauma patients after a large disaster». I 2009 IEEE/INFORMS International Conference on Service Operations, Logistics and Informatics, SOLI 2009, 98-101, 2009. <http://www.scopus.com/inward/record.url?eid=2-s2.0-70449492028&partnerID=40&md5=a35efc753bb15bdf883d56eb218f73cc>.

Cheng, A. C., S. P. Jacups, D. Gal, M. Mayo, og B. J. Currie. «Extreme weather events and environmental contamination are associated with case-clusters of melioidosis in the Northern Territory of Australia». International journal of epidemiology 35, nr. 2 (2006): 323-329.

Chiang, P.-H.a b, T.-C.a Chan, og D.P.H.b Hsieh. «A GIS-aided assessment of the health hazards of cadmium in farm soils in central Taiwan». International Journal of Environmental Research and Public Health 8, nr. 9 (2011): 3759-3763.

Choi, M.a, B.b c Afzal, og B.b Sattler. «Geographic information systems: A new tool for environmental health assessments». Public Health Nursing 23, nr. 5 (2006): 381-391.

Choi, M.-H.a, K.-S.a Cheong, B.-M.a Cho, I.-K.a Hwang, C.-H.b Kim, M.-H.c Kim, S.-S.d Hwang, J.-H.e Lim, og T.-H.a Yoon. «Deprivation and mortality at the town level in Busan, Korea: An ecological study». Journal of Preventive Medicine and Public Health 44, nr. 6 (2011): 242-248.

Christie, S., G. Morgan, M. Heaven, Q. Sandifer, og H. van Woerden. «Analysis of renal service provision in south and mid Wales». Public Health 119, nr. 8 (2005): 738-742.

Chunxiang, C.a, C.a b Chang, M.a b Xu, J.a b Zhao, M.a b Gao, H.a Zhang, J.c Guo, et al. «Epidemic risk analysis after the Wenchuan Earthquake using remote sensing». International Journal of Remote Sensing 31, nr. 13 (2010): 3631-3642.

Cinnamon, J., N. Schuurman, og V.A. Crooks. «A method to determine spatial access to specialized palliative care services using GIS». BMC Health Services Research 8 (2008). <http://www.scopus.com/inward/record.url?eid=2-s2.0-47249144313&partnerID=40&md5=881aa2564cc2408381ea116815d138f5>.

Cinnamon, J., N. Schuurman, og V.A. Crooks. «Assessing the suitability of host communities for secondary palliative care hubs: A location analysis model». Health and Place 15, nr. 3 (2009): 792-800.

Clark, R. A., A. Driscoll, J. Nottage, S. McLennan, D. M. Coombe, E. J. Bamford, D. Wilkinson, og S. Stewart. «Inequitable provision of optimal services for patients with chronic heart failure: a national geo-mapping study». Medical journal of Australia 186, nr. 4 (2007): 169.

Clark, R.A.a, A.b Driscoll, J.c Nottage, S.d McLennan, D.M.c Coombe, E.J.c Bamford, D.e Wilkinson, og S.f Stewart. «Inequitable provision of optimal services for patients with chronic heart failure: A national geo-mapping study». Medical Journal of Australia 186, nr. 4 (2007): 169-173.

Cleckner, H.L.a, T.R.a Allen, og A.b Scott Bellows. «Remote sensing and modeling of mosquito abundance and habitats in Coastal Virginia, USA». Remote Sensing 3, nr. 12 (2011): 2663-2681.

Clements, A.C.A.a b, M.-A.c Deville, O.d Ndayishimiye, S.e f Brooker, og A.c Fenwick. «Spatial co-distribution of neglected tropical diseases in the East African Great Lakes region: Revisiting the justification for integrated control». Tropical Medicine and International Health 15, nr. 2 (2010): 198-207.

Clements, A.C.A.a, og D.U.b Pfeiffer. «Emerging viral zoonoses: Frameworks for spatial and spatiotemporal risk assessment and resource planning». Veterinary Journal 182, nr. 1 (2009): 21-30.

Cole, S.L., J. Siddiqui, D.J. Harry, og C.E. Sandrock. «WiFi RFID demonstration for resource tracking in a statewide disaster drill.» American journal of disaster medicine 6, nr. 3 (2011): 155-162.

Comba, P.a, V.b Ascoli, S.a Belli, M.a Benedetti, L.c Gatti, P.c Ricci, og A.d Tieghi. «Risk of soft tissue sarcomas and residence in the

neighbourhood of an incinerator of industrial wastes». *Occupational and Environmental Medicine* 60, nr. 9 (2003): 680-683.

Condino, M.L.F.a d, E.A.B.b Galati, M.M.a Holcman, M.R.B.c Salum, D.C.c Da Silva, og R.A.c Novaes Jr. «American cutaneous leishmaniasis on the northern coastline of the State of São Paulo, 1993 to 2005 [Leishmaniose tegumentar americana no Litoral Norte Paulista, período 1993 a 2005]». *Revista da Sociedade Brasileira de Medicina Tropical* 41, nr. 6 (2008): 635-641.

Cook, A.G.a b, A.J.B.M.b c Devos, G.a b Pereira, A.b d Jardine, og P.b e Weinstein. «Use of a total traffic count metric to investigate the impact of roadways on asthma severity: A case-control study». *Environmental Health: A Global Access Science Source* 10, nr. 1 (2011).  
<http://www.scopus.com/inward/record.url?eid=2-s2.0-79957662608&partnerID=40&md5=97f1113dfb30287f5571eeea7820dle8>.

Coombes, E.a, A.P.a Jones, og M.b Hillsdon. «The relationship of physical activity and overweight to objectively measured green space accessibility and use». *Social Science and Medicine* 70, nr. 6 (2010): 816-822.

Cordivano, S. «Maternity ward closures in Philadelphia: Using GIS to measure disruptions in essential health services». *Journal of Map and Geography Libraries* 7, nr. 3 (2011): 282-303.

Cornelis, C.a, G.a Schoeters, E.b Kellen, F.b Buntinx, og M.c Zeegers. «Development of a GIS-based indicator for environmental pesticide exposure and its application to a Belgian case-control study on bladder cancer». *International Journal of Hygiene and Environmental Health* 212, nr. 2 (2009): 172-185.

Correa Antonialli, S.A., T.G. Torres, A.C. Paranhos Filho, og J.E. Tolezano. «Spatial analysis of American Visceral Leishmaniasis in Mato Grosso do Sul State, Central Brazil». *Journal of Infection* 54, nr. 5 (2007): 509-514.

Correia, V.R.D.M.a b e, A.M.V.a Monteiro, M.S.b Carvalho, og G.L.c d Werneck. «A remote sensing application to investigate urban endemics [Uma aplicação do sensoriamento remoto para a investigação de endemias urbanas]». *Cadernos de Saude Publica* 23, nr. 5 (2007): 1015-1028.

Cortis, A., I. Aspuru, og N. Tellado. «Environmental Noise Management Systems in Large Towns Integrating GIS Technologies and Interim Calculation Methods». I Proceedings 18th International Congress on Acoustic. Kyoto, 4-9, 2004. <http://lib.ioa.ac.cn/ScienceDB/18TH-ICA/pdf/We2.X1.5.pdf>.

Costa, L.S.a, C.D.b Nassi, R.S.c Pinheiro, og R.M.V.R.a Almeida. «Accessibility of selected hospitals and medical procedures by means of aerial and transit network-based measures». *Health Services Management Research* 16, nr. 2 (2003): 136-140.

Courtin, F.a, V.a Jamonneau, M.b Camara, O.b Camara, B.c Coulibaly, A.d Diarra, P.a Solano, og B.a Bucheton. «A geographical approach to identify sleeping sickness risk factors in a mangrove ecosystem». *Tropical Medicine and International Health* 15, nr. 8 (2010): 881-889.

Courtney, K.L. «Visualizing nursing workforce distribution: Policy evaluation using geographic information systems». *International Journal of Medical Informatics* 74, nr. 11-12 (2005): 980-988.

Coutts, C.a, M.b Horner, og T.a Chapin. «Using geographical information system to model the effects of green space accessibility on mortality in Florida». *Geocarto International* 25, nr. 6 (2010): 471-484.

Cradock, A.L.a, S.J.b Melly, J.G.c Allen, J.S.d Morris, og S.L.a Gortmaker. «Youth Destinations Associated with Objective Measures of Physical Activity in Adolescents». *Journal of Adolescent Health* 45, nr. 3 SUPPL. (2009): S91-S98.

Cringoli, G.a c, A.b Ippolito, og R.b Taddei. «Advances in satellite Remote Sensing of pheno-climatic features for epidemiological applications». *Parassitologia* 47, nr. 1 (2005): 51-62.

Cromley, E., L.C. Kleinman, M.A. Ramos, G. Arniella, N. Viswanathan, M. Garel, og C.R. Horowitz. «A community-engaged approach to select geographic areas for interventions to reduce health disparities.» *Progress in community health partnerships?: research, education, and action* 5, nr. 3 (2011): 299-305.

Cromley, E.K. «GIS and disease». *Annual Review of Public Health* 24 (2003): 7-24.

Croner, C.M. «Public health, GIS, and the internet». *Annual Review of Public Health* 24 (2003): 57-82.

Crouse, D.L., N.A. Ross, og M.S. Goldberg. «Double burden of deprivation and high concentrations of ambient air pollution at the neighbourhood scale in Montreal, Canada». *Social Science and Medicine* 69, nr. 6 (2009): 971-981.

Cuadros, D.F.a, A.J.b Branscum, og P.H.a Crowley. «HIV-malaria co-infection: Effects of malaria on the prevalence of HIV in East sub-Saharan Africa». *International Journal of Epidemiology* 40, nr. 4 (2011): 931-939.

Cudnik, M. T., R. H. Schmicker, C. Vaillancourt, C. D. Newgard, J. M. Christenson, D. P. Davis, og R. A. Lowe. «A geospatial assessment of transport distance and survival to discharge in out of hospital cardiac arrest patients: Implications for resuscitation centers». *Resuscitation* 81, nr. 5 (2010): 518-523.

Cudnik, M.T.a, R.H.b Schmicker, C.c Vaillancourt, C.D.d Newgard, J.M.e Christenson, D.P.f Davis, og R.A.d Lowe. «A geospatial assessment of transport distance and survival to discharge in out of hospital cardiac arrest patients: Implications for resuscitation centers». *Resuscitation* 81, nr. 5 (2010): 518-523.

Cuevas, L.E.a, I.b Jeanne, A.c Molesworth, M.d Bell, E.C.a Savory, S.J.d Connor, og M.C.d Thomson. «Risk mapping and early warning systems for the control of meningitis in Africa». *Vaccine* 25, nr. SUPPL. 1 (2007): A12-A17.

Culham, L.E.a b, B.c Ryan, A.J.d Jackson, A.R.e Hill, B.f Jones, C.a Miles, J.A.g Young, C.b Bunce, og A.C.a b Bird. «Low vision services for vision rehabilitation in the United Kingdom». *British Journal of Ophthalmology* 86, nr. 7 (2002): 743-747.

Culpepper II, W.J.a b, D.c d Cowper-Ripley, E.R.c Litt, T.-Y.a b McDowell, og P.M.c d Hoffman. «Using geographic information system tools to improve access to MS specialty care in veterans health administration». *Journal of Rehabilitation Research and Development* 47, nr. 6 (2010): 583-592.

Cusimano, M.D.a b c g, M.c Chipman, R.H.b c d f Glazier, C.e Rinner, og S.P.g Marshall. «Geomatics in injury prevention: The science, the potential and the limitations». *Injury Prevention* 13, nr. 1 (2007): 51-56.

Cutchin, M.P. «The need for the 'new health geography' in epidemiologic studies of environment and health». *Health and Place* 13, nr. 3 (2007): 725-742.

Czarnecki, K.D.a, C.b Goranson, J.A.a Ellis, L.E.a Vichinsky, M.H.a Coady, og S.B.a Perl. «Using geographic information system analyses to monitor large-scale distribution of nicotine replacement therapy in New York City». *Preventive Medicine* 50, nr. 5-6 (2010): 288-296.

Dadzie, Y.a, M.b Neira, og D.a Hopkins. «Final report of the Conference on the eradicability of Onchocerciasis». *Filaria Journal* 2 (2003).  
<http://www.scopus.com/inward/record.url?eid=2-s2.0-0038101035&partnerID=40&md5=ca93303176ba4a6b3e2d39a8f425eaa5>.

da Silva, A.V.M.a, M.A.F.b Mafra Magalhães, R.P.c Brazil, og J.C.A.d Carreira. «Ecological study and risk mapping of leishmaniasis in an endemic area of Brazil based on a geographical information systems approach». *Geospatial Health* 6, nr. 1 (2011): 33-40.

Dai, D. «Black residential segregation, disparities in spatial access to health care facilities, and late-stage breast cancer diagnosis in metropolitan Detroit». *Health and Place* 16, nr. 5 (2010): 1038-1052.

Daniel, M.a b e, J.c Kolα?, og P.d Zeman. «GIS tools for tick and tick-borne disease occurrence». *Parasitology* 129, nr. SUPPL. (2004): S329-S352.

Danson, F.M., R.P. Armitage, og C.G. Marston. «Spatial and temporal modelling for parasite transmission studies and risk assessment». *Parasite* 15, nr. 3 (2008): 463-468.

Danson, F.M.a, P.b Giraudoux, og P.S.a Craig. «Spatial modelling and ecology of *Echinococcus multilocularis* transmission in China». *Parasitology International* 55, nr. SUPPL. (2006): S227-S231.

Dassau, E., L. Jovanovic, F.J. Doyle 3rd., og H.C. Zisser. «Enhanced 911/global position system wizard: a telemedicine application for the

prevention of severe hypoglycemia-monitor, alert, and locate.» *Journal of diabetes science and technology* 3, nr. 6 (2009): 1501-1506.

Davey, R. C., T. Cochrane, C. Gidlow, J. FAIRBUM, og G. Smith. «Design of a pragmatic cluster randomised controlled trial: Ecological approach to increasing physical activity in an urban community». *Contemporary clinical trials* 29, nr. 5 (2008): 774-782.

Davey, R.C.a c, T.a c Cochrane, C.a c Gidlow, J.b c c Fairburn, og G.b c c Smith. «Design of a pragmatic cluster randomised controlled trial: Ecological approach to increasing physical activity in an urban community». *Contemporary Clinical Trials* 29, nr. 5 (2008): 774-782.

DE, M., S. DIAS, og L. NOBRE. «The use of Geographical Information System (GIS) to improve active leprosy case finding campaigns in the Municipality of Mossoro, Rio Grande do Norte State, Brazil». *Lepr Rev* 78 (2007): 261-269.

DeFraités, R.F., og W.C. Chambers. «Gaining experience with military medical situational awareness and geographic information systems in a simulated influenza epidemic». *Military Medicine* 172, nr. 10 (2007): 1071-1076.

Delemos, J.L.a, D.b Brugge, M.c Cajero, M.c Downs, J.L.a Durant, C.M.d George, S.e Henio-Adeky, et al. «Development of risk maps to minimize uranium exposures in the Navajo Churchrock mining district». *Environmental Health: A Global Access Science Source* 8, nr. 1 (2009).  
<http://www.scopus.com/inward/record.url?eid=2-s2.0-68349141104&partnerID=40&md5=239468d3ea5ede5c0546a11de7c7488c>.

Delgado, L.a, S.a Ramos, E.a Gordon, N.b Martvnez, E.a Montiel, E.d Zoppi, og J.c Berti. «New perspectives in public health management: The particular case of malaria [Nuevas perspectivas para el manejo de salud pùblica: Caso particular de malaria]». *Revista de la Facultad de Ingenieria* 19, nr. 3 (2004): 51-61.

Delgado-Petrocelli, L.a, A.b Camardiel, V.H.c Aguilar, N.d Martinez, K.c Cordova, og S.a Ramos. «Geospatial tools for the identification of a malaria corridor in Estado Sucre, a Venezuelan north-eastern state». *Geospatial Health* 5, nr. 2 (2011): 169-176.

Delva, N.J.a, P.b Graf, S.c Patry, C.d Gosselin, R.e Milev, I.f Gilron, B.g Martin, et al. «Access to electroconvulsive therapy services in canada». *Journal of ECT* 27, nr. 4 (2011): 300-309.

Deshpande, K.a, Ravishankara, V.a Diwan, K.b Lønnoth, V.K.a Mahadik, og R.K.a Chandorkar. «Spatial pattern of private health care provision in Ujjain, India: A provider survey processed and analysed with a Geographical Information System». *Health Policy* 68, nr. 2 (2004): 211-222.

Dill, J. «Bicycling for transportation and health: The role of infrastructure». *Journal of Public Health Policy* 30, nr. SUPPL. 1 (2009): S95-S110.

Diuk-Wasser, M.A.a, G.b Dolo, M.c Bagayoko, N.d Sogoba, M.B.e Toure, M.e Moghaddam, N.e Manoukis, S.e Rian, S.F.e Traore, og C.E.e Taylor. «Patterns of irrigated rice growth and malaria vector breeding in Mali using multi-temporal ERS-2 synthetic aperture radar». *International Journal of Remote Sensing* 27, nr. 3 (2006): 535-548.

Diuk-Wasser, M.A.a, M.B.b Tourt, G.b Dolo, M.c Bagayoko, N.b Sogoba, I.b Sissoko, S.F.b Traort, og C.E.d Taylor. «Effect of rice cultivation patterns on malaria vector abundance in rice-growing villages in Mali». *American Journal of Tropical Medicine and Hygiene* 76, nr. 5 (2007): 869-874.

Dixon-Gough, R., G. Letlole, A. Maluba, og S. Phoza. «The status and role of modern mapping technology in Botswana». *International Journal of Technology, Policy and Management* 4, nr. 1 (2004): 63-80.

Doherty, S.T.a, D.b Doran, og R.A.c Goubran. «An automated multi-sensor monitoring system of elderly homecare client's activity patterns». I *Proceedings of the IADIS International Conference e-Health 2011, Part of the IADIS Multi Conference on Computer Science and Information Systems 2011, MCCSIS 2011*, 262-264, 2011.  
<http://www.scopus.com/inward/record.url?eid=2-s2.0-84865084975&partnerID=40&md5=233634342908c124e67cfb78eadd6792>.

Dowda, M.a, T.L.b McKenzie, D.A.c Cohen, M.M.d Scott, K.R.e Evenson, A.L.f Bedimo-Rung, C.C.g Voorhees, og M.J.C.A.h Almeida. «Commercial venues as supports for physical activity in adolescent girls». *Preventive Medicine* 45, nr. 2-3 (2007): 163-168.

Dubowitz, T.a b, M.a b Williams, E.D.a b Steiner, M.M.a b Weden, L.a b Miyashiro, D.c Jacobson, og N.a b Lurie. «Using geographic information systems to match local health needs with public health services and programs». *American Journal of Public Health* 101, nr. 9 (2011): 1664-1665.

Duczmal, L. H., G. J. P. Moreira, D. Burgarelli, R. H. C. Takahashi, F. C. O. Magalhães, og E. C. Bodevan. «Voronoi distance based prospective space-time scans for point data sets: a dengue fever cluster analysis in a southeast Brazilian town». *International Journal of Health Geographics* 10, nr. 1 (2011): 29.

Dulin, M.F.a, T.M.b Ludden, H.a Tapp, J.b Blackwell, B.U.a De Hernandez, H.A.b Smith, og O.J.b Furuseth. «Using geographic information systems (GIS) to understand a community's primary care needs». *Journal of the American Board of Family Medicine* 23, nr. 1 (2010): 13-21.

Dulin, M.F.a, T.M.b Ludden, H.a Tapp, H.A.b Smith, B.U.a De Hernandez, J.b Blackwell, og O.J.b Furuseth. «Geographic information systems (GIS) demonstrating primary care needs for a transitioning hispanic community». *Journal of the American Board of Family Medicine* 23, nr. 1 (2010): 109-120.

Dummer, T.J.B. «Modelling accessibility to hospital using geographical information systems». *Bulletin of the Society of Cartographers* 37, nr. 1-2 (2003): 13-16.

Duncan, M. J., H. M. Badland, og W. K. Mummery. «Applying GPS to enhance understanding of transport-related physical activity». *Journal of Science and Medicine in Sport* 12, nr. 5 (2009): 549-556.

Edsall, R.M. «Design and usability of an enhanced geographic information system for exploration of multivariate health statistics». *Professional Geographer* 55, nr. 2 (2003): 146-160.

Eiras, A.E.a c, og M.C.a b Resende. «Preliminary evaluation of the 'Dengue-MI' technology for *Aedes aegypti* monitoring and control». *Cadernos de Saude Publica* 25, nr. SUPPL. 1 (2009): S45-S58.

Eisele, T.P.a, J.a Keating, C.b Swalm, C.M.c Mbogo, A.K.d Githeko, J.L.e Regens, J.I.f Githure, L.g Andrews, og J.C.h Beier. «Linking field-based ecological data with remotely sensed data using a geographic information system in two malaria endemic urban areas of Kenya». *Malaria Journal* 2 (2003): 1-17.

Eisen, L., og S. Lozano-Fuentes. «Use of mapping and spatial and space-time modeling approaches in operational control of *Aedes aegypti* and dengue». *PLoS Neglected Tropical Diseases* 3, nr. 4 (2009).  
<http://www.scopus.com/inward/record.url?eid=2-s2.0-65549095062&partnerID=40&md5=35f8b642cb2f25114f48763d53e96665>.

Ekpo, U.F.a, C.F.a Mafiana, C.O.b Adeofun, A.R.T.c Solarin, og A.B.a Idowu. «Geographical information system and predictive risk maps of urinary schistosomiasis in Ogun State, Nigeria». *BMC Infectious Diseases* 8 (2008).  
<http://www.scopus.com/inward/record.url?eid=2-s2.0-46349098082&partnerID=40&md5=881217c3bbc71cebc9228df5ea3cd13e>.

Elkin, E.B.a, N.M.a Ishill, J.G.a Snow, K.S.a Panageas, P.B.a Bach, L.b Liberman, F.c Wang, og D.d Schrag. «Geographic access and the use of screening mammography». *Medical Care* 48, nr. 4 (2010): 349-356.

Ellehoj, E., J. Tepper, B. Barrett, og S. Iglesias. «Research methodology for the investigation of rural surgical services.» *Canadian journal of rural medicine?: the official journal of the Society of Rural Physicians of Canada = Journal canadien de la médecine rurale?: le journal officiel de la Société de médecine rurale du Canada*. 11, nr. 3 (2006): 187-194.

Elliott, P.a, og D.A.b Savitz. «Design issues in small-area studies of environment and health». *Environmental Health Perspectives* 116, nr. 8 (2008): 1098-1104.

Elliott, S.J.a c, J.a Eyles, og P.b Deluca. «Mapping health in the great lakes areas of concern: A user-friendly tool for policy and decision makers». *Environmental Health Perspectives* 109, nr. SUPPL. 6 (2001): 817-826.

Emch, M.a b, C.b c Feldacker, S.M.d Sirajul, og M.e Ali. «Seasonality of cholera from 1974 to 2005: A review of global patterns». *International Journal of Health Geographics* 7 (2008).  
<http://www.scopus.com/inward/record.url?eid=2-s2.0-47949105508&partnerID=40&md5=3dc7b9c28f5a57266e5aeb62337d07a1>.

Emmanuel, N.N.a, N.a Loha, M.O.b Okolo, og O.K.b Ikenna. «Landscape epidemiology: An emerging perspective in the mapping and modelling of disease and disease risk factors». *Asian Pacific Journal of Tropical Disease* 1, nr. 3 (2011): 247-250.

Eriksson, C., G. Bluhm, A. Hilding, C. G. Østenson, og G. Pershagen. «Aircraft noise and incidence of hypertension-gender specific effects». *Environmental research* 110, nr. 8 (2010): 764-772.

Eriksson, C., M. Rosenlund, G. Pershagen, A. Hilding, C. G. Østenson, og G. Bluhm. «Aircraft noise and incidence of hypertension». *Epidemiology* 18, nr. 6 (2007): 716-721.

dos Santos, R.M.Z.a, A.a b Amador, W.V.c de Souza, M.F.P.M.c d de Albuquerque, S.P.b Dawson, A.e Ruffino-Netto, C.R.f Zorate-Bladis, og C.L.f Silva. «A dynamic analysis of tuberculosis dissemination to improve control and surveillance». *PLoS ONE* 5, nr. 11 (2010).  
<http://www.scopus.com/inward/record.url?eid=2-s2.0-78649787212&partnerID=40&md5=3cec2fc33326220de4b64390806b00a5>.

De Souza Dias, M.C.F.a d, G.H.b Dias, og M.L.c Nobre. «The use of Geographical Information System (GIS) to improve active leprosy case finding campaigns in the Municipality of Mossoró, Rio Grande do Norte State, Brazil». *Leprosy Review* 78, nr. 3 (2007): 261-269.

De Toledo Martins, F.a, C.a Da Costa Freitas, L.V.a Dutra, F.R.a Fonseca, R.J.b c De Paula Souza e Guimaraes, R.S.d Do Amaral, A.C.M.e Moura, og O.D.S.b Carvalho. «Risk mapping of the schistosomiasis in the minas gerais state, brazil, using modis and socioeconomic spatial data». *I International Geoscience and Remote Sensing Symposium (IGARSS)*, 1:I268-I271, 2008.  
<http://www.scopus.com/inward/record.url?eid=2-s2.0-67649810229&partnerID=40&md5=1696045e61170be517a3cb44cd4d15b0>.

Escamilla, V.a, B.b Wagner, M.c Yunus, P.K.c Streatfield, A.d van Geen, og M.a Emch. «Effect of deep tube well use on childhood diarrhoea in Bangladesh [Efecto de los pozos profundos entubados en la diarrea infantil en Bangladesh]». *Bulletin of the World Health Organization* 89, nr. 7 (2011): 521-527.

Fang, L.a, L.b Yan, S.b e Liang, S.J.c de Vlas, D.a Feng, X.a Han, W.a Zhao, et al. «Spatial analysis of hemorrhagic fever with renal syndrome in China». *BMC Infectious Diseases* 6 (2006).  
<http://www.scopus.com/inward/record.url?eid=2-s2.0-33646893252&partnerID=40&md5=206e45cef4c16715d482227ff0bc2eec>.

Fang, L.Q., C.Y. Li, H. Yang, X.M. Wu, H. Yang, H.X. Chen, X.W. Li, og W.C. Cao. «Using geographic information system to study on the association between epidemic areas and main animal hosts of hemorrhagic fever with renal syndrome in China.» *Zhonghua liu xing bing xue za zhi = Zhonghua liuxingbingxue zazhi*. 25, nr. 11 (2004): 929-933.

Fang, L.-Q.a b, S.J.b De Vlas, D.a Feng, S.c Liang, Y.-F.a Xu, J.-P.d Zhou, J.H.b Richardus, og W.-C.a Cao. «Geographical spread of SARS in mainland China». *Tropical Medicine and International Health* 14, nr. SUPPL. 1 (2009): 14-20.

Farahani, R. Z., og M. Hekmatfar. *Facility location: concepts, models, algorithms and case studies*. Physica-Verlag HD, 2009.  
<http://www.google.com/books?hl=da&lr=&id=a7JhwTwHveMC&oi=fnd&pg=PA1&dq=Facility+location+-+concepts,+models,+algorithms+and+case+studies&ots=iDHiu9MduR&sig=Yu-Rvcsx9VbeP30vSs6V6EYsmeg>.

Feikin, D.R.a b c, L.M.c Nguyen, K.b Adazu, M.b Ombok, A.b c Audi, L.b d Slutsker, og K.A.b d Lindblade. «The impact of distance of residence from a peripheral health facility on pediatric health utilisation in rural western Kenya». *Tropical Medicine and International Health* 14, nr. 1 (2009): 54-61.

Filho, F.A.a, J.M.a Sant'Ana, R.F.a dos Santos, og C.L.a b Castagna. «Environmental inducers of schistosomiasis mansoni in Campinas, Brazil». *Geospatial Health* 5, nr. 1 (2010): 79-91.

Fischer, E. A. J., D. Pahan, S. K. Chowdhury, og J. H. Richardus. «The spatial distribution of leprosy cases during 15 years of a leprosy control program in Bangladesh: An observational study». *BMC infectious diseases* 8, nr. 1 (2008): 126.

Flanigan, M.a, A.a Blatt, L.b Lombardo, D.c Mancuso, M.d Miller, D.d Wiles, H.d Pirson, J.e Hwang, J.-C.e Thill, og K.e Majka. «Assessment of air medical coverage using the atlas and database of air medical services and correlations with reduced highway fatality rates». *Air Medical Journal* 24, nr. 4 (2005): 151-163.

Flauzino, R.F.a, R.b Souza-Santos, og E.R.M.b Oliveira. «Dengue, geoprocessing, and socioeconomic and environmental indicators: a review [Dengue, geoprocessamento e indicadores socioecon?micos e ambientais: Um estudo de revis?o]». *Revista Panamericana de Salud Publica/Pan American Journal of Public Health* 25, nr. 5 (2009): 456-461.

Fleming, G., M. Merwe, og G. McFerren. «Fuzzy expert systems and GIS for cholera health risk prediction in southern Africa». *Environmental Modelling & Software* 22, nr. 4 (2007): 442-448.

Fortney, J., K. Rost, og J. Warren. «Comparing alternative methods of measuring geographic access to health services». *Health Services and Outcomes Research Methodology* 1, nr. 2 (2000): 173-184.

Fortney, J.a, N.b Chumbler, M.a Cody, og C.a Beck. «Geographic access and service use in a community-based sample of cognitively impaired elders». *Journal of Applied Gerontology* 21, nr. 3 (2002): 352-367.

Frederix, I. «A cardiac patient training companion». I 2nd International Symposium on Applied Sciences in Biomedical and Communication Technologies, ISABEL 2009, 2009. <http://www.scopus.com/inward/record.url?eid=2-s2.0-77949443283&partnerID=40&md5=0c1300310bad9f0d5639dd1c41761245>.

Freitas, C.C.a, R.J.P.S.a Guimaraes, L.V.a Dutra, F.T.a Martins, E.J.C.a Gouvka, R.A.T.b Santos, A.C.M.c Moura, S.C.d Drummond, R.S.e Amaral, og O.S.f Carvalho. «Remote sensing and geographic information systems for the study of schistosomiasis in the state of Minas Gerais, Brazil». I International Geoscience and Remote Sensing Symposium (IGARSS), 2436-2439, 2006. <http://www.scopus.com/inward/record.url?eid=2-s2.0-34948877451&partnerID=40&md5=467fb6191a26f120628059879a8d8b55>.

Fremont, A.M.a d e, A.b Bierman, S.L.c Wickstrom, C.E.a Bird, M.c Shah, J.J.a Escarce, T.c Horstman, og T.c Rector. «Use of geocoding in managed care settings to identify quality disparities». *Health Affairs* 24, nr. 2 (2005): 516-526.

French, S. A., M. Story, og R. W. Jeffery. «Environmental influences on eating and physical activity». *Annual review of public health* 22, nr. 1 (2001): 309-335.

Fuentes, M.V. «Remote sensing and climate data as a key for understanding fasciolosis transmission in the Andes: review and update of an ongoing interdisciplinary project.» *Geospatial health* 1, nr. 1 (2006): 59-70.

Fuentes, M.V.a c, S.a Sainz-Elipse, P.b Nieto, J.B.b Malone, og S.a Mas-Coma. «Geographical Information Systems risk assessment models for zoonotic fasciolosis in the South American Andes region». *Parassitologia* 47, nr. 1 (2005): 151-156.

Fuentes, M.V.a, J.B.b Malone, og S.a Mas-Coma. «Validation of a mapping and prediction model for human fasciolosis transmission in Andean very high altitude endemic areas using remote sensing data». *Acta Tropica* 79, nr. 1 (2001): 87-95.

Fulcher, C.L., og C.E. Kaukinen. «Visualizing the infrastructure of US healthcare using Internet GIS: a community health informatics approach for reducing health disparities.» *Medinfo* 11, nr. Pt 2 (2004): 1197-1201.

Fulcher, C. L., og C. E. Kaukinen. «Visualizing the infrastructure of US healthcare using Internet GIS: a community health informatics approach for reducing health disparities». I *Medinfo 2004: Proceedings Of THE 11th World Congress On Medical Informatics*, 107:1197, 2004. <http://www.google.com/books?hl=da&lr=&id=tsPQ3hdW->

zEC&oi=fnd&pg=PA1197&dq=Visualizing+the+infrastructure+of+US+healthcare+usi  
ng+internet+GIS:+A+community+health+informatics+approach+for+reducing+healt  
h+disparities&ots=KXZhaEuzbg&sig=6XWLsIzvHeI5rat0nHr\_E4jgy54.

Gabrysch, S., S. Cousens, J. Cox, og O. M. R. Campbell. «The influence of distance and level of care on delivery place in rural Zambia: a study of linked national data in a geographic information system». *PLoS medicine* 8, nr. 1 (2011): e1000394.

Gabrysch, S.a, S.b Cousens, J.c Cox, og O.M.R.b Campbell. «The influence of distance and level of care on delivery place in rural Zambia: A study of linked national data in a geographic information system». *PLoS Medicine* 8, nr. 1 (2011). <http://www.scopus.com/inward/record.url?eid=2-s2.0-79951625364&partnerID=40&md5=63ac462810c9a34478e619d891d0ca4c>.

Galli, B.a, og F.C.b c Neto. «Temporal-spatial risk model to identify areas at high-risk for occurrence of dengue fever». *Revista de Saude Publica* 42, nr. 4 (2008): 656-663.

Ganapati, S.a, N.E.a Ganapati, M.b de la Rosa, og P.b Rojas. «Spatial disparity of HIV/AIDS service providers: The case of miami-dade county». *Journal of HIV/AIDS and Social Services* 9, nr. 2 (2010): 169-189.

Gardner, B.R.a b, M.J.a c d Strickland, og A.a Correa. «Application of the automated spatial surveillance program to birth defects surveillance data». *Birth Defects Research Part A - Clinical and Molecular Teratology* 79, nr. 7 (2007): 559-564.

Garnelo, L.a c, L.C.b Brandyo, og A.a Levino. «Dimensions and potentialities of the geographic information system on indigenous health [Dimensões e potencialidades dos sistemas de informação geográfica na saúde indígena]». *Revista de Saude Publica* 39, nr. 4 (2005): 634-640.

Gatrell, A., og M. Senior. «Health and health care applications». *Geographical Information Systems: Principles Techniques Management and Applications* 2 (1999). [http://www.colorado.edu/geography/leyk/geog\\_5113/readings/gatrell\\_senior\\_2005.pdf](http://www.colorado.edu/geography/leyk/geog_5113/readings/gatrell_senior_2005.pdf).

Gazzinelli, A., og H. Kloss. «The use of spatial tools in the study of *Schistosoma mansoni* and its intermediate host snails in Brazil: a brief review.» *Geospatial health* 2, nr. 1 (2007): 51-58.

Geanuracos, C.G., S.D. Cunningham, G. Weiss, D. Forte, L.M. Henry Reid, og J.M. Ellen. «Use of geographic information systems for planning HIV prevention interventions for high-risk youths». *American Journal of Public Health* 97, nr. 11 (2007): 1974-1981.

Gebre-Michael, T.a b, J.B.b Malone, M.a Balkew, A.a Ali, N.a Berhe, A.a Hailu, og A.A.c Herzi. «Mapping the potential distribution of *Phlebotomus martini* and *P. orientalis* (Diptera: Psychodidae), vectors of kala-azar in East Africa by use of geographic information systems». *Acta Tropica* 90, nr. 1 (2004): 73-86.

Gebre-Michael, T.a c, J.B.b Malone, og K.b McNally. «Use of Geographic Information Systems in the development of prediction models for onchocerciasis control in Ethiopia». *Parassitologia* 47, nr. 1 (2005): 135-144.

Geraghty, E.M.a, T.b Balsbaugh, J.b Nuovo, og S.c Tandon. «Using geographic information systems (GIS) to assess outcome disparities in patients with type 2 diabetes and hyperlipidemia». *Journal of the American Board of Family Medicine* 23, nr. 1 (2010): 88-96.

Gerharz, L.E.a, A.a Kröger, og O.b Klemm. «Applying indoor and outdoor modeling techniques to estimate individual exposure to PM2.5 from personal GPS profiles and diaries: A pilot study». *Science of the Total Environment* 407, nr. 18 (2009): 5184-5193.

Gething, P.W.a b, A.M.c f Noor, D.c d e Zurovac, P.M.b Atkinson, S.I.c f Hay, M.S.a Nixon, og R.W.c g Snow. «Empirical modelling of government health service use by children with fevers in Kenya». *Acta Tropica* 91, nr. 3 (2004): 227-237.

Ghetian, C.B.a, R.a Parrott, J.E.a Volkman, og E.J.b Lengerich. «Cancer registry policies in the United States and geographic information systems applications in comprehensive cancer control». *Health Policy* 87, nr. 2 (2008): 185-193.



Ghosh, D.a, S.M.b Manson, og R.B.b McMaster. «Delineating west Nile virus transmission cycles at various scales: The nearest neighbor distance-time model». *Cartography and Geographic Information Science* 37, nr. 2 (2010): 149-163.

Ghosh, S., A. Dasgupta, og S. K. Ghosh. «A geospatial framework for mapping of electromagnetic radiations». I *Proceedings of the 2nd International Conference on Computing for Geospatial Research & Applications*, 29, 2011. <http://dl.acm.org/citation.cfm?id=1999349>.

Gibson, A.a, S.b Asthana, P.b Brigham, G.c Moon, og J.d Dicker. «Geographies of need and the new NHS: Methodological issues in the definition and measurement of the health needs of local populations». *Health and Place* 8, nr. 1 (2002): 47-60.

Gikandi, P. W., A. M. Noor, C. W. Gitonga, A. A. Ajanga, og R. W. Snow. «Access and barriers to measures targeted to prevent malaria in pregnancy in rural Kenya\*». *Tropical Medicine & International Health* 13, nr. 2 (2008): 208-217.

Gikandi, P.W.a c, A.M.a c Noor, C.W.a Gitonga, A.A.a Ajanga, og R.W.a b Snow. «Access and barriers to measures targeted to prevent malaria in pregnancy in rural Kenya». *Tropical Medicine and International Health* 13, nr. 2 (2008): 208-217.

Gilboa, S. M., P. Mendola, A. F. Olshan, C. Harness, D. Loomis, P. H. Langlois, D. A. Savitz, og A. H. Herring. «Comparison of residential geocoding methods in population-based study of air quality and birth defects». *Environmental research* 101, nr. 2 (2006): 256-262.

Giorgio, A. «ICT for telemedicine and health care innovation». *Recent Patents on Biomedical Engineering* 4, nr. 2 (2011): 110-125.

Glass, G.E.a, T.a Shields, B.a Cai, T.L.b Yates, og R.b c Parmenter. «Persistently highest risk areas for hantavirus pulmonary syndrome: Potential sites for refugia». *Ecological Applications* 17, nr. 1 (2007): 129-139.

Goldenberg, J.S., og L.C. Escudero. «Design and implementation of an epidemiological surveillance system for mental health [Diseño y puesta en marcha de un sistema de vigilancia epidemiológica en salud mental]». *Revista Panamericana de Salud Pública/Pan American Journal of Public Health* 11, nr. 2 (2002): 83-92.

Gomez, L.F.a b, O.L.c Sarmiento, D.C.d Parra, T.L.e Schmid, M.e Pratt, E.f Jacoby, A.e Neiman, et al. «Characteristics of the built environment associated with leisure-time physical activity among adults in Bogotá, Colombia: A multilevel study». *Journal of Physical Activity and Health* 7, nr. SUPPL.2 (2010): S196-S203.

Goovaerts, P., og G. M. Jacquez. «Detection of temporal changes in the spatial distribution of cancer rates using local Moran's I and geostatistically simulated spatial neutral models». *Journal of geographical systems* 7, nr. 1 (2005): 137-159.

Graham, A.J.a, P.M.b Atkinson, og F.M.c Danson. «Spatial analysis for epidemiology». *Acta Tropica* 91, nr. 3 (2004): 219-225.

Graves, B.A. «Access to cardiac interventional services in Alabama and Mississippi: a geographical information system analysis.» *Perspectives in health information management / AHIMA, American Health Information Management Association* 7 (2010). <http://www.scopus.com/inward/record.url?eid=2-s2.0-79952020191&partnerID=40&md5=18f5ad6622244253cae08ef6e127d8f8>.

—. «Geographic analysis of cardiac interventional services in Alabama». *Journal of Cardiovascular Nursing* 26, nr. 4 (2011): E1-E11.

Greiling, D. A., G. M. Jacquez, A. M. Kaufmann, og R. G. Rommel. «Space-time visualization and analysis in the Cancer Atlas Viewer». *Journal of geographical systems* 7, nr. 1 (2005): 67-84.

Griffin, T., T.J. Peters, D. Sharp, C. Salisbury, og S. Purdy. «Validation of an improved area-based method of calculating general practice-level deprivation». *Journal of Clinical Epidemiology* 63, nr. 7 (2010): 746-751.

Grusky, O.a, K.b Roberts, A.-N.c Swanson, H.d Rhoades, og M.d Lam. «Staff strategies for improving HIV detection using mobile HIV rapid testing». *Behavioral Medicine* 35, nr. 4 (2009): 101-111.

Gudes, O., E. Kendall, T. Yigitcanlar, V. Pathak, og S. Baum. «Rethinking health planning: a framework for organising information to underpin collaborative health planning» (2010).  
[http://www98.griffith.edu.au/dspace/bitstream/handle/10072/35369/65789\\_1.pdf?sequence=1](http://www98.griffith.edu.au/dspace/bitstream/handle/10072/35369/65789_1.pdf?sequence=1).

Gudes, O., V. Pathak, E. Kendall, og T. Yigitcanlar. «Thinking spatially, acting collaboratively: a GIS-based health decision support system for improving the collaborative health-planning practice». I Proceedings of the HEALTHINF 2011: International Conference on Health Informatics, 148-155, 2011. <http://eprints.qut.edu.au/38372/>.

Gudes, O. a b, V. a Pathak, E. b Kendall, og T. a Yigitcanlar. «Thinking spatially, acting collaboratively: A GIS-based health decision support system for improving the collaborative health-planning practice». I HEALTHINF 2011 - Proceedings of the International Conference on Health Informatics, 148-155, 2011. <http://www.scopus.com/inward/record.url?eid=2-s2.0-79960174841&partnerID=40&md5=e2d9f683d41e7f1ace6ddbc87980d6bd>.

Guimaryes, R.J.P.S. a b, C.C.c Freitas, L.V.c Dutra, A.C.M.d Moura, R.S.e Amaral, S.C.f Drummond, R.G.C.a b Scholte, og O.S.a Carvalho. «Schistosomiasis risk estimation in Minas Gerais State, Brazil, using environmental data and GIS techniques». Acta Tropica 108, nr. 2-3 (2008): 234-241.

Gundogdu, I. B. «Applying linear analysis methods to GIS-supported procedures for preventing traffic accidents: Case study of Konya». Safety Science 48, nr. 6 (2010): 763-769.

Guo, J. a d, Y. a b Xue, C. a Cao, W. c Cao, S. a d Zhong, G. a Cai, X. a Li, og L. c Fang. «Risk factors analysis of high pathogenic avian influenza in mainland China using GIS and remote sensing». I International Geoscience and Remote Sensing Symposium (IGARSS), 287-289, 2006.  
<http://www.scopus.com/inward/record.url?eid=2-s2.0-34948834641&partnerID=40&md5=383bc075a0e272e49f288fdf1f6009b4>.

Guo, J.-G. a, P. b Vounatsou, C.-L. a Cao, J. b Utzinger, H.-Q. a Zhu, D. b Anderegg, Z. a Rong, et al. «A geographic information and remote sensing based model for prediction of Oncomelania hupensis habitats in the Poyang Lake area, China». Acta Tropica 96, nr. 2-3 (2005): 213-222.

Gólden, B., E. Mumcuo?lu, og N. Baykal. «A gis system for ambulatory transportation». I Proceedings of the IASTED International Conference on Biomedical Engineering, 431-435, 2004.  
<http://www.scopus.com/inward/record.url?eid=2-s2.0-11144281895&partnerID=40&md5=55195780b66560bf759df467c9ca46a7>.

Ha, M., H. Im, M. Lee, H. J. Kim, B. C. Kim, Y. M. Gimm, og J. K. Pack. «Radio-frequency radiation exposure from AM radio transmitters and childhood leukemia and brain cancer». American journal of epidemiology 166, nr. 3 (2007): 270-279.

Hadjimitsis, D.G., A. Nisantzi, K. Themistocleous, A. Matsas, og V. Trigkas. «Satellite remote sensing, GIS and sun-photometers for monitoring PM 10 in Cyprus: Issues on public health». I Proceedings of SPIE - The International Society for Optical Engineering. Bd. 7826, 2010.  
<http://www.scopus.com/inward/record.url?eid=2-s2.0-78649532702&partnerID=40&md5=403d747046d5de688cf6f860fe2e0145>.

Hakim, J.A. a c, og A.C. b Bitto. «Comprehensive surveillance, prevention, and control measures for West Nile Virus in Monroe County, Pennsylvania». Environmental Practice 6, nr. 1 (2004): 36-49.

Hanibuchi, T. a, J. b Aida, M. c Nakade, H. d Hirai, og K. e Kondo. «Geographical accessibility to dental care in the Japanese elderly». Community Dental Health 28, nr. 2 (2011): 128-135.

Hansen, W., N. Kalapasev, A. Gillespie, M. Singler, og M. Ball. «Development of a pedestrian walkability database of Northern Kentucky using Geographic Information Systems (GIS).» Journal of physical activity & health 6, nr. 3 (2009): 374.

Hansen, W. a, N. b Kalapasev, A. c Gillespie, M. b Singler, og M. b Ball. «Development of a pedestrian walkability database of northern Kentucky using Geographic Information Systems (GIS)». Journal of Physical Activity and Health 6, nr. 3 (2009): 374-385.

Haque, U.a d, R.b Magalhães, H.L.b Reid, A.C.A.b Clements, S.c Ahmed, A.c Islam, T.d Yamamoto, R.a Haque, og G.E.e Glass. «Spatial prediction of malaria prevalence in an endemic area of Bangladesh». *Malaria Journal* 9, nr. 1 (2010). <http://www.scopus.com/inward/record.url?eid=2-s2.0-77951969851&partnerID=40&md5=df553530198e88dca4ff2a829dc4171f>.

Hassan, M.M. «Arsenic poisoning in Bangladesh: Spatial mitigation planning with GIS and public participation». *Health Policy* 74, nr. 3 (2005): 247-260.

Hassan, M.M.a, og P.J.b Atkins. «Arsenic risk mapping in Bangladesh: A simulation technique of cokriging estimation from regional count data». *Journal of Environmental Science and Health - Part A Toxic/Hazardous Substances and Environmental Engineering* 42, nr. 12 (2007): 1719-1728.

Hassan, M.M.a b, P.J.a Atkins, og C.E.a Dunn. «The spatial pattern of risk from arsenic poisoning: A Bangladesh case study». *Journal of Environmental Science and Health - Part A Toxic/Hazardous Substances and Environmental Engineering* 38, nr. 1 (2003): 1-24.

Heard, N.J., U. Larsen, og D. Hozumi. «Investigating access to reproductive health services using GIS: proximity to services and the use of modern contraceptives in Malawi.» *African journal of reproductive health* 8, nr. 2 (2004): 164-179.

Hellstrøm, L.a b f, L.c d Jørup, B.e Persson, og O.b Axelson. «Using environmental concentrations of cadmium and lead to assess human exposure and close». *Journal of Exposure Analysis and Environmental Epidemiology* 14, nr. 5 (2004): 416-423.

Henneman, P. L., J. L. Garb, G. A. Capraro, H. Li, H. A. Smithline, og R. B. Wait. «Geography and travel distance impact emergency department visits». *The Journal of Emergency Medicine* 40, nr. 3 (2011): 333-339.

Henneman, P.L.a b, J.L.a Garb, G.A.a b Capraro, H.a Li, H.A.a b Smithline, og R.B.a b Wait. «Geography and travel distance impact emergency department visits». *Journal of Emergency Medicine* 40, nr. 3 (2011): 333-339.

Herbreteau, V.a b f, G.b c Salem, M.a d Souris, J.-P.a e Hugot, og J.-P.a Gonzalez. «Sizing up human health through Remote Sensing: Uses and misuses». *Parassitologia* 47, nr. 1 (2005): 63-79.

Hernandez-Avila, J.E.a c, M.H.a Rodriguez, N.E.a Rodriguez, R.a Santos, E.a Morales, C.b Cruz, og J.a Sepúlveda-Amor. «Geographical coverage of the Mexican Healthcare System and a spatial analysis of utilization of its General Hospitals in 1998 [Cobertura geográfica del Sistema Mexicano de Salud y análisis espacial de la utilización de hospitales generales de la Secretaría de Salud en 1998]». *Salud Publica de Mexico* 44, nr. 6 (2002): 519-532.

Hernandez-Avila, J.E.a, R.a Santos-Luna, L.S.a Palacio-Mejva, A.L.a Salgado-Salgado, V.H.a Rvos-Salgado, M.H.b Rodriguez-Lopez, og J.c Sepúlveda-Amor. «Automated geospatial model for health services strategic planning [Modelo geoespacial automatizado para la regionalización operativa en planeación de redes de servicios de salud]». *Salud Publica de Mexico* 52, nr. 5 (2010): 432-446.

Herrmann, S., og B.G. Ragan. «Outcome assessment part 1: Measurement of physical activity». *Athletic Therapy Today* 13, nr. 2 (2008): 25-28.

Higgs, G. «A literature review of the use of GIS-based measures of access to health care services». *Health Services and Outcomes Research Methodology* 5, nr. 2 (2004): 119-139.

—. «The role of GIS for health utilization studies: Literature review». *Health Services and Outcomes Research Methodology* 9, nr. 2 (2009): 84-99.

Higgs, G.a, og M.b Gould. «Is there a role for GIS in the 'new NHS'?» *Health and Place* 7, nr. 3 (2001): 247-259.

Hightower, A.a, R.b Kiptui, A.b Many, A.a Wolkon, J.L.a Vanden Eng, M.a c Hamel, A.d Noor, et al. «Bed net ownership in Kenya: The impact of 3.4 million free bed nets». *Malaria Journal* 9, nr. 1 (2010). <http://www.scopus.com/inward/record.url?eid=2-s2.0-77954339352&partnerID=40&md5=b4f1dc0b82d672d10fcf211620c1bda3>.

Hvjar, M., J. Trostle, og M. Bronfman. «Pedestrian injuries in Mexico: a multi-method approach». *Social Science and Medicine* 57, nr. 11 (2003): 2149-2159.

Hillier, A.a, B.L.b Cole, T.E.c Smith, A.K.b Yancey, J.D.d Williams, S.A.e Grier, og W.J.f McCarthy. «Clustering of unhealthy outdoor advertisements around child-serving institutions: A comparison of three cities». *Health and Place* 15, nr. 4 (2009): 935-945.

Hillsdon, M.a, J.b Panter, C.c Foster, og A.b Jones. «The relationship between access and quality of urban green space with population physical activity». *Public Health* 120, nr. 12 (2006): 1127-1132.

Hiscock, R.a, J.b Pearce, T.c Blakely, og K.d Witten. «Is neighborhood access to health care provision associated with individual-level utilization and satisfaction?» *Health Services Research* 43, nr. 6 (2008): 2183-2200.

Hoang, C.a, G.b Kolenic, E.c Kline-Rogers, K.A.c d Eagle, og S.R.a Erickson. «Mapping geographic areas of high and low drug adherence in patients prescribed continuing treatment for acute coronary syndrome after discharge». *Pharmacotherapy* 31, nr. 10 (2011): 927-933.

Hoerster, K.D., J.A. Mayer, S. Gabbard, R.G. Kronick, S.C. Roesch, V.L. Malcarne, og M.L. Zuniga. «Impact of individual-, environmental-, and policy-level factors on health care utilization among US farmworkers.» *American journal of public health* 101, nr. 4 (2011): 685-692.

Hoeven, T.A.a, E.A.J.a Fischer, D.b Pahan, og J.H.a Richardus. «Social distance and spatial distance are not the same, observations on the use of GIS in leprosy epidemiology». *Epidemiology and Infection* 136, nr. 12 (2008): 1624-1627.

Horner, M.W.a b, og A.K.c Mascarenhas. «Analyzing location-based accessibility to dental services: An Ohio case study». *Journal of Public Health Dentistry* 67, nr. 2 (2007): 113-118.

Horst, M. A., og A. S. Coco. «Observing the spread of common illnesses through a community: using geographic information systems (GIS) for surveillance». *The Journal of the American Board of Family Medicine* 23, nr. 1 (2010): 32-41.

Horst, M.A.a c, og A.S.b Coco. «Observing the spread of common illnesses through a community: Using geographic information systems (GIS) for surveillance». *Journal of the American Board of Family Medicine* 23, nr. 1 (2010): 32-41.

Houghton, F. «Reflections on the science and art 1 of using a GIS to locate a new national children's hospital in Ireland». *Irish Geography* 42, nr. 2 (2009): 245-252.

Hu, W., A. Clements, G. Williams, S. Tong, og others. «Spatial analysis of notified dengue fever infections». *Epidemiology and infection* 139, nr. 3 (2011): 391-399.

Hu, Z.a, J.a Liebens, og R.b Rao. «Exploring relationship between asthma and air pollution: A geospatial methodology using dasymetric mapping, GIS analysis, and spatial statistics». I *Proceedings of SPIE - The International Society for Optical Engineering*. Bd. 6753, 2007. <http://www.scopus.com/inward/record.url?eid=2-s2.0-36448947988&partnerID=40&md5=14eb1f1b576a5542264393bbadb98b65>.

Huang, C.-Y.a, og T.-H.b Wen. «A multilayer epidemic simulation framework integrating geographic information system with traveling networks». I *Proceedings of the World Congress on Intelligent Control and Automation (WCICA), 2002-2007, 2010*. <http://www.scopus.com/inward/record.url?eid=2-s2.0-77958149782&partnerID=40&md5=85188c9c8d2e71d2a9ae4cd52493bf4b>.

Hunter, P.D., A.N. Tyler, D.J. Gilvear, og N.J. Willby. «Using remote sensing to aid the assessment of human health risks from blooms of potentially toxic cyanobacteria». *Environmental Science and Technology* 43, nr. 7 (2009): 2627-2633.

Hussain, M.a b, M.H.a b Arsalan, og M.R.a b Mehdi. «Role of GIS in public health management in Pakistan». *IEEE Aerospace and Electronic Systems Magazine* 23, nr. 7 (2008): 39-45.

Haase, I.a, S.a Olson, M.A.b c Behr, I.d e Wanyeki, L.f Thibert, A.d e Scott, A.d e Zwerling, et al. «Use of geographic and genotyping tools to characterise tuberculosis transmission in Montreal». *International Journal of Tuberculosis and Lung Disease* 11, nr. 6 (2007): 632-638.

Iidowu, P., D. Cornford, og L. Bastin. «A Conceptual data model for disease surveillance, monitoring and prediction in nigeria». I HEALTHINF 2009 - Proceedings of the 2nd International Conference on Health Informatics, 442-449, 2009. <http://www.scopus.com/inward/record.url?eid=2-s2.0-77954658892&partnerID=40&md5=06da33f935fb3a837d5457f436fcc129>.

Isakov, V., J. S. Touma, J. Burke, D. T. Lobdell, T. Palma, A. Rosenbaum, og Halük kØzkaynak. «Combining regional-and local-scale air quality models with exposure models for use in environmental health studies». Journal of the Air & Waste Management Association 59, nr. 4 (2009): 461-472.

Jacob, B.G.a, N.D.b Burkett-Cadena, J.C.c Luvall, S.H.d Parcak, C.J.W.e McClure, L.K.e Estep, G.E.e Hill, E.W.f Cupp, R.J.a Novak, og T.R.g Unnasch. «Developing GIS-based eastern equine encephalitis vector-host models in Tuskegee, Alabama». International Journal of Health Geographics 9 (2010). <http://www.scopus.com/inward/record.url?eid=2-s2.0-77950437361&partnerID=40&md5=9e3836364b6899b592e63eec493flaf3>.

Jacquez, G.M. «Spatial analysis in epidemiology: Nascent science or a failure of GIS?» Journal of Geographical Systems 2, nr. 1 (2000): 91-97.

Jarup, L., N. Best, M. B. Toledano, J. Wakefield, og P. Elliott. «Geographical epidemiology of prostate cancer in Great Britain». International journal of cancer 97, nr. 5 (2002): 695-699.

Jarup, L. «Health and environment information systems for exposure and disease mapping, and risk assessment». Environmental Health Perspectives 112, nr. 9 (2004): 995.

Jaworek, J., og P. Augustyniak. «Heart rate monitoring system dedicated for cardiac telerehabilitation». I IFMBE Proceedings, 37:462-465, 2011. <http://www.scopus.com/inward/record.url?eid=2-s2.0-80455178481&partnerID=40&md5=f3bdf8fef5d1d6b79bd406829e1d64d9>.

Jayakumar, D.a, S.a Kavitha, S.b Rathinam, og G.a Vasanthi. «Geomapping of trematode-induced granulomatous anterior uveitis - a newly identified cause of blindness among children in the Pudukkottai district of the Tamil Nadu state, India». Geospatial Health 4, nr. 1 (2009): 55-63.

Jeanne, I. «Malaria and schistosomiasis: Two examples using systems of geographical information and teledetection in Madagascar [Paludisme et schistosomose: Deux exemples d'utilisation des systØmes d'information géographique et de la télédetection ũ Madagascar]». Bulletin de la Societe de Pathologie Exotique 93, nr. 3 (2000): 208-214.

Jeefoo, P., N. K. Tripathi, og M. Souris. «Spatio-temporal diffusion pattern and hotspot detection of dengue in Chachoengsao Province, Thailand». International journal of environmental research and public health 8, nr. 1 (2010): 51-74.

Jeefoo, P., N.K. Tripathi, M. Souris, V. Phonekeoa, og S. Pirasteh. «Exploring geospatial factors contributing to malaria prevalence in kanchanaburi, Thailand». International Journal of Geoinformatics 5, nr. 1 (2009): 21-26.

Jeefoo, P.a, N.K.a Tripathi, og M.a b c Souris. «Spatio-temporal diffusion pattern and hotspot detection of dengue in Chachoengsao province, Thailand». International Journal of Environmental Research and Public Health 8, nr. 1 (2011): 51-74.

Jenkins, T.M.a, K.L.b Chapman, C.S.c d Ritchie, D.K.e Arnett, G.e McGwin, S.S.f Cofield, og H.M.e Maetz. «Hospice use in Alabama, 2002-2005». Journal of Pain and Symptom Management 41, nr. 2 (2011): 374-382.

Jenkins, T.M.a, S.A.b Xanthakos, M.H.c Zeller, S.J.a Barnett, og T.H.a Inge. «Distance to clinic and follow-up visit compliance in adolescent gastric bypass cohort». Surgery for Obesity and Related Diseases 7, nr. 5 (2011): 611-615.

Jerrett, M., M. M. Finkelstein, J. R. Brook, M. A. Arain, P. Kanaroglou, D. M. Stieb, N. L. Gilbert, et al. «A cohort study of traffic-related air pollution and mortality in Toronto, Ontario, Canada». Environmental health perspectives 117, nr. 5 (2009): 772.

Jex, A.R.a, Y.A.L.b Lim, J.c M. Bethony, P.J.c Hotez, N.D.a Young, og R.B.a Gasser. «Soil-transmitted helminths of humans in Southeast Asia-towards integrated control». Advances in Parasitology 74, nr. C (2011): 231-265.

Jeyaram, A.a, D.a Dutta, A.b Palit, A.a Bajpai, og Y.V.N.c Krishna Murthy. «Geo-spatial modelling of infectious disease outbreaks and risk zoning in the state of West Bengal, India». I 60th International Astronautical Congress 2009, IAC 2009, 3:2479-2499, 2009.  
<http://www.scopus.com/inward/record.url?eid=2-s2.0-77953503629&partnerID=40&md5=c47c6c250c49999de34f2223ee624ff1>.

Jim, R., E. Johnson, og B.I. Pavlin. «Role of GIS technology during leprosy elimination efforts in Pohnpei.» *Pacific health dialog* 16, nr. 1 (2010): 109-114.

Jiménez-Moleón, M.C., og M.A. Gómez-Albores. «Waterborne diseases in the state of Mexico, Mexico (2000-2005)». *Journal of Water and Health* 9, nr. 1 (2011): 200-207.

Johnson, D. P., J. S. Wilson, og G. C. Luber. «International Journal of Health Geographics». *International Journal of Health Geographics* 8 (2009): 57.

Johnson, D.P.a, J.S.a Wilson, og G.C.b Luber. «Socioeconomic indicators of heat-related health risk supplemented with remotely sensed data». *International Journal of Health Geographics* 8 (2009): 57.

Johnson, G.D.a b, M.a c e Eidson, K.a Schmit, A.a Ellis, og M.d Kulldorff. «Geographic prediction of human onset of West Nile virus using dead crow clusters: An evaluation of year 2002 data in New York State». *American Journal of Epidemiology* 163, nr. 2 (2006): 171-180.

Johnson, G.D.a b. «Prospective spatial prediction of infectious disease: Experience of New York State (USA) with West Nile Virus and proposed directions for improved surveillance». *Environmental and Ecological Statistics* 15, nr. 3 (2008): 293-311.

Jones, A. P., R. Haynes, V. Sauerzapf, S. M. Crawford, H. Zhao, D. Forman, og others. «Travel times to health care and survival from cancers in Northern England.» *European journal of cancer (Oxford, England: 1990)* 44, nr. 2 (2008): 269.

Jones, A.P.a, R.a Haynes, V.a Sauerzapf, S.M.b Crawford, H.a Zhao, og D.c Forman. «Travel times to health care and survival from cancers in Northern England». *European Journal of Cancer* 44, nr. 2 (2008): 269-274.

Jones, S. G., A. J. Ashby, S. R. Momin, og A. Naidoo. «Spatial implications associated with using Euclidean distance measurements and geographic centroid imputation in health care research». *Health services research* 45, nr. 1 (2009): 316-327.

Joseph, H.a, J.b Moloney, F.c Maiava, S.d McClintock, P.d Lammie, og W.a Melrose. «First evidence of spatial clustering of lymphatic filariasis in an *Aedes polynesiensis* endemic area». *Acta Tropica* 120, nr. SUPPL. 1 (2011): S39-S47.

Joyce Fan, Z.a, D.T.b Lackland, S.R.b Lipsitz, J.S.b Nicholas, B.M.c Egan, W.d Tim Garvey, og F.N.e Hutchison. «Geographical patterns of end-stage renal disease incidence and risk factors in rural and urban areas of South Carolina». *Health and Place* 13, nr. 1 (2007): 179-187.

Juarez, P.D.a, P.L.b Robinson, og P.b Matthews-Juarez. «100% Access, zero health disparities, and GIS: An improved methodology for designating Health Professions Shortage Areas». *Journal of Health and Social Policy* 16, nr. 1-2 (2002): 155-167.

Kabatereine, N.B.a c, S.b d Brooker, E.M.a c Tukahebwa, F.a c Kazibwe, og A.W.a c Onapa. «Epidemiology and geography of *Schistosoma mansoni* in Uganda: Implications for planning control». *Tropical Medicine and International Health* 9, nr. 3 (2004): 372-380.

Kakani, S., A. Desiræ Labeaud, og C.H. King. «Planning for Rift Valley fever virus: Use of geographical information systems to estimate the human health threat of white-tailed deer (*Odocoileus virginianus*)-related transmission». *Geospatial Health* 5, nr. 1 (2010): 33-43.

Kalluri, S.a, P.b Gilruth, D.c d Rogers, og M.e Szczur. «Surveillance of arthropod vector-borne infectious diseases using remote sensing techniques: A review». *PLoS Pathogens* 3, nr. 10 (2007): 1361-1371.

Kamanga, A.a, P.a Moono, G.b Stresman, S.a Mharakurwa, og C.b Shiff. «Rural health centres, communities and malaria case detection in Zambia using mobile telephones: A means to detect potential reservoirs of infection in

unstable transmission conditions». *Malaria Journal* 9, nr. 1 (2010).  
<http://www.scopus.com/inward/record.url?eid=2-s2.0-77950798377&partnerID=40&md5=782b875d1faaa8988951695713e8ba83>.

Kamel Boulos, M.N., A.V. Roudsari, og E.R. Carson. «Health geomatics: An enabling suite of technologies in health and healthcare». *Journal of Biomedical Informatics* 34, nr. 3 (2001): 195-219.

Kamiya, M., J. Trinipil Lagapa, og Y. Oku. «Research on targeting sources of alveolar echinococcosis in Japan». *Comparative immunology, microbiology and infectious diseases* 30, nr. 5 (2007): 427-448.

Kamiya, M.a, J.a b Trinipil Lagapa, og Y.c Oku. «Research on targeting sources of alveolar echinococcosis in Japan». *Comparative Immunology, Microbiology and Infectious Diseases* 30, nr. 5-6 (2007): 427-448.

Kandwal, R., P.K. Garg, og R.D. Garg. «Health GIS and HIV/AIDS studies: Perspective and retrospective». *Journal of Biomedical Informatics* 42, nr. 4 (2009): 748-755.

Kaneko, Y., T. Takano, og K. Nakamura. «Visual localisation of community health needs to rational decision-making in public health services». *Health and Place* 9, nr. 3 (2003): 241-251.

Kaya, S., J. Sokol, og T.J. Pultz. «Monitoring environmental indicators of vector-borne disease from space: A new opportunity for RADARSAT-2». *Canadian Journal of Remote Sensing* 30, nr. 3 (2004): 560-565.

Kazda, M.J.a, E.R.a Beel, D.a Villegas, J.G.b Martinez, N.c Patel, og W.a Migala. «Methodological complexities and the use of GIS in conducting a community needs assessment of a large U.S. municipality». *Journal of Community Health* 34, nr. 3 (2009): 210-215.

Kelly-Hope, L.A.a i, P.J.b Diggle, B.S.b Rowlingson, J.O.c Gyapong, D.d Kyelem, M.a Coleman, M.C.e Thomson, et al. «Short communication: Negative spatial association between lymphatic filariasis and malaria in West Africa». *Tropical Medicine and International Health* 11, nr. 2 (2006): 129-135.

Kestens, Y., og M. Daniel. «Social inequalities in food exposure around schools in an urban area». *American journal of preventive medicine* 39, nr. 1 (2010): 33-40.

Khan, O.A.a b c, W.d Davenhall, M.e Ali, C.f g Castillo-Salgado, G.h Vazquez-Prokopec, U.h i Kitron, R.J.S.j Magalhães, og A.C.A.j k Clements. «Geographical information systems and tropical medicine». *Annals of Tropical Medicine and Parasitology* 104, nr. 4 (2010): 303-318.

Khan, W.A.a, D.A.b Sack, S.a Ahmed, C.S.a Prue, M.S.a Alam, R.a Haque, J.a Khyang, et al. «Mapping hypoendemic, seasonal malaria in rural Bandarban, Bangladesh: A prospective surveillance». *Malaria Journal* 10 (2011).  
<http://www.scopus.com/inward/record.url?eid=2-s2.0-79955831000&partnerID=40&md5=6f94d16f45d3402cc98c6e62c44601b8>.

Khormi, H.M., og L. Kumar. «Examples of using spatial information technologies for mapping and modeling mosquito-borne diseases based on environmental, climatic and socio-economic factors and different spatial statistics, temporal risk indices and spatial analysis: A review». *Journal of Food, Agriculture and Environment* 9, nr. 2 (2011): 41-49.

—. «Modeling dengue fever risk based on socioeconomic parameters, nationality and age groups: GIS and remote sensing based case study». *Science of the Total Environment* 409, nr. 22 (2011): 4713-4719.

Kim, B. J., J. W. Kwon, J. H. Seo, H. B. Kim, S. Y. Lee, K. S. Park, J. Yu, et al. «Association of ozone exposure with asthma, allergic rhinitis, and allergic sensitization». *Annals of Allergy, Asthma & Immunology* 107, nr. 3 (2011): 214-219.

Kim, D., M.A.O. Galeano, A. Hull, og M.L. Miranda. «A framework for widespread replication of a highly spatially resolved childhood lead exposure risk model». *Environmental Health Perspectives* 116, nr. 12 (2008): 1735-1739.

King, R.J.a c, D.H.b Campbell-Lendrum, og C.R.b Davies. «Predicting Geographic Variation in Cutaneous Leishmaniasis, Colombia». *Emerging Infectious Diseases* 10, nr. 4 (2004): 598-607.

Kistemann, T.a c, F.a Dangendorf, og J.b Schweikart. «New perspectives on the use of Geographical Information Systems (GIS) in environmental health

sciences». *International Journal of Hygiene and Environmental Health* 205, nr. 3 (2002): 169-181.

Kistemann, T.a c, og M.-A.b Schrøer. «Small-scale care by SHI physicians and their subjective choice of location within an oversupplied planning area [Kleinrðumige kassenðrztliche versorgung und subjektives standortwahlverhalten von vertragsðrzten in einem oberversorgten planungsgebiet]». *Gesundheitswesen* 69, nr. 11 (2007): 593-600.

Kistemann, T.a, og J.b Schweikart. «From disease ecology towards a geography of health [Von der Krankheitsøkologie zur Geographie der Gesundheit]». *Geographische Rundschau* 62, nr. 7-8 (2010): 4-10.

Kittayapong, P.a b, S.c Yoksan, U.b Chansang, C.b Chansang, og A.d Bhumiratana. «Suppression of dengue transmission by application of integrated vector control strategies at sero-positive GIS-based foci». *American Journal of Tropical Medicine and Hygiene* 78, nr. 1 (2008): 70-76.

Klauss, G., L. Staub, M. Widmer, og A. Busato. «Hospital service areas—a new tool for health care planning in Switzerland». *BMC health services research* 5, nr. 1 (2005): 33.

Kleinschmidt, I.a h, J.b Omumbo, O.c Brit, N.d Van De Giesen, N.e Sogoba, N.K.f Mensah, P.g Windmeijer, M.c Moussa, og T.c Teuscher. «An empirical malaria distribution map for West Africa». *Tropical Medicine and International Health* 6, nr. 10 (2001): 779-786.

Kligerman, M., J. F. Sallis, S. Ryan, L. D. Frank, og P. R. Nader. «Association of neighborhood design and recreation environment variables with physical activity and body mass index in adolescents». *American Journal of Health Promotion* 21, nr. 4 (2007): 274-277.

Kligerman, M.a, J.F.a d Sallis, S.a Ryan, L.D.b Frank, og P.R.c Nader. «Association of neighborhood design and recreation environment variables with physical activity and body mass index in adolescents». *American Journal of Health Promotion* 21, nr. 4 (2007): 274-277.

Koh, H.K.a d, C.M.a Judge, B.b Ferrer, og S.T.c Gershman. «Using public health data systems to understand and eliminate cancer disparities». *Cancer Causes and Control* 16, nr. 1 (2005): 15-26.

Konrad, S.K.a, S.N.a Miller, og W.K.b Reeves. «A spatially explicit degree-day model of Rift Valley fever transmission risk in the continental United States». *GeoJournal* 76, nr. 3 (2011): 257-266.

Krause, D.a b, D.A.c Frate, og W.L.c May. «Demographics and distribution of dentists in Mississippi: A dental work force study». *Journal of the American Dental Association* 136, nr. 5 (2005): 668-677.

Kravets, N.a, og W.C.b Hadden. «The accuracy of address coding and the effects of coding errors». *Health and Place* 13, nr. 1 (2007): 293-298.

Krefis, A.C.a, N.G.a Schwarz, B.c Nkrumah, S.c Acquah, W.a Loag, J.e Oldeland, N.c Sarpong, Y.d Adu-Sarkodie, U.b Ranft, og J.a May. «Spatial analysis of land cover determinants of malaria incidence in the Ashanti Region, Ghana». *PLoS ONE* 6, nr. 3 (2011).  
<http://www.scopus.com/inward/record.url?eid=2-s2.0-79952915543&partnerID=40&md5=05c1dfaf1d9537766a8849f6dd927327>.

Kreuels, B.a, R.a Kobbe, S.c Adjei, C.a b Kreuzberg, C.a Von Reden, K.a Bðter, S.a Klug, W.a Busch, O.c Adjei, og J.a d May. «Spatial variation of malaria incidence in young children from a geographically homogeneous area with high endemicity». *Journal of Infectious Diseases* 197, nr. 1 (2008): 85-93.

Krieger, N.a b, J.T.a Chen, P.D.a Waterman, M.-J.a Soobader, S.V.a Subramanian, og R.a Carson. «Geocoding and monitoring of US socioeconomic inequalities in mortality and cancer incidence: Does the choice of area-based measure and geographic level matter? The public health disparities geocoding project». *American Journal of Epidemiology* 156, nr. 5 (2002): 471-482.

Kruger, D.J., J.S. Brady, og L.A. Shirey. «Using GIS to facilitate community-based public health planning of diabetes intervention efforts.» *Health promotion practice* 9, nr. 1 (2008): 76-81.

Krumholz, H.M.a b c, A.R.d Merrill, E.M.d Schone, G.C.a Schreiner, J.a Chen, E.H.b Bradley, Y.a c Wang, et al. «Patterns of hospital performance in acute myocardial infarction and heart failure 30-day mortality and



readmission». *Circulation: Cardiovascular Quality and Outcomes* 2, nr. 5 (2009): 407-413.

Kumarapeli, V.a b, og T.a Awerbuch-Friedlander. «Human rabies focusing on dog ecology-A challenge to public health in Sri Lanka». *Acta Tropica* 112, nr. 1 (2009): 33-37.

Lahti-Koski, M.a b d, O.a Taskinen, M.a Similä, S.a Mõnnistø, T.a Laatikainen, P.c Knekt, og L.M.a Valsta. «Mapping geographical variation in obesity in Finland». *European Journal of Public Health* 18, nr. 6 (2008): 637-643.

Lambert, T.W.a, J.b Boehmer, J.c Feltham, L.d Guyn, og R.e Shahid. «Spatial mapping of lead, arsenic, iron, and polycyclic aromatic hydrocarbon soil contamination in Sydney, Nova Scotia: Community impact from the coke ovens and steel plant». *Archives of Environmental and Occupational Health* 66, nr. 3 (2011): 128-145.

Lapa, T.M.a c, M.D.F.P.M.a De Albuquerque, M.S.b Carvalho, og J.C.a Silveira Jr. «Spatial analysis of leprosy cases treated at public health care facilities in Brazil [Análise da demanda de casos de hansenose aos serviços de saúde através do uso de técnicas de análise espacial]». *Cadernos de Saude Publica* 22, nr. 12 (2006): 2575-2583.

Lee, J. E., J. H. Sung, W. B. Ward, P. J. Fos, W. J. Lee, og J. C. Kim. «Utilization of the emergency room: impact of geographic distance». *Geospatial Health* 1, nr. 2 (2007): 243-253.

Lee, J.E., J.H. Sung, W.B. Ward, P.J. Fos, W.J. Lee, og J.C. Kim. «Utilization of the emergency room: impact of geographic distance.» *Geospatial health* 1, nr. 2 (2007): 243-253.

Lee, S.S., og N.S. Wong. «The clustering and transmission dynamics of pandemic influenza A (H1N1) 2009 cases in Hong Kong». *Journal of Infection* 63, nr. 4 (2011): 274-280.

Leonardo, L. R., B. A. Crisostomo, J. A. A. Solon, P. T. Rivera, A. B. Marcelo, og J. M. Villasper. «Geographical information systems in health research and services delivery in the Philippines». *Geospatial Health* 1, nr. 2 (2007): 147-155.

Leonardo, L.R., B.A. Crisostomo, J.A. Solon, P.T. Rivera, A.B. Marcelo, og J.M. Villasper. «Geographical information systems in health research and services delivery in the Philippines.» *Geospatial health* 1, nr. 2 (2007): 147-155.

Leonardo, L.R.a e, P.T.a Rivera, B.A.b Crisostomo, J.N.a Sarol, N.C.c Bantayan, W.U.a Tiu, og N.R.d Bergquist. «A study of the environmental determinants of malaria and schistosomiasis in the Philippines using Remote Sensing and Geographic Information Systems». *Parassitologia* 47, nr. 1 (2005): 105-114.

Leslie, E., N. Coffee, L. Frank, N. Owen, A. Bauman, og G. Hugo. «Walkability of local communities: using geographic information systems to objectively assess relevant environmental attributes». *Health & place* 13, nr. 1 (2007): 111-122.

Leung, Y. W., J. Brual, A. Macpherson, og S. L. Grace. «Geographic issues in cardiac rehabilitation utilization: a narrative review». *Health & Place* 16, nr. 6 (2010): 1196-1205.

Leung, Y.W.a, J.b Brual, A.a Macpherson, og S.L.a c Grace. «Geographic issues in cardiac rehabilitation utilization: A narrative review». *Health and Place* 16, nr. 6 (2010): 1196-1205.

Leveque, A., P. C. Humblet, og R. Lagasse. «Atlas of avoidable mortality in Belgium 1985-1989». *Arch Public Health* 57 (1999): 1-87.

Lewis, M. D., J. A. Pavlin, J. L. Mansfield, S. O'Brien, L. G. Boomsma, Y. Elbert, og P. W. Kelley. «Disease outbreak detection system using syndromic data in the greater Washington DC area». *American journal of preventive medicine* 23, nr. 3 (2002): 180-186.

Lian, M.a d, R.D.b Warner, J.L.c Alexander, og K.R.a Dixon. «Using geographic information systems and spatial and space-time scan statistics for a population-based risk analysis of the 2002 equine West Nile epidemic in six contiguous regions of Texas». *International Journal of Health Geographics* 6 (2007). <http://www.scopus.com/inward/record.url?eid=2-s2.0-36649025429&partnerID=40&md5=a67594113cc7dcd7c7332b699a921718>.

Lin, C.-C.a, M.-J.b Chiu, C.-C.c Hsiao, R.-G.d Lee, og Y.-S.e Tsai. «Wireless health care service system for elderly with dementia». IEEE Transactions on Information Technology in Biomedicine 10, nr. 4 (2006): 696-704.

Lin, G., J. Gray, M. Qu, og others. «Improving geocoding outcomes for the Nebraska Cancer Registry: learning from proven practices.» Journal of registry management 37, nr. 2 (2010): 49.

Lin, H.a, Q.a Liu, J.b Guo, J.b Zhang, J.c Wang, og H.a Chen. «Analysis of the geographic distribution of HFRS in Liaoning Province between 2000 and 2005». BMC Public Health 7 (2007).  
<http://www.scopus.com/inward/record.url?eid=2-s2.0-38149051392&partnerID=40&md5=e593132a8671d8f90c765a80579d2648>.

Lin, S.-J. «Access to community pharmacies by the elderly in Illinois: A geographic information systems analysis». Journal of Medical Systems 28, nr. 3 (2004): 301-309.

Lin, Y., og C. Heffernan. «Creating a mobile-phone based geographic surveillance system for avian influenza». I 2009 International Conference on Information and Communication Technologies and Development, ICTD 2009 - Proceedings, 480, 2009. <http://www.scopus.com/inward/record.url?eid=2-s2.0-77951568837&partnerID=40&md5=159c3e9e8e904ee0be453ccc7a386463>.

Linda, B.a, S.b Hodgson, J.J.c Abellan, S.d LeFevre, og L.a Jarup. «Evaluation of spatial relationships between health and the environment: The rapid inquiry facility». Environmental Health Perspectives 118, nr. 9 (2010): 1306-1312.

Lindgren, A., E. Stroh, P. Montnumery, U. Nihlun, K. Jakobsson, og A. Axmon. «Traffic-related air pollution associated with prevalence of asthma and COPD/chronic bronchitis. A cross-sectional study in Southern Sweden». International journal of health geographics 8, nr. 1 (2009): 2.

Liszka, K.J.a d, M.A.b Mackin, M.J.b Lichter, D.W.b York, D.c e Pillai, og D.S.c Rosenbaum. «Keeping a beat on the heart». IEEE Distributed Systems Online 5, nr. 11 (2004). <http://www.scopus.com/inward/record.url?eid=2-s2.0-10444260406&partnerID=40&md5=b38deefe8527bce627fb5ea0c71ce2b5>.

Liu, G. C., J. S. Wilson, R. Qi, og J. Ying. «Green neighborhoods, food retail and childhood overweight: differences by population density». American Journal of Health Promotion 21, nr. 4s (2007): 317-325.

Liu, H.a, Q.b Weng, og D.c Gaines. «Geographic incidence of human West Nile virus in northern Virginia, USA, in relation to incidence in birds and variations in urban environment». Science of the Total Environment 409, nr. 20 (2011): 4235-4241.

—. «Spatio-temporal analysis of the relationship between WNV dissemination and environmental variables in Indianapolis, USA». International Journal of Health Geographics 7 (2008).  
<http://www.scopus.com/inward/record.url?eid=2-s2.0-58249102252&partnerID=40&md5=44ab0194d3f1a4f949fee80626d90d26>.

Liu, Y.L., C.J. Wei, L. Yan, T.H. Chi, X.B. Wu, og C.S. Xiao. «Analysis of spatial distribution and transmission characters for highly pathogenic avian influenza in Chinese mainland in 2004». I Proceedings of SPIE - The International Society for Optical Engineering. Bd. 6200, 2006.  
<http://www.scopus.com/inward/record.url?eid=2-s2.0-33745817797&partnerID=40&md5=14fabd34c784788b53c3ae32f0380dfd>.

Lloyd, O. L., W. Tze-Wai, W. Siu-Lan, og Y. T. S. Ignatius. Atlas of disease mortalities in Hong Kong for the three five-year periods in 1979-93. Chinese University Press, 1996.  
<http://www.google.com/books?hl=da&lr=&id=2qgB62lr0OgC&oi=fnd&pg=PR13&dq=Atlas+of+disease+mortalities+in+hong+kong+for+the+three+five-year+periods+in+1979-93&ots=aALiPDZvj&sig=WCcdhjEc-salc2H2Ena2oCPfdRU>.

Loh, C. P. A., S. C. Cobb, og C. K. Johnson. «Potential and actual accessibility to hospital and hospital services in Northeast Florida». southeastern geographer 49, nr. 2 (2009): 171-184.

Loyola, E., C. Castillo-Salgado, P. Nájera-Aguilar, M. Vidaurre, O.J. Mujica, og R. Martvnez-Piedra. «Geographic information systems as a tool for monitoring health inequalities [Los sistemas de informacion geografica como herramienta para monitorear las desigualdades de salud]». Revista

Panamericana de Salud Publica/Pan American Journal of Public Health 12, nr. 6 (2002): 415-428.

Lozano-Fuentes, S.a, D.a Elizondo-Quiroga, J.A.b Farfan-Ale, M.A.b Loropopino, J.b Garcia-Rejon, S.c Gomez-Carro, V.c Lira-Zumbardo, et al. «Use of Google Earth™ to strengthen public health capacity and facilitate management of vector-borne diseases in resource-poor environments». Bulletin of the World Health Organization 86, nr. 9 (2008): 718-725.

Lu, X. «Web GIS based information visualization for infectious disease prevention». I 3rd International Symposium on Intelligent Information Technology Application, IITA 2009, 1:148-151, 2009.  
<http://www.scopus.com/inward/record.url?eid=2-s2.0-77649283033&partnerID=40&md5=4f927d1f6d0eal63dac938051cf8e5fb>.

Luber, G., og M. McGeehin. «Climate change and extreme heat events». American journal of preventive medicine 35, nr. 5 (2008): 429-435.

Luo, W., og Y. Qi. «An enhanced two-step floating catchment area (E2SFCA) method for measuring spatial accessibility to primary care physicians». Health and Place 15, nr. 4 (2009): 1100-1107.

Luo, W., og F. Wang. «Measures of spatial accessibility to health care in a GIS environment: Synthesis and a case study in the Chicago region». Environment and Planning B: Planning and Design 30, nr. 6 (2003): 865-884.

Luo, W.a, F.a Wang, og C.b Douglass. «Temporal changes of access to primary health care in Illinois (1990-2000) and policy implications». Journal of Medical Systems 28, nr. 3 (2004): 287-299.

Luque Fernández, M.T.a, P.R.b Mason, H.c Gray, A.a Bauernfeind, J.F.d Fesselet, og P.c Maes. «Descriptive spatial analysis of the cholera epidemic 2008-2009 in Harare, Zimbabwe: A secondary data analysis». Transactions of the Royal Society of Tropical Medicine and Hygiene 105, nr. 1 (2011): 38-45.

Lwasa, S. «Geospatial analysis and decision support for health services planning in Uganda». Geospatial Health 2, nr. 1 (2007): 29-40.

—. «Geospatial analysis and decision support for health services planning in Uganda.» Geospatial health 2, nr. 1 (2007): 29-40.

Machault, V.a b c d, C.c Vignolles, F.b Pag0s, L.e Gadiaga, A.e Gaye, C.e Sokhna, J.-F.e Trape, J.-P.d Lacaux, og C.a Rogier. «Spatial heterogeneity and temporal evolution of malaria transmission risk in Dakar, Senegal, according to remotely sensed environmental data». Malaria Journal 9, nr. 1 (2010). <http://www.scopus.com/inward/record.url?eid=2-s2.0-77956463281&partnerID=40&md5=78ae4885804ef8a53ab5371a537f8e35>.

Machault, V.a b c, C.c Vignolles, F.d Borchini, P.e f Vounatsou, F.a Pages, S.a Briolant, J.-P.b Lacaux, og C.a g Rogier. «The use of remotely sensed environmental data in the study of malaria». Geospatial Health 5, nr. 2 (2011): 151-168.

Mackay, J., G. A. Mensah, og K. Greenlund. The atlas of heart disease and stroke. World Health Organization, 2004.  
<http://www.google.com/books?hl=da&lr=&id=JagK-qIWaZoC&oi=fnd&pg=PA16&dq=The+atlas+of+heart+disease+and+stroke&ots=2kXYaRJSVr&sig=agrsc6DhqwBBSxoQcx97Fttht8>.

Maddison, R.a, Y.a Jiang, S.V.a Hoorn, C.N.a Mhurchu, D.b Exeter, og J.b Utter. «Perceived versus actual distance to local physical-activity facilities: Does it really matter?» Journal of Physical Activity and Health 7, nr. 3 (2010): 323-332.

Mafizur, R., H.A.S.M. Mahmood, og A. Rumana. «Noise pollution modeling of Dhaka city using GIS». Journal of Global Environment Engineering 16 (2011): 19-24.

Maheu-Giroux, M.a e, M.b Casapva, V.E.c Soto-Calle, L.B.d Ford, D.L.a Buckeridge, O.T.d Coomes, og T.W.a e Gyorkos. «Risk of malaria transmission from fish ponds in the Peruvian Amazon». Acta Tropica 115, nr. 1-2 (2010): 112-118.

Mak, S.a, B.b Klinkenberg, K.c Bartlett, og M.d Fyfe. «Ecological niche modeling of cryptococcus gattii in British Columbia, Canada». Environmental Health Perspectives 118, nr. 5 (2010): 653-658.

Malone, J.B., P. Nieto, og A. Tadesse. «Biology-based mapping of vector-borne parasites by geographic information systems and remote sensing». *Parassitologia* 48, nr. 1-2 (2006): 77-79.

Malone, J.B.a b. «Biology-based mapping of vector-borne parasites by Geographic Information Systems and Remote Sensing». *Parassitologia* 47, nr. 1 (2005): 27-50.

Malone, J.B.a, N.R.b Bergquist, O.K.c Huh, M.E.d Bavia, M.e Bernardi, M.M.f El Bahy, M.V.g Fuentes, et al. «A global network for the control of snail-borne disease using satellite surveillance and geographic information systems». *Acta Tropica* 79, nr. 1 (2001): 7-12.

Malone, J.B.a, J.M.b Yilma, J.C.a McCarroll, B.c Erko, S.d Mukaratirwa, og X.a Zhou. «Satellite climatology and the environmental risk of *Schistosoma mansoni* in Ethiopia and east Africa». *Acta Tropica* 79, nr. 1 (2001): 59-72.

Martins-Bedk, F.T.a, L.V.a Dutra, C.C.a Freitas, R.J.P.S.b c Guimaryes, R.S.d Amaral, S.C.e Drummond, og O.S.e Carvalho. «Schistosomiasis risk mapping in the state of Minas Gerais, Brazil, using a decision tree approach, remote sensing data and sociological indicators». *Memorias do Instituto Oswaldo Cruz* 105, nr. 4 (2010): 541-548.

Massey, P. «Reducing maternal mortality in Senegal: using GIS to identify priority regions for the expansion of human resources for health.» *World health & population* 13, nr. 2 (2011): 13-22.

Mathew, D. «Information technology and public health management of disasters—a model for South Asian countries.» *Prehospital and disaster medicine?: the official journal of the National Association of EMS Physicians and the World Association for Emergency and Disaster Medicine in association with the Acute Care Foundation* 20, nr. 1 (2005): 54-60.

Maynard, D.a, B.A.a Coull, A.a Gryparis, og J.b c Schwartz. «Mortality risk associated with short-term exposure to traffic particles and sulfates». *Environmental Health Perspectives* 115, nr. 5 (2007): 751-755.

McGrail, M. R., og J. S. Humphreys. «Measuring spatial accessibility to primary care in rural areas: improving the effectiveness of the two-step floating catchment area method». *Applied Geography* 29, nr. 4 (2009): 533-541.

McGregor, J., N. Hanlon, S. Emmons, D. Voaklander, og K. Kelly. «If all ambulances could fly: putting provincial standards of emergency care access to the test in Northern British Columbia.» *Canadian journal of rural medicine?: the official journal of the Society of Rural Physicians of Canada = Journal canadien de la medecine rurale?: le journal officiel de la Societe de medecine rurale du Canada* 10, nr. 3 (2005): 163-168.

McGuire, S.a, E.b Kruger, og M.b Tennant. «Travel patterns for government emergency dental care in Australia: A new approach using GIS tools». *Australian Dental Journal* 56, nr. 4 (2011): 389-393.

McGwire, K.a, E.L.b Segura, M.c Scavuzzo, A.A.d Gomez, og M.c Lamfri. «Spatial pattern of reinfestation by *Triatoma infestans* in Chancay, Argentina». *Journal of Vector Ecology* 31, nr. 1 (2006): 17-28.

McLafferty, S.a c, og S.b Grady. «Immigration and geographic access to prenatal clinics in Brooklyn, NY: A geographic information systems analysis». *American Journal of Public Health* 95, nr. 4 (2005): 638-640.

McLafferty, S.a, og S.b Grady. «Prenatal care need and access: A GIS analysis». *Journal of Medical Systems* 28, nr. 3 (2004): 321-333.

McLafferty, S.L. «GIS and health care». *Annual Review of Public Health* 24 (2003): 25-42.

Meade, M., og M. Emch. *Medical geography*. Guilford Press, 2010.  
[http://www.google.com/books?hl=da&lr=&id=mh8uMs742c8C&oi=fnd&pg=PP2&dq=Medical+geography&ots=kRmi\\_13\\_vw&sig=wqhgphn\\_CHpoedZv-qyaRHXUJ5M](http://www.google.com/books?hl=da&lr=&id=mh8uMs742c8C&oi=fnd&pg=PP2&dq=Medical+geography&ots=kRmi_13_vw&sig=wqhgphn_CHpoedZv-qyaRHXUJ5M).

Meankaew, P.a, J.a b Kaewkungwal, A.a Khamsiriwatchara, P.a Khunthong, P.b Singhasivanon, og W.c Satimai. «Application of mobile-technology for disease and treatment monitoring of malaria in the 'Better Border Healthcare Programme'». *Malaria Journal* 9, nr. 1 (2010).  
<http://www.scopus.com/inward/record.url?eid=2-s2.0-77955703149&partnerID=40&md5=9392c8d9577e8b087a97a20ac9181892>.

Merbitz, H., M. Buttstdt, S. Michael, W. Dott, og C. Schneider. «GIS-based identification of spatial variables enhancing heat and poor air quality in urban areas». *Applied Geography* 33 (2012): 94-106.

Metzler, M., N. Kanarek, K. Highsmith, R. Straw, R. Bialek, J. Stanley, I. Auston, og R. Klein. «Community health status indicators project: the development of a national approach to community health.» *Preventing chronic disease* 5, nr. 3 (2008): A94.

Meusel, D., J. R. Ruiz, F. B. Ortega, M. Hgstrmer, P. Bergman, og M. Sjøstrm. «Assessing levels of physical activity in the European population-the ALPHA project». *Seleccion* 16, nr. 1 (2007): 9-12.

Miller, C. «The introduction and expansion of GIS into a small local health department drinking-water program». *Journal of Environmental Health* 69, nr. 6 (2007): 35-40.

Mills, J.W., og A. Curtis. «Geospatial approaches for disease risk communication in marginalized communities.» *Progress in community health partnerships?: research, education, and action* 2, nr. 1 (2008): 61-72.

Miner, J. W., A. White, S. Palmer, og A. E. Lubenow. «Geocoding and social marketing in Alabama's cancer prevention programs». *Preventing chronic disease* 2, nr. Special Issue (2005).  
<http://www.ncbi.nlm.nih.gov/pmc/articles/PMC1459470/>.

Miner, J.W., A. White, A.E. Lubenow, og S. Palmer. «Geocoding and social marketing in Alabama's cancer prevention programs.» *Preventing chronic disease [electronic resource]*. 2 Spec no (2005): A17.

Miranda, M. L., D. C. Dolinoy, og M. A. Overstreet. «Mapping for prevention: GIS models for directing childhood lead poisoning prevention programs.» *Environmental health perspectives* 110, nr. 9 (2002): 947.

Miranda, M.L.a i, J.M.a Silva, M.A.O.a Galeano, J.P.b Brown, D.S.c Campbell, E.d Coley, C.S.d Cowan, et al. «Building geographic information system capacity in local health departments: Lessons from a North Carolina Project». *American Journal of Public Health* 95, nr. 12 (2005): 2180-2185.

Mirghani, S.E.a, B.Y.M.a Nour, S.M.a Bushra, I.M.b c Elhassan, R.W.d e Snow, og A.M.d e Noor. «The spatial-temporal clustering of Plasmodium falciparum infection over eleven years in Gezira State, the Sudan». *Malaria Journal* 9, nr. 1 (2010). <http://www.scopus.com/inward/record.url?eid=2-s2.0-77953625090&partnerID=40&md5=21889d55d2497c5262d17a6c07f0baa2>.

Mitchell, R.a, D.b Dorling, og M.c Shaw. «Population production and modelling mortality - An application of geographic information systems in health inequalities research». *Health and Place* 8, nr. 1 (2002): 15-24.

Mohammed, Z., H. Mostafa, og N. Chakib. «An oriented service architecture and model for GIS health management: Case of cancer in Morocco». I 2011 Colloquium in Information Science and Technology, CIST 2011, 6, 2011.  
<http://www.scopus.com/inward/record.url?eid=2-s2.0-84857816980&partnerID=40&md5=67ffdd58b7d145de3bc8fe3f11029f7e>.

Moosi, J.C.a, D.a James Nokes, H.a Gatakaa, T.N.a Williams, E.a Bauni, O.S.b Levineb, og J.A.G.a Scotta. «Sensitivity of hospital-based surveillance for severe disease: A geographic information system analysis of access to care in Kilifi district, Kenya [Sensibilit de la surveillance hospitalire des maladies graves: Une analyse du systme d'information géographique de l'accs aux soins dans le district Kilifi au Kenya]». *Bulletin of the World Health Organization* 89, nr. 2 (2011): 102-111.

Moncayo, A.C.a b, J.D.a Edman, og J.T.a c Finn. «Application of Geographic Information Technology in Determining Risk of Eastern Equine Encephalomyelitis Virus Transmission». *Journal of the American Mosquito Control Association* 16, nr. 1 (2000): 28-35.

Mondini, A.a, og F.b c Chiaravalloti Neto. «Socioeconomic variables and dengue transmission». *Revista de Saude Publica* 41, nr. 6 (2007): 923-930.

Moodley, I.a, I.b Kleinschmidt, B.a Sharp, M.a Craig, og C.c Appleton. «Temperature-suitability maps for schistosomiasis in South Africa». *Annals of Tropical Medicine and Parasitology* 97, nr. 6 (2003): 617-627.

Moore, S., og Y. Kestens. «Neighbourhood Environmental Correlates of Perceived Park Proximity in Montreal». *Canadian Journal of Public Health* 102, nr. 3 (2011): 176-79.

Morain, S.A., og A.M. Budge. «Environmental sensing and human health». I *Advances in Photogrammetry, Remote Sensing and Spatial Information Sciences: 2008 ISPRS Congress Book*, 397-411, 2008. <http://www.scopus.com/inward/record.url?eid=2-s2.0-79952356389&partnerID=40&md5=202a2111f701a2d3a1c40d4bc35969dd>.

Moreno-Sanchez, R.a, M.b Hayden, C.c Janes, og G.d Anderson. «A web-based multimedia spatial information system to document *Aedes aegypti* breeding sites and dengue fever risk along the US-Mexico border». *Health and Place* 12, nr. 4 (2006): 715-727.

Morgenstern, V.b, A.b d Zutavern, J.b e Cyrus, I.f g Brockow, U.b Gehring, S.f g Koletzko, C.P.f g Bauer, D.d Reinhardt, H.-E.b c Wichmann, og J.a b Heinrich. «Respiratory health and individual estimated exposure to traffic-related air pollutants in a cohort of young children». *Occupational and Environmental Medicine* 64, nr. 1 (2007): 8-16.

Moron, M.J., A. Gomez-Jaime, J.R. Luque, og E. Casilari. «Development and evaluation of a Python telecare system based on a Bluetooth Body Area Network». *Eurasip Journal on Wireless Communications and Networking* 2011 (2011). <http://www.scopus.com/inward/record.url?eid=2-s2.0-79953284957&partnerID=40&md5=575f7055ab7fe12c394eade24d8005a>.

Moron, M.J.a, A.a Gomez-Jaime, J.R.a Luque, E.a Casilari, og J.A.b Gazquez. «Analysis of a telemonitoring system based on a bluetooth body area network using smartphones». I *Recent Researches in Applied Informatics - Proceedings of the 2nd International Conference on Applied Informatics and Computing Theory, AICT'11*, 17-22, 2011. <http://www.scopus.com/inward/record.url?eid=2-s2.0-81755169079&partnerID=40&md5=d47f2b17ee08f8cad36b62d272378f34>.

Morra, P.a, S.b Bagli, og G.a Spadoni. «The analysis of human health risk with a detailed procedure operating in a GIS environment». *Environment International* 32, nr. 4 (2006): 444-454.

Morra, P.a, G.a Spadoni, R.b Lisi, og G.c Maschio. «The application of the EHHRA-GIS tool for the assessment of human health risk in the Pace valley of Messina». I *Proceedings of the European Safety and Reliability Conference 2006, ESREL 2006 - Safety and Reliability for Managing Risk*, 3:2239-2245, 2006. <http://www.scopus.com/inward/record.url?eid=2-s2.0-56249109440&partnerID=40&md5=310eec924dccbcd5d75d1621a0b2771>.

Moudon, A.V.a h, C.b Lee, A.D.c Cheadle, C.d Garvin, D.B.e Johnson, T.L.f Schmid, og R.D.g Weathers. «Attributes of environments supporting walking». *American Journal of Health Promotion* 21, nr. 5 (2007): 448-459.

Muhajarine, N.a, L.b Vu, og R.c Labonte. «Social contexts and children's health outcomes: Researching across the boundaries». *Critical Public Health* 16, nr. 3 (2006): 205-218.

Mujeeb, S.A.a, S.b Shahab, og A.A.c Hyder. «Geographical display of health information: Study of hepatitis C infection in Karachi, Pakistan». *Public Health* 114, nr. 5 (2000): 413-415.

Mullner, R.M.a, K.b Chung, K.G.a Croke, og E.K.a Mensah. «Geographic information systems in public health and medicine». *Journal of Medical Systems* 28, nr. 3 (2004): 215-221.

Murad, A.A. «Creating a geographical information systems-based spatial profile for exploring health services supply and demand». *American Journal of Applied Sciences* 8, nr. 6 (2011): 644-651.

—. «Creating a GIS application for health services at Jeddah city». *Computers in Biology and Medicine* 37, nr. 6 (2007): 879-889.

—. «Creating a GIS-based epidemiological application for Jeddah city». *International Journal of Healthcare Technology and Management* 9, nr. 5-6 (2008): 540-551.

Murad, A.A.a b. «Creating a GIS application for local health care planning in Saudi Arabia». *International Journal of Environmental Health Research* 14, nr. 3 (2004): 185-199.

Murphy, E., E. A. King, og H. J. Rice. «Estimating human exposure to transport noise in central Dublin, Ireland». *Environment international* 35, nr. 2 (2009): 298-302.

Murphy, E.a, E.A.b King, og H.J.b Rice. «Estimating human exposure to transport noise in central Dublin, Ireland». *Environment International* 35, nr. 2 (2009): 298-302.

Murphy, T.E.a, M.E.a b Tinetti, og H.G.a Allore. «Hierarchical models to evaluate translational research: Connecticut collaboration for fall prevention». *Contemporary Clinical Trials* 29, nr. 3 (2008): 343-350.

Murray, E. J., B. J. Marais, G. Mans, N. Beyers, H. Ayles, P. Godfrey-Faussett, S. Wallman, og V. Bond. «A multidisciplinary method to map potential tuberculosis transmission hot spots in high-burden communities». *The International Journal of Tuberculosis and Lung Disease* 13, nr. 6 (2009): 767-774.

Murray, E.J.a i, B.J.b Marais, G.c Mans, N.d Beyers, H.e f Ayles, P.e Godfrey-Faussett, S.g Wallman, og V.f h Bond. «A multidisciplinary method to map potential tuberculosis transmission 'hot spots' in high-burden communities». *International Journal of Tuberculosis and Lung Disease* 13, nr. 6 (2009): 767-774.

Myers, J.a b, M.a Bernstein, S.F.a Morin, og M.a Reyes. «Targeting HIV clinical training with maps: Lessons from the Pacific AIDS Education and Training Center». *Evaluation and the Health Professions* 30, nr. 4 (2007): 322-338.

Møller-Jensen, L., og R. Y. Kofie. «Exploiting available data sources: location/allocation modeling for health service planning in rural Ghana». *Geografisk Tidsskrift-Danish Journal of Geography* 101 (2012). <http://e-tidsskrifter.dk/ojs/index.php/geografisktidsskrift/article/view/2522/4481>.

Nadal, M.b, V.c d Kumar, M.b c Schuhmacher, og J.L.a b Domingo. «Applicability of a neuroprobabilistic integral risk index for the environmental management of polluted areas: A case study». *Risk Analysis* 28, nr. 2 (2008): 271-286.

Nair, S.a, E.A.b Richardson, W.R.E.a Thompson, N.K.b Shortt, og K.J.a Stewart. «The influence of geography on uptake of plastic surgery services - analysis based on bilateral breast reduction data». *Journal of Plastic, Reconstructive and Aesthetic Surgery* 63, nr. 4 (2010): 666-672.

Nakaya, T. «Health and place: A review of neighbourhood studies of geographical inequalities in health». *Japanese Journal of Human Geography* 63, nr. 4 (2011): 58-75.

Nakaya, T., K. Nakase, og K. Osaka. «Spatio-temporal modelling of the HIV epidemic in Japan based on the national HIV/AIDS surveillance». *Journal of geographical systems* 7, nr. 3 (2005): 313-336.

Nakazawa, Y.a c, R.a Williams, A.T.a Peterson, P.b Mead, E.b Staples, og K.L.b Gage. «Climate change effects on plague and tularemia in the United States». *Vector-Borne and Zoonotic Diseases* 7, nr. 4 (2007): 529-540.

Nangia, A.K.a, D.S.b c Likosky, og D.c Wang. «Access to assisted reproductive technology centers in the United States». *Fertility and Sterility* 93, nr. 3 (2010): 745-761.

—. «Distribution of male infertility specialists in relation to the male population and assisted reproductive technology centers in the United States». *Fertility and Sterility* 94, nr. 2 (2010): 599-609.

Nash, D.a b, B.a b Elul, M.a b Rabkin, M.a Tun, S.a Saito, M.c Becker, og H.a Nuwagaba-Biribonwoha. «Strategies for more effective monitoring and evaluation systems in HIV programmatic scale-up in resource-limited settings: Implications for health systems strengthening». *Journal of Acquired Immune Deficiency Syndromes* 52, nr. SUPPL. 1 (2009): S58-S62.

Neckerman, K.M.a e, G.S.b Lovasi, S.c Davies, M.a Purciel, J.a Quinn, E.a Feder, N.a Raghunath, B.a Wasserman, og A.d Rundle. «Disparities in urban neighborhood conditions: Evidence from GIS measures and field observation in New York city». *Journal of Public Health Policy* 30, nr. SUPPL. 1 (2009): S264-S285.

Neerinckx, S.a b, A.T.c Peterson, H.b Gulinck, J.b Deckers, D.d Kimaro, og H.a e Leirs. «Predicting Potential Risk Areas of Human Plague for the Western Usambara Mountains, Lushoto District, Tanzania». *American Journal of Tropical Medicine and Hygiene* 82, nr. 3 (2010): 492-500.

Nga, N.T.a b, M.b Malqvist, L.b Eriksson, D.P.c Hoa, A.d Johansson, L.b e Wallin, L.-A.b Persson, og U.f Ewald. «Perinatal services and outcomes in

Quang Ninh province, Vietnam». *Acta Paediatrica, International Journal of Paediatrics* 99, nr. 10 (2010): 1478-1483.

Ngamini Ngui, A.a b, og P.b Apparicio. «Potential accessibility to mental health services in Montreal: A geographical information system approach [L'accessibilit  potentielle aux services de sant  mentale   Montreal: Approche par les syst mes d'information g ographique]». *Revue d'Epidemiologie et de Sante Publique* 59, nr. 6 (2011): 369-378.

Ngom, R., og A. Siegmund. «Using Remote Sensing and GIS to integrate various environmental factors into a predictive malaria transmission risks model in rural Burkina Faso». I Proceedings of SPIE - The International Society for Optical Engineering. Bd. 6366, 2006.  
<http://www.scopus.com/inward/record.url?eid=2-s2.0-33751425190&partnerID=40&md5=59379073823d1c672f88ce21bfe4cd4a>.

Nieuwenhuijsen, M.a, D.b Paustenbach, og R.c Duarte-Davidson. «New developments in exposure assessment: The impact on the practice of health risk assessment and epidemiological studies». *Environment International* 32, nr. 8 (2006): 996-1009.

Nihei, N.a, N.b Kajihara, M.c Kirinoki, Y.c Chigusa, Y.d Saitoh, R.e Shimamura, H.e Kaneta, og H.c Matsuda. «Fixed-point observation of *Oncomelania nosophora* in Kofu Basin - Establishment of monitoring system of schistosomiasis japonica in Japan». *Parasitology International* 52, nr. 4 (2003): 395-401.

Nihei, N.c, Y.a Hashida, M.c Kobayashi, og A.b Ishii. «Analysis of malaria endemic areas on the Indochina Peninsula using remote sensing». *Japanese Journal of Infectious Diseases* 55, nr. 5 (2002): 160-166.

Noon, C., og C. Hankins. «Spatial data visualization in healthcare: Supporting a facility location decision via GIS-based market analysis». I Proceedings of the Hawaii International Conference on System Sciences, 149, 2001. <http://www.scopus.com/inward/record.url?eid=2-s2.0-0034970849&partnerID=40&md5=31dd77cc050ef3347d151fc310332256>.

Noor, A. M., V. A. Alegana, P. W. Gething, og R. W. Snow. «A spatial national health facility database for public health sector planning in Kenya in 2008». *International journal of health geographics* 8, nr. 1 (2009): 13.

Noor, A.M.a f, A.A.a Amin, P.W.b c Gething, P.M.c Atkinson, S.I.a d Hay, og R.W.a e Snow. «Modelling distances travelled to government health services in Kenya». *Tropical Medicine and International Health* 11, nr. 2 (2006): 188-196.

Noor, A.M.a f, D.a b d g Zurovac, S.I.a c h Hay, S.A.d i Ochola, og R.W.a e j Snow. «Defining equity in physical access to clinical services using geographical information systems as part of malaria planning and monitoring in Kenya». *Tropical Medicine and International Health* 8, nr. 10 (2003): 917-926.

Noor, A.M.a, P.W.a Gikandi, S.I.a b Hay, R.O.c Muga, og R.W.a d Snow. «Creating spatially defined databases for equitable health service planning in low-income countries: The example of Kenya». *Acta Tropica* 91, nr. 3 (2004): 239-251.

Nuvolone, D.a b, R.D.b Maggiore, S.c Maio, R.b Fresco, S.c Baldacci, L.c Carrozzi, F.c Pistelli, og G.c d Viegi. «Geographical information system and environmental epidemiology: A cross-sectional spatial analysis of the effects of traffic-related air pollution on population respiratory health». *Environmental Health: A Global Access Science Source* 10, nr. 1 (2011).  
<http://www.scopus.com/inward/record.url?eid=2-s2.0-79952091883&partnerID=40&md5=d5a0f09ff2d3d4eae1965ac311d96035>.

Nyberg, F., P. Gustavsson, L. J rup, T. Bellander, N. Berglind, R. Jakobsson, og G. Pershagen. «Urban air pollution and lung cancer in Stockholm». *Epidemiology* 11, nr. 5 (2000): 487-495.

Nykiforuk, C. I. J., og L. M. Flaman. «Geographic information systems (GIS) for health promotion and public health: a review». *Health Promotion Practice* 12, nr. 1 (2011): 63-73.

Nykiforuk, C.I., og L.M. Flaman. «Geographic information systems (GIS) for Health Promotion and Public Health: a review.» *Health promotion practice* 12, nr. 1 (2011): 63-73.



Ocapa-Riola, R. «Common errors in disease mapping». *Geospatial Health* 4, nr. 2 (2010): 139-154.

Odiit, M.a, P.R.b Bessell, E.M.b Føvre, T.c Robinson, J.d Kinoti, P.G.e Coleman, S.C.b Welburn, J.d McDermott, og M.E.J.b Woolhouse. «Using remote sensing and geographic information systems to identify villages at high risk for rhodesiense sleeping sickness in Uganda». *Transactions of the Royal Society of Tropical Medicine and Hygiene* 100, nr. 4 (2006): 354-362.

Ogden, N.H.a b, L.c St.-Onge, I.K.d Barker, S.c Brazeau, M.b Bigras-Poulin, D.F.e Charron, C.M.f Francis, et al. «Risk maps for range expansion of the Lyme disease vector, *Ixodes scapularis*, in Canada now and with climate change». *International Journal of Health Geographics* 7 (2008).  
<http://www.scopus.com/inward/record.url?eid=2-s2.0-44949095446&partnerID=40&md5=bdc2be6445b2b9c615e56449f743f8ee>.

Oliveira, A., og P. Cabral. «Development of a web-available epidemiological surveillance system integrating geographic information?: The public health emergencies support system at the portuguese general directorate for health». *I WEBIST 2009 - Proceedings of the 5th International Conference on Web Information Systems and Technologies*, 238-243, 2009.  
<http://www.scopus.com/inward/record.url?eid=2-s2.0-67650545474&partnerID=40&md5=529daf2133d4b7e453f934549031af30>.

Olivet, M.a, J.a Aloy, E.b Prat, og X.b c Pons. «Health services provision and geographic accessibility [Oferta de servicios de salud y accesibilidad geográfica]». *Medicina Clinica* 131, nr. SUPPL. 4 (2008): 16-22.

Olson, K.L.a b c e, S.J.d Grannis, og K.D.a b c Mandl. «Privacy protection versus cluster detection in spatial epidemiology». *American Journal of Public Health* 96, nr. 11 (2006): 2002-2008.

Ombok, M., K. Adazu, F. Odhiambo, N. Bayoh, R. Kiriinya, L. Slutsker, M. J. Hamel, et al. «Geospatial distribution and determinants of child mortality in rural western Kenya 2002-2005». *Tropical Medicine & International Health* 15, nr. 4 (2010): 423-433.

Ombok, M.a, K.a b Adazu, F.a Odhiambo, N.a Bayoh, R.a Kiriinya, L.a c Slutsker, M.J.a c Hamel, et al. «Geospatial distribution and determinants of child mortality in rural western Kenya 2002-2005». *Tropical Medicine and International Health* 15, nr. 4 (2010): 423-433.

Ong, M. E. H., E. H. Tan, X. Yan, P. Anushia, S. H. Lim, B. S. H. Leong, V. Y. K. Ong, et al. «An observational study describing the geographic-time distribution of cardiac arrests in Singapore: what is the utility of geographic information systems for planning public access defibrillation?(PADS Phase I)». *Resuscitation* 76, nr. 3 (2008): 388-396.

Ong, M.E.H.a, E.H.b Tan, X.c Yan, P.c Anushia, S.H.a Lim, B.S.-H.d Leong, V.Y.K.e Ong, et al. «An observational study describing the geographic-time distribution of cardiac arrests in Singapore: What is the utility of geographic information systems for planning public access defibrillation? (PADS Phase I)». *Resuscitation* 76, nr. 3 (2008): 388-396.

Onwujekwe, O.a b, K.c Hanson, B.a b d Uzochukwu, O.b Ezeoke, S.b Eze, og N.e Dike. «Geographic inequities in provision and utilization of malaria treatment services in southeast Nigeria: Diagnosis, providers and drugs». *Health Policy* 94, nr. 2 (2010): 144-149.

Opisa, S.a b, M.R.a Odiere, W.G.Z.O.b Jura, D.M.S.a Karanja, og P.N.M.a Mwinzi. «Malacological survey and geographical distribution of vector snails for schistosomiasis within informal settlements of Kisumu City, western Kenya». *Parasites and Vectors* 4, nr. 1 (2011).  
<http://www.scopus.com/inward/record.url?eid=2-s2.0-82755195784&partnerID=40&md5=e6fe0c8a68949d50959ca017186ef630>.

Oreskovic, N.M.a, J.P.b Winickoff, K.A.c Kuhlthau, D.c Romm, og J.M.b Perrin. «Obesity and the built environment among massachusetts children». *Clinical Pediatrics* 48, nr. 9 (2009): 904-912.

Osei, F.B., og A.A. Duker. «Spatial and demographic patterns of Cholera in Ashanti region - Ghana». *International Journal of Health Geographics* 7 (2008). <http://www.scopus.com/inward/record.url?eid=2-s2.0-51949118949&partnerID=40&md5=7a95948db5321bc3a0fdce0b51f44691>.

Oudinet, J.-P.a, J.a Meline, W.b Che?micki, M.c Sanak, D.-W.d Magdalena, J.-P.e Besancenot, S.a Wicherek, et al. «Towards a multidisciplinary and

integrated strategy in the assessment of adverse health effects related to air pollution: The case study of Cracow (Poland) and asthma». *Environmental Pollution* 143, nr. 2 (2006): 278-284.

Owen, K.K.a, E.J.b Obregon, og K.H.b Jacobsen. «A geographic analysis of access to health services in rural Guatemala». *International Health* 2, nr. 2 (2010): 143-149.

Owusu-Edusei Jr., K., og C.J. Owens. «Monitoring county-level chlamydia incidence in Texas, 2004-2005: Application of empirical Bayesian smoothing and Exploratory Spatial Data Analysis (ESDA) methods». *International Journal of Health Geographics* 8, nr. 1 (2009).  
<http://www.scopus.com/inward/record.url?eid=2-s2.0-62549159166&partnerID=40&md5=9b6978fc6282684a1b9116abd22530bb>.

Oyana, T. J., og F. M. Margai. «Geographic analysis of health risks of pediatric lead exposure: A golden opportunity to promote healthy neighborhoods». *Archives of Environmental and Occupational Health* 62, nr. 2 (2007): 93-104.

Oyana, T.J.a b, P.a Rogerson, og J.S.b c Lwebuga-Mukasa. «Geographic clustering of adult asthma hospitalization and residential exposure to pollution at a United States-Canada border crossing». *American Journal of Public Health* 94, nr. 7 (2004): 1250-1257.

Oyana, T.J.a b d, og F.M.c Margai. «Geographic analysis of health risks of pediatric lead exposure: A golden opportunity to promote healthy neighborhoods». *Archives of Environmental and Occupational Health* 62, nr. 2 (2007): 93-104.

Palladino, C.a b c, J.M.a Bellon, S.d Perez-Hoyos, R.a Resino, S.e Guillin, D.a Garcia, M.D.f Gurbindo, et al. «Spatial pattern of HIV-1 mother-to-child-transmission in Madrid (Spain) from 1980 till now: Demographic and socioeconomic factors». *AIDS* 22, nr. 16 (2008): 2199-2205.

Paolino, L., M. Sebillo, og G. Cringoli. «Geographical Information Systems and on-line GIServices for health data sharing and management». *Parassitologia* 47, nr. 1 (2005): 171-175.

Parra, D.C.a, L.F.b c Gomez, N.L.d Fleischer, og J.e f David Pinzon. «Built environment characteristics and perceived active park use among older adults: Results from a multilevel study in Bogota». *Health and Place* 16, nr. 6 (2010): 1174-1181.

Parrott, R.a, J.E.b Volkman, E.c Lengerich, C.B.a Ghetian, A.E.a Chadwick, og S.a Hopfer. «Using geographic information systems to promote community involvement in comprehensive cancer control». *Health Communication* 25, nr. 3 (2010): 276-285.

Paul, S.K.a, A.a Jeyaram, K.b Kishore, A.b Ranjan, A.b Palit, S.b Kesari, og V.c Jayaraman. «Application of remote sensing and GIS in identifying and mapping sandfly distribution in endemic and non-endemic Kala-azar foci in Bihar and Jharkhand». I AIAA 57th International Astronautical Congress, IAC 2006, 4:2372-2387, 2006. <http://www.scopus.com/inward/record.url?eid=2-s2.0-40549092378&partnerID=40&md5=f104e8444bf4f2ae76c49e12aed86952>.

Paul, S.K.a, S.b Kesari, A.a Jeyaram, K.b Kishore, A.b Ranjan, A.b Palit, og V.c Jayaraman. «EO-based study on sandfly vector (Kala Azar Disease) in endemic and non-endemic area in Bihar and Jharkhand, India». I International Astronautical Federation - 58th International Astronautical Congress 2007, 4:2313-2328, 2007.  
<http://www.scopus.com/inward/record.url?eid=2-s2.0-54949092802&partnerID=40&md5=c40eb248740395b40cd8c2f1d765c2db>.

Pearce, J.a b, K.c Witten, og P.b Bartie. «Neighbourhoods and health: A GIS approach to measuring community resource accessibility». *Journal of Epidemiology and Community Health* 60, nr. 5 (2006): 389-395.

Pearce, J.a, R.a Hiscock, T.b Blakely, og K.c Witten. «A national study of the association between neighbourhood access to fast-food outlets and the diet and weight of local residents». *Health and Place* 15, nr. 1 (2009): 193-197.

Pearce, J.a, K.b Witten, R.a Hiscock, og T.c Blakely. «Are socially disadvantaged neighbourhoods deprived of health-related community resources?» *International Journal of Epidemiology* 36, nr. 2 (2007): 348-355.

—. «Regional and urban-rural variations in the association of neighbourhood deprivation with community resource access: A national study». *Environment and Planning A* 40, nr. 10 (2008): 2469-2489.

Pedigo, A.S., og A. Odoi. «Investigation of disparities in geographic accessibility to emergency stroke and myocardial infarction care in East Tennessee using geographic information systems and network analysis». *Annals of Epidemiology* 20, nr. 12 (2010): 924-930.

Peiter, P.C.a b. «Living conditions, health status and health services availability along the Brazilian border: A geographical approach [Condiciones de vida, situación de la salud y disponibilidad de servicios de salud en la frontera de Brasil: Un enfoque geografico]». *Cadernos de Saude Publica* 23, nr. SUPPL.2 (2007): S237-S250.

Peleg, K.a c d, og J.S.b c Pliskin. «A geographic information system simulation model of EMS: Reducing ambulance response time». *American Journal of Emergency Medicine* 22, nr. 3 (2004): 164-170.

Peng, Z.-H.a, Y.-J.a Cheng, K.H.b c Reilly, L.b Wang, Q.-Q.b Qin, Z.-W.b Ding, G.-W.b Ding, et al. «Spatial distribution of HIV/AIDS in Yunnan province, People's Republic of China». *Geospatial Health* 5, nr. 2 (2011): 177-182.

Pereira, S.M.a b, G.M.B.a Ambrosano, K.L.a Cortellazzi, E.P.S.a Tagliaferro, C.A.c Vettorazzi, S.F.B.c Ferraz, M.C.a Meneghim, og A.C.a Pereira. «Geographic information systems (GIS) in assessing dental health». *International Journal of Environmental Research and Public Health* 7, nr. 5 (2010): 2423-2436.

Perez, L., og S. Dragicevic. «An agent-based approach for modeling dynamics of contagious disease spread». *International Journal of Health Geographics* 8, nr. 1 (2009). <http://www.scopus.com/inward/record.url?eid=2-s2.0-69249200623&partnerID=40&md5=0af4156ec4cb30fbf08a3c813fe06c8b>.

Petch, R.O., og R.R. Henson. «Child road safety in the urban environment». *Journal of Transport Geography* 8, nr. 3 (2000): 197-211.

Pierce, S.J.a b, R.L.a Miller, M.M.a Morales, og J.a Forney. «Identifying HIV prevention service needs of African American men who have sex with men: An application of spatial analysis techniques to service planning». *Journal of Public Health Management and Practice* 13, nr. SUPPL. (2007): S72-S79.

Pinkerton, R.C.a, R.B.b Oriá, J.W.c Kent Jr., A.a Kohli, C.b Abreu, O.a Bushen, A.A.M.a b Lima, J.c Blangero, S.c Williams-Blangero, og R.L.a b Guerrant. «Short report: Evidence for genetic susceptibility to developing early childhood diarrhea among Shantytown children living in Northeastern Brazil». *American Journal of Tropical Medicine and Hygiene* 85, nr. 5 (2011): 893-896.

Pinzon, J.E.a b d, J.M.c Wilson, og C.J.b Tucker. «Climate-based health monitoring systems for eco-climatic conditions associated with infectious diseases». *Bulletin de la Societe de Pathologie Exotique* 98, nr. 3 (2005): 239-243.

Pleydell, D.R.J.a, A.a Graham, P.M.a Danson, P.S.a Craig, F.b Raoul, F.b Tourneux, og P.b Giraudoux. «Mapping HAE Disease Risk Using Remotely Sensed Data». I *International Geoscience and Remote Sensing Symposium (IGARSS)*, 5:3362-3364, 2003. <http://www.scopus.com/inward/record.url?eid=2-s2.0-0242625809&partnerID=40&md5=37eac4eae610712ec66756e2adc255fb>.

Poggio, L.a, og B.b Vrš?aj. «A GIS-based human health risk assessment for urban green space planning-An example from Grugliasco (Italy)». *Science of the Total Environment* 407, nr. 23 (2009): 5961-5970.

Polack, S., S. Brooker, H. Kuper, S. Mariotti, D. Mabey, og A. Foster. «Mapping the global distribution of trachoma». *Bulletin of the World Health Organization* 83, nr. 12 (2005): 913-919.

Polack, S.a, S.b Brooker, H.b Kuper, S.c Mariotti, D.b Mabey, og A.b Foster. «Mapping the global distribution of trachoma». *Bulletin of the World Health Organization* 83, nr. 12 (2005): 913-919.

Polack, S.R.a, A.W.a Solomon, N.D.E.a Alexander, P.A.b Massae, S.b Safari, J.F.c Shao, A.a Foster, og D.C.a Mabey. «The household distribution of trachoma in a Tanzanian village: An application of GIS to the study of trachoma». *Transactions of the Royal Society of Tropical Medicine and Hygiene* 99, nr. 3 (2005): 218-225.

Poonsuph, R. «A value added model for GIS call center in emergency rescue service». I 2011 IEEE 3rd International Conference on Communication Software and Networks, ICCSN 2011, 32-36, 2011.  
<http://www.scopus.com/inward/record.url?eid=2-s2.0-80053161030&partnerID=40&md5=010109dcd452e778bb32862b22ce0770>.

Popick, R., A. Frazzano, og R. Trachtenberg. «Geographic access to care in Rhode Island through the use of GIS.» *Medicine and health, Rhode Island* 92, nr. 7 (2009): 256-259.

Porell, F.W.a, K.b Liu, og D.P.c Brungo. «Agency and market area factors affecting home health agency supply changes». *Health Services Research* 41, nr. 5 (2006): 1847-1875.

Pradhan, M.R. «Health resources and Internet with reference to HealthNet Nepal.» *Kathmandu University medical journal (KUMJ)*. 1, nr. 4 (2003): 297-304.

Pradubwong, S., O. Lekbunyasins, V. Chantachum, S. Udomtanasup, K. Simmalee, og B. Chowchuen. «Application of Geographic Information System (GIS) for management of cleft lip-palate care at the Tawanchai Cleft Center.» *Journal of the Medical Association of Thailand = Chotmaihet thangphaet* 93 Suppl 4 (2010): S58-62.

Prince, A.a, X.a Chen, og K.C.a b Lun. «Containing acute disease outbreak». *Methods of Information in Medicine* 44, nr. 5 (2005): 603-608.

Prociow, P. A., og J. A. Crowe. «Towards personalised ambient monitoring of mental health via mobile technologies». *Technology and Health Care* 18, nr. 4 (2010): 275-284.

Proctor, S.P.a, S.b Gopal, A.b Imai, J.c Wolfe, D.a Ozonoff, og R.F.a White. «Spatial analysis of 1991 Gulf War troop locations in relationship with postwar health symptom reports using GIS techniques». *Transactions in GIS* 9, nr. 3 (2005): 381-396.

Puett, R. C., J. E. Hart, J. D. Yanosky, C. Paciorek, J. Schwartz, H. Suh, F. E. Speizer, og F. Laden. «Chronic fine and coarse particulate exposure, mortality, and coronary heart disease in the Nurses' Health Study». *Environmental Health Perspectives* 117, nr. 11 (2009): 1702.

Querriau, X.a, M.b Kissiyar, D.a c Peeters, og I.a c d Thomas. «Optimal location of healthcare facilities in developing countries: An example in Rwanda [Localisation optimale d'unités de soins dans un pays en voie de développement: Analyse de sensibilité]». *CyberGeo 2004* (2004).  
<http://www.scopus.com/inward/record.url?eid=2-s2.0-55449126875&partnerID=40&md5=ee5964d80a39e9ef5564b34ce4ab5c1d>.

Quesnel, A.a, J.b Soula, K.a Wyndels, og R.a b Beuscart. «POLESAT: e-Atlas of Health, Planning and Sustainable Development [POLESAT?: e-Atlas de santé, planification et développement durable]». *IRBM* 30, nr. 4 (2009): 201-204.

Quigg, R.a, A.b Gray, A.I.a Reeder, A.c Holt, og D.L.b Waters. «Using accelerometers and GPS units to identify the proportion of daily physical activity located in parks with playgrounds in New Zealand children». *Preventive Medicine* 50, nr. 5-6 (2010): 235-240.

Quindos Poncela, L. S., P. L. Fernandez, J. Gomez Arozamena, C. Sainz, J. A. Fernandez, E. Suarez Mahou, J. L. Martin Matarranz, og M. C. Cascon. «Natural gamma radiation map (MARNA) and indoor radon levels in Spain». *Environment international* 29, nr. 8 (2004): 1091-1096.

Rafalski, E.a, og L.b Zun. «Using GIS to monitor emergency room use in a large urban hospital in Chicago». *Journal of Medical Systems* 28, nr. 3 (2004): 311-319.

Rahman, S., og D. K. Smith. «Use of location-allocation models in health service development planning in developing nations». *European Journal of Operational Research* 123, nr. 3 (2000): 437-452.

Rahman, S.a b f, J.H.b Price, M.d Dignan, S.e Rahman, P.S.c Lindquist, og T.R.b Jordan. «Access to mammography facilities and detection of breast cancer by screening mammography: A GIS approach». *International Journal of Cancer Prevention* 2, nr. 6 (2009): 403-413.

Rainham, D.a, D.a Krewski, I.b McDowell, M.c Sawada, og B.d Liekens. «Development of a wearable global positioning system for place and health research». *International Journal of Health Geographics* 7 (2008).

<http://www.scopus.com/inward/record.url?eid=2-s2.0-58149345739&partnerID=40&md5=44b89aae5416786544d915bd8e4a64a4>.

Rainham, D.G.C. «Ecological complexity and West Nile Virus: Perspective on improving public health response». *Canadian Journal of Public Health* 96, nr. 1 (2005): 37-40.

Rajasekaran, S.a, L.b Jeyaseelan, K.a Raja, og N.a Ravichandran. «Demographic & clinical profile of HIV infected children accessing care at Tambaram, Chennai, India». *Indian Journal of Medical Research* 129, nr. 1 (2009): 42-49.

Rakotomanana, F., I. Jeanne, J.B. Duchemin, V. Pietra, L. Raharimalala, M.L. Tombo, og F. Arieu. «Geographic approach in malaria control in the central highlands of Madagascar [Approche géographique dans la lutte contre le paludisme dans la région des Hautes Terres Centrales ÷ Madagascar.]». *Archives de l'Institut Pasteur de Madagascar* 67, nr. 1-2 (2001): 27-30.

Ramaprasad, A.a, S.b c Gupta, S.R.b Papagari Sangareddy, A.a Prakash, og R.b d Venkatasubramanian. «Bridging the digital divide in e-health applications: Leading the way to an informed patient». *International Journal of Healthcare Technology and Management* 8, nr. 1-2 (2007): 120-140.

Ramirez-Sierra, M.J.a, M.a Herrera-Aguilar, S.b Gourbière, og E.a c Dumonteil. «Patterns of house infestation dynamics by non-domiciliated *Triatoma dimidiata* reveal a spatial gradient of infestation in rural villages and potential insect manipulation by *Trypanosoma cruzi*». *Tropical Medicine and International Health* 15, nr. 1 (2010): 77-86.

Randremanana, R.V., R. Migliani, S. Rakotomanga, og I. Jeanne. «Geographic Information Systems and health: application to Antananarivo city [Système d'Information Géographique et Santé: application ÷ la ville d'Antananarivo.]». *Archives de l'Institut Pasteur de Madagascar* 67, nr. 1-2 (2001): 74-78.

Regis, L.a, W.V.b Souza, A.F.a Furtado, C.D.c Fonseca, J.C.b Silveira Jr., P.J.d Ribeiro Jr., M.A.V.a Melo-Santos, M.S.e Carvalho, og A.M.V.f Monteiro. «An entomological surveillance system based on open spatial information for participative dengue control». *Anais da Academia Brasileira de Ciências* 81, nr. 4 (2009): 655-662.

Reif, J. S., J. B. Burch, J. R. Nuckols, L. Metzger, D. Ellington, W. K. Anger, og others. «Neurobehavioral effects of exposure to trichloroethylene through a municipal water supply.» *Environmental research* 93, nr. 3 (2003): 248.

Reissman, D. B., F. Staley, G. B. Curtis, og R. B. Kaufmann. «Use of geographic information system technology to aid Health Department decision making about childhood lead poisoning prevention activities.» *Environmental Health Perspectives* 109, nr. 1 (2001): 89.

Renger, R., A. Cimetta, S. Pettygrove, og S. Rogan. «Geographic information systems (GIS) as an evaluation tool». *American Journal of Evaluation* 23, nr. 4 (2002): 469-479.

Reveriego, G., J. Tellez, C. Urdiales, og F. Sandoval. «Sensecare: Real-time location-based health monitoring system». I *BIODEVICES 2011 - Proceedings of the International Conference on Biomedical Electronics and Devices*, 374-377, 2011. <http://www.scopus.com/inward/record.url?eid=2-s2.0-79960157265&partnerID=40&md5=404b818f41d7fd780657335f89b1339a>.

Ricketts, T.C. «Geographic information systems and public health». *Annual Review of Public Health* 24 (2003): 1-6.

Riner, M.E.a d, C.b Cunningham, og A.c Johnson. «Public Health Education and Practice Using Geographic Information System Technology». *Public Health Nursing* 21, nr. 1 (2004): 57-65.

Rinner, C., D. Patychuk, K. Bassil, S. Nasr, S. Gower, og M. Campbell. «The role of maps in neighborhood-level heat vulnerability assessment for the City of Toronto». *Cartography and Geographic Information Science* 37, nr. 1 (2010): 31-44.

Rivas, A.L.a b, G.c d Chowell, S.J.b Schwager, F.O.e f Fasina, A.L.g Hoogesteijn, S.D.b Smith, S.P.R.f Bisschop, K.L.a Anderson, og J.M.h Hyman. «Lessons from Nigeria: The role of roads in the geo-temporal progression of avian influenza (H5N1) virus». *Epidemiology and Infection* 138, nr. 2 (2010): 192-198.

Roberts, J. R., T. C. Hulsey, G. B. Curtis, og J. R. Reigart. «Using geographic information systems to assess risk for elevated blood lead levels in children.» *Public health reports* 118, nr. 3 (2003): 221.

Rochon, H.S., A. Randall, D. Brekken, og M. Parsons. «Combination of laboratory research and remote sensing applications toward mitigation of trypanosomiasis in Africa». I *International Geoscience and Remote Sensing Symposium (IGARSS)*, 5:2883-2886, 2002.  
<http://www.scopus.com/inward/record.url?eid=2-s2.0-0036031317&partnerID=40&md5=0e8424a9721cc1c98a39522bdd1c5f7f>.

Rodgers, S.E., og T.N. Mather. «Evaluating satellite sensor-derived indices for lyme disease risk prediction». *Journal of Medical Entomology* 43, nr. 2 (2006): 337-343.

Rodrigues Jr., A.L.a, A.a Ruffino-Netto, og E.A.b de Castilho. «Spatial distribution of M. tuberculosis-HIV coinfection in So Paulo State, Brazil, 1991-2001 [Distribuio espacial da coinfeio M. tuberculosis/HIV no Estado de So Paulo, 1991-2001]». *Revista de Saude Publica* 40, nr. 2 (2006): 265-270.

Rodriguez, S.F., I.M. Navas, M.D. Esteban-Vasallo, M.I.R. Gardupo, M.A.L. Prez, M.F. Domnguez-Berjn, J.A. Mochales, og G.D. Trabajo. «Community transmission of pandemic influenza (H1N1) 2009 from school outbreaks in the Madrid region, Spain. May-June 2009 [Transmision comunitaria de gripe pandmica (H1N1) 2009 a partir de brotes en centros escolares de la comunidad de Madrid. Mayo-Junio de 2009]». *Revista Espanola de Salud Publica* 84, nr. 5 (2010): 609-621.

Rodriguez-Rodriguez, A., L. Martel-Monagas, og A. Lopez-Rodriguez. «Enhancing the communication flow between alzheimer patients, caregivers, and neuropsychologists». *Advances in Experimental Medicine and Biology* 680 (2010): 601-607.

Roeger, L.S., R.L. Reed, og B.P. Smith. «Equity of access in the spatial distribution of GPs within an Australian metropolitan city». *Australian Journal of Primary Health* 16, nr. 4 (2010): 284-290.

Roemmich, J.N.a b, L.H.a c Epstein, S.d Raja, L.d Yin, J.a Robinson, og D.a Winiewicz. «Association of access to parks and recreational facilities with the physical activity of young children». *Preventive Medicine* 43, nr. 6 (2006): 437-441.

Roemmich, J.N.a c, L.H.a Epstein, S.b Raja, og L.b Yin. «The neighborhood and home environments: Disparate relationships with physical activity and sedentary behaviors in youth». *Annals of Behavioral Medicine* 33, nr. 1 (2007): 29-38.

Rogers, D.J.a, A.J.a Wilson, S.I.a b Hay, og A.J.a Graham. «The Global Distribution of Yellow Fever and Dengue». *Advances in Parasitology* 62 (2006): 181-220.

Rolfhamre, P.a, K.a Grabowska, og K.a b Ekdahl. «Implementing a public web based GIS service for feedback surveillance data on communicable diseases in Sweden». *BMC Infectious Diseases* 4 (2004).  
<http://www.scopus.com/inward/record.url?eid=2-s2.0-10444239194&partnerID=40&md5=2122dc37da83690d73525e5f32e68cf5>.

Rosa-Freitas, M.G.a, P.b Tsouris, A.c Sibajev, E.T.b de Souza Weimann, A.b Ubirajara Marques, R.b Lopes Ferreira, og J.F.c Luitgards-Moura. «Exploratory temporal and spatial distribution analysis of dengue notifications in Boa Vista, Roraima, Brazilian Amazon, 1999-2001». *Dengue Bulletin* 27 (2003): 63-80.

Rotela, C.H.a, L.I.b Spinsanti, M.A.a Lamfri, M.S.b Contigiani, W.R.c Almiron, og C.M.a Scavuzzo. «Mapping environmental susceptibility to Saint Louis encephalitis virus, based on a decision tree model of remotelysensed data». *Geospatial Health* 6, nr. 1 (2011): 85-94.

Roth, L.H.a b c g, K.d Criss, X.e Stewart, og K.f McCann. «Preplink: A novel web-based tool for healthcare emergency planning and response». *Biosecurity and Bioterrorism* 7, nr. 1 (2009): 85-92.

Rothman, L.a, M.a Slater, C.b Meaney, og A.a Howard. «Motor vehicle and pedestrian collisions: Burden of severe injury on major versus neighborhood roads». *Traffic Injury Prevention* 11, nr. 1 (2010): 43-47.

Rudavsky, R.a, og A.b c Mehrotra. «Sociodemographic characteristics of communities served by retail clinics». *Journal of the American Board of Family Medicine* 23, nr. 1 (2010): 42-48.

Ruiz, M.O.a, og D.b Remmert. «A local department of public health and the geospatial data infrastructure». *Journal of Medical Systems* 28, nr. 4 (2004): 385-395.

Rushton, G. «Public health, GIS, and spatial analytic tools». *Annual Review of Public Health* 24 (2003): 43-56.

Rushton, G.a, I.b Peleg, A.c Banerjee, G.a Smith, og M.d West. «Analyzing geographic patterns of disease incidence: Rates of late-stage colorectal cancer in Iowa». *Journal of Medical Systems* 28, nr. 3 (2004): 223-236.

Ryan, K., P. Norris, og G. Becket. «Capturing data on medicines usage: The potential of community pharmacy databases». *New Zealand Medical Journal* 118, nr. 1223 (2005). <http://www.scopus.com/inward/record.url?eid=2-s2.0-27744461696&partnerID=40&md5=80d0bfdb7708c183263ace7074667e99>.

Saelens, B. E., og J. F. Sallis. «Neighborhood walkability and the walking behavior of Australian adults». *Am J Prev Med* 33, nr. 5 (2007): 387-395.

SAIKKU, P., T. MANNI, P. KOSKELA, og T. NYGREN. «Epidemiology of Sindbis virus infections in Finland 1981-96: possible factors explaining a peculiar disease pattern» (2002). <http://journals.cambridge.org/production/action/cjoGetFulltext?fulltextid=123998>.

Samadder, S.R. «Impact of arsenic pollution on spatial distribution of human development index». *KSCE Journal of Civil Engineering* 15, nr. 6 (2011): 975-982.

Samadder, S.R.a, P.a Ziegler, T.M.b Murphy, og N.M.a Holden. «Spatial distribution of risk factors for *Cryptosporidium* Spp. transport in an Irish catchment». *Water Environment Research* 82, nr. 8 (2010): 750-758.

Saman, D.M.a, O.b Arevalo, og A.O.c Johnson. «The dental workforce in Kentucky: Current status and future needs». *Journal of Public Health Dentistry* 70, nr. 3 (2010): 188-196.

Sanchez, L.a, J.b Cortinas, O.a Pelaez, H.a Gutierrez, D.a Concepcion, og P.c Van Der Stuyft. «Breteau Index threshold levels indicating risk for dengue transmission in areas with low *Aedes* infestation». *Tropical Medicine and International Health* 15, nr. 2 (2010): 173-175.

Santana, K.S.O.a, M.E.a Bavia, A.D.b Lima, I.C.S.c Guimaries, E.S.d Soares, M.M.N.a Silva, J.d Mendonça, og M.a de Santana Martin. «Patial distribution of triatomines (Reduviidae: Triatominae) in urban areas of the city of salvador, Bahia, Brazil». *Geospatial Health* 5, nr. 2 (2011): 199-203.

Sarma, B. «Extension of modern healthcare infrastructure of major cities to the rural areas using GIS- a pilot study for Indian condition». *I 29th Asian Conference on Remote Sensing 2008, ACRS 2008*, 2:955-960, 2008. <http://www.scopus.com/inward/record.url?eid=2-s2.0-84865649529&partnerID=40&md5=d7e605a9c7a60b3e905844531c47a5fb>.

Sasaki, S., A. J. Comber, H. Suzuki, C. Brunson, og others. «Using genetic algorithms to optimise current and future health planning-the example of ambulance locations». *International journal of health geographics* 9, nr. 4 (2010). <http://www.biomedcentral.com/content/pdf/1476-072X-9-4.pdf>.

Sasaki, S.a, A.J.b Comber, H.a Suzuki, og C.b Brunson. «Using genetic algorithms to optimise current and future health planning - the example of ambulance locations». *International Journal of Health Geographics* 9 (2010). <http://www.scopus.com/inward/record.url?eid=2-s2.0-77649100988&partnerID=40&md5=e113dc817522db2f709f2d01bb072ce6>.

Sasaki, S.a, K.b Igarashi, Y.c Fujino, A.J.d Comber, C.d Brunson, C.M.e Muleya, og H.b Suzuki. «The impact of community-based outreach immunisation services on immunisation coverage with GIS network accessibility analysis in peri-urban areas, Zambia». *Journal of Epidemiology and Community Health* 65, nr. 12 (2011): 1171-1178.

Schlundt, D.G.a d, M.K.b Hargreaves, og L.c McClellan. «Geographic clustering of obesity, diabetes, and hypertension in Nashville, Tennessee». *Journal of Ambulatory Care Management* 29, nr. 2 (2006): 125-132.

Schlundt, D.G.a, C.b Mushi, C.O.c Larson, og M.d Marrs. «Use of innovative technologies in the evaluation of Nashville's REACH 2010 community action

plan: Reducing disparities in cardiovascular disease and diabetes in the African American community». *Journal of Ambulatory Care Management* 24, nr. 3 (2001): 51-60.

Schootman, M., D.A. Sterling, J. Struthers, Y. Yan, T. Laboube, B. Emo, og G. Higgs. «Positional Accuracy and Geographic Bias of Four Methods of Geocoding in Epidemiologic Research». *Annals of Epidemiology* 17, nr. 6 (2007): 464-470.

Schuurman, N., N. Bell, M.S. Hameed, og R. Simons. «A model for identifying and ranking need for trauma service in nonmetropolitan regions based on injury risk and access to services.» *The Journal of trauma* 65, nr. 1 (2008): 54-62.

Schuurman, N., N. J. Bell, R. L'Heureux, og S. M. Hameed. «Modelling optimal location for pre-hospital helicopter emergency medical services». *BMC Emergency Medicine* 9, nr. 1 (2009): 6.

Schuurman, N., V.A. Crooks, og O. Amram. «A protocol for determining differences in consistency and depth of palliative care service provision across community sites». *Health and Social Care in the Community* 18, nr. 5 (2010): 537-548.

Schuurman, N., R. S. Fiedler, S. C. W. Grzybowski, og D. Grund. «Defining rational hospital catchments for non-urban areas based on travel-time». *International Journal of Health Geographics* 5, nr. 1 (2006): 43.

Schuurman, N.a b, N.a Bell, M.S.a Hameed, og R.a Simons. «A model for identifying and ranking need for trauma service in nonmetropolitan regions based on injury risk and access to services». *Journal of Trauma - Injury, Infection and Critical Care* 65, nr. 1 (2008): 54-62.

Schuurman, N.a, N.J.a Bell, R.b L'Heureux, og S.M.c Hameed. «Modelling optimal location for pre-hospital helicopter emergency medical services». *BMC Emergency Medicine* 9 (2009).

<http://www.scopus.com/inward/record.url?eid=2-s2.0-66449115561&partnerID=40&md5=7ef90751b2d44668dd68c392d5ed8d3a3>.

Schweikart, J.a, S.a Henke, B.b Masumbuko, og R.a Poppschøtz. «Development of a Geographical Information System for the monitoring of the health infrastructure in rural areas in Tanzania». *Italian Journal of Public Health* 5, nr. 4 (2008): 268-277.

Scoggins, A. «Does air pollution pose a public health problem for New Zealand?» *Australian and New Zealand Journal of Public Health* 28, nr. 1 (2004): 16-19.

Scotch, M.a, og B.a b Parmanto. «Development of SOVAT: A numerical-spatial decision support system for community health assessment research». *International Journal of Medical Informatics* 75, nr. 10-11 (2006): 771-784.

Scotch, M.a, B.a b Parmanto, og V.a Monaco. «Evaluation of SOVAT: An OLAP-GIS decision support system for community health assessment data analysis». *BMC Medical Informatics and Decision Making* 8 (2008).

<http://www.scopus.com/inward/record.url?eid=2-s2.0-46449139007&partnerID=40&md5=2c1232d0bc44fe3b48c07262fe7a6171>.

Scott, D.a, B.b Curtis, og F.O.a Twumasi. «Towards the creation of a health information system for cancer in KwaZulu-Natal, South Africa». *Health and Place* 8, nr. 4 (2002): 237-249.

Scott, M.M.a d, K.R.c Evenson, D.A.b Cohen, og C.E.c Cox. «Comparing perceived and objectively measured access to recreational facilities as predictors of physical activity in adolescent girls». *Journal of Urban Health* 84, nr. 3 (2007): 346-359.

Seguinot-Medina, S.a, og A.b Rivera-Rentas. «Risk assessment and community participation model for environmental asthma management in an elementary public school: A case study in Puerto Rico». *International Journal of Environmental Research and Public Health* 3, nr. 1 (2006): 76-85.

Sikiti, A., G. Adeoye, A. Eyamba, E. Nnoruka, P. Drameh, U.V. Amazigo, M. Noma, et al. «The achievements and challenges of the African Programme for Onchocerciasis Control (APOC)». *Annals of Tropical Medicine and Parasitology* 96, nr. SUPPL. 1 (2002): S15-S28.

Sekine, T. «Analysis of spatio-temporal stability in accessibility: A case study of ophthalmic hospitals in Matsudo City, Chiba prefecture». *Geographical Review of Japan, Series A* 76, nr. 10 (2003): 725-742.



Senkowski, A.a, M.b Colonna, og D.-J.a Bicout. «Inframunicipality distribution of lung cancer in the urban area of Grenoble [Distribution infracommunale du cancer du poumon dans l'agglomération grenobloise]». *Revue d'Epidemiologie et de Sante Publique* 56, nr. 5 (2008): 315-321.

Seo, J.-H.a, J.-H.c Leem, E.-H.a Ha, O.-J.a Kim, B.-M.a Kim, J.-Y.d Lee, H.-S.a Park, H.-C.c Kim, Y.-C.e Hong, og Y.-J.b Kim. «Population-attributable risk of low birthweight related to PM10 pollution in seven Korean cities». *Paediatric and Perinatal Epidemiology* 24, nr. 2 (2010): 140-148.

Seong, J. C., T. H. Park, J. H. Ko, S. I. Chang, M. Kim, J. B. Holt, og M. R. Mehdi. «Modeling of road traffic noise and estimated human exposure in Fulton County, Georgia, USA». *Environment international* 37, nr. 8 (2011): 1336-1341.

Seymour, J.a, J.a Cairns, A.b Wilkie, P.A.G.c Sandercock, og J.M.c Wardlaw. «Geographical access to imaging facilities for stroke patients in Scotland». *Health and Place* 12, nr. 4 (2006): 617-630.

Shaikh, M.A. «Nurses' use of global information systems for provision of outreach reproductive health services to internally displaced persons.» *Prehospital and disaster medicine?: the official journal of the National Association of EMS Physicians and the World Association for Emergency and Disaster Medicine in association with the Acute Care Foundation* 23, nr. 3 (2008): s35-38.

Shannon, G.W., og C.M. Buker. «Determining accessibility to dermatologists and teledermatology locations in Kentucky: demonstration of an innovative geographic information systems approach.» *Telemedicine journal and e-health?: the official journal of the American Telemedicine Association* 16, nr. 6 (2010): 670-677.

Shannon, K.a b, M.a b Rusch, J.a b Shoveller, D.c Alexson, K.c Gibson, og M.W.a b Tyndall. «Mapping violence and policing as an environmental-structural barrier to health service and syringe availability among substance-using women in street-level sex work». *International Journal of Drug Policy* 19, nr. 2 (2008): 140-147.

Sherman, J.E.a, og T.L.b Fetters. «Confidentiality concerns with mapping survey data in reproductive health research». *Studies in Family Planning* 38, nr. 4 (2007): 309-321.

Shiozawa, N.a, Y.b Sakaue, T.c Isaka, og M.c Makikawa. «Development of portable monitoring device with an accelerometer and GPS receiver for health management». *I IFMBE Proceedings*, 25:388-389, 2009. <http://www.scopus.com/inward/record.url?eid=2-s2.0-77949480941&partnerID=40&md5=19a1cda5acab2b224c707e3f72015212>.

Shortt, N. K., A. Moore, M. Coombes, og C. Wymer. «Defining regions for locality health care planning: a multidimensional approach». *Social science & medicine* 60, nr. 12 (2005): 2715-2727.

Siffel, C.a b e, M.J.a c Strickland, B.R.a Gardner, R.S.d Kirby, og A.a Correa. «Role of geographic information systems in birth defects surveillance and research». *Birth Defects Research Part A - Clinical and Molecular Teratology* 76, nr. 11 (2006): 825-833.

Simves, P.P., og R.M.V.R. Almeida. «Geographic accessibility to obstetric care and maternal mortality in a large metropolitan area of Brazil». *International Journal of Gynecology and Obstetrics* 112, nr. 1 (2011): 25-29.

Simoonga, C.a b, J.c Utzinger, S.d e Brooker, P.c Vounatsou, C.C.f Appleton, A.S.g h Stensgaard, A.g Olsen, og T.K.g Kristensen. «Remote sensing, geographical information system and spatial analysis for schistosomiasis epidemiology and ecology in Africa». *Parasitology* 136, nr. 13 (2009): 1683-1693.

Sivagnanam, I. «A proposal for disease mapping in general and cancer research in particular - Asking questions for health GIS implementation in Sri Lanka». *I 29th Asian Conference on Remote Sensing 2008, ACRS 2008*, 2:967-975, 2008. <http://www.scopus.com/inward/record.url?eid=2-s2.0-84865661211&partnerID=40&md5=9ef0ec641d038d95799ef5a7c52cd29e>.

Smith, R. «Dartmouth Atlas of Health Care». *BMJ* 342, nr. mar23 4 (Marts 23, 2011): d1756-d1756.

Soares, T.S.M.a, M.b do Rosário Dias de Oliveira Latorre, G.Z.c Laporta, og M.R.d Buzzar. «Spatial and seasonal analysis on leptospirosis in the municipality of São Paulo, Southeastern Brazil, 1998 to 2006 [Análise espacial e sazonal da leptospirose no município de São Paulo, SP, 1998 a 2006]». *Revista de Saude Publica* 44, nr. 2 (2010): 283-291.

Solano, P.a e, A.b Kone, A.c Garcia, B.a Sane, V.b Michel, J.F.b Michel, B.a Coulibaly, et al. «Role of patient travelling in transmission of human African trypanosomosis in a highly endemic area of Cote d'Ivoire [Representation spatiale des déplacements des malades dans un foyer de trypanosomose humaine Africaine de Cote d'Ivoire]». *Medecine Tropicale* 63, nr. 6 (2003): 577-582.

Song, W.J.a, M.K.b Cho, I.S.b Ha, og M.K.b Choi. «Healthcare system architecture, economic value, and policy models in large-scale wireless sensor networks». *Lecture Notes in Computer Science (including subseries Lecture Notes in Artificial Intelligence and Lecture Notes in Bioinformatics)* 4166 LNCS (2006): 233-246.

Song, Y.a, G.C.b Gee, Y.a Fan, og D.T.c Takeuchi. «Do physical neighborhood characteristics matter in predicting traffic stress and health outcomes?» *Transportation Research Part F: Traffic Psychology and Behaviour* 10, nr. 2 (2007): 164-176.

Soucie, J.M., S. McAlister, A. McClellan, M. Oakley, og Y. Su. «The Universal Data Collection Surveillance System for Rare Bleeding Disorders». *American Journal of Preventive Medicine* 38, nr. 4 SUPPL. (2010): S475-S481.

Sowmyanarayanan, T.V.a, A.a Mukhopadhyaya, B.P.b Gladstone, R.b Sarkar, og G.a Kang. «Investigation of a hepatitis A outbreak in children in an urban slum in Vellore, Tamil Nadu, using geographic information systems». *Indian Journal of Medical Research* 128, nr. 1 (2008): 32-37.

Spear, R.C., A. Hubbard, S. Liang, og E. Seto. «Disease transmission models for public health decision making: Toward an approach for designing intervention strategies for schistosomiasis japonica». *Environmental Health Perspectives* 110, nr. 9 (2002): 907-915.

Spence, J.C.a, N.a Cutumisu, J.b Edwards, og J.b Evans. «Influence of neighbourhood design and access to facilities on overweight among preschool children». *International Journal of Pediatric Obesity* 3, nr. 2 (2008): 109-116.

Spencer, J., og G. Angeles. «Kernel density estimation as a technique for assessing availability of health services in Nicaragua». *Health Services and Outcomes Research Methodology* 7, nr. 3 (2007): 145-157.

Spencer, J.a, og G.b Angeles. «Kernel density estimation as a technique for assessing availability of health services in Nicaragua». *Health Services and Outcomes Research Methodology* 7, nr. 3-4 (2007): 145-157.

Srivastava, A.a, B.N.a Nagpal, P.L.b Joshi, J.C.c Paliwal, og A.P.d Dash. «Identification of malaria hot spots for focused intervention in tribal state of India: A GIS based approach». *International Journal of Health Geographics* 8, nr. 1 (2009). <http://www.scopus.com/inward/record.url?eid=2-s2.0-66749122995&partnerID=40&md5=d0a02b8d95b436ea9ee8ca802f712236>.

Srivastava, A.a, B.N.a Nagpal, R.a Saxena, A.b Eapen, K.J.b Ravindran, S.K.a Subbarao, C.c Rajamanikam, M.c Palanisamy, N.L.d Kalra, og N.C.e Appavoo. «GIS based malaria information management system for urban malaria scheme in India». *Computer Methods and Programs in Biomedicine* 71, nr. 1 (2003): 63-75.

Steinle, S.a b, S.a Reis, og C.E.b Sabel. «Assessment of personal exposure to air pollutants in Scotland - An integrated approach using personal monitoring data». *I MODSIM 2011 - 19th International Congress on Modelling and Simulation - Sustaining Our Future: Understanding and Living with Uncertainty, 1831-1837, 2011*. <http://www.scopus.com/inward/record.url?eid=2-s2.0-84858804131&partnerID=40&md5=2d2cf31a6a505ce3d4056bbc4b7a8ee1>.

Steliarova-Foucher, E.a, P.b Kaatsch, B.c Lacour, V.d Pompe-Kirn, S.e Eser, A.f Miranda, A.g Danzon, A.h Ratiu, og D.M.i Parkin. «Quality, comparability and methods of analysis of data on childhood cancer in Europe (1978-1997): Report from the Automated Childhood Cancer Information System project». *European Journal of Cancer* 42, nr. 13 (2006): 1915-1951.

Stephenson, R.a d, A.b Baschieri, S.b Clements, M.b Hennink, og N.c Madise. «Contextual influences on the use of health facilities for childbirth in Africa». *American Journal of Public Health* 96, nr. 1 (2006): 84-93.

Strauss, K.a c, C.a MacLean, A.b Troy, og B.a Littenberg. «Driving distance as a barrier to glyceemic control in diabetes». *Journal of General Internal Medicine* 21, nr. 4 (2006): 378-380.

Strickland, M.J.a b, C.a c Siffel, B.R.a Gardner, A.K.d Berzen, og A.a Correa. «Quantifying geocode location error using GIS methods». *Environmental Health: A Global Access Science Source* 6 (2007). <http://www.scopus.com/inward/record.url?eid=2-s2.0-34247238748&partnerID=40&md5=38688ee61d8113ea9e2884d774815ae0>.

Stroulia, E., D. Chodos, N.M. Boers, J. Huang, P. Gburzynski, og I. Nikolaidis. «Software engineering for health education and care delivery systems: The Smart Condo Project». *I Proceedings of the 2009 ICSE Workshop on Software Engineering in Health Care, SEHC 2009, 20-28, 2009*. <http://www.scopus.com/inward/record.url?eid=2-s2.0-70349898633&partnerID=40&md5=35491f6d036500e9efd049a6245f9982>.

Stuart, B., og A. Hinde. «Assessing genitourinary medicine clinics: Does it matter where you live?» *Journal of Family Planning and Reproductive Health Care* 37, nr. 3 (2011): 152-157.

Sudhakar, S.a d, T.b Srinivas, A.c Palit, S.K.c Kar, og S.K.c Battacharya. «Mapping of risk prone areas of kala-azar (Visceral leishmaniasis) in parts of Bihar state, India: An RS and GIS approach». *Journal of Vector Borne Diseases* 43, nr. 3 (2006): 115-122.

Sugimoto, J.D.a, A.B.a Labrique, S.b Ahmad, M.b Rashid, R.D.W.a Klemm, P.a Christian, og K.P.a West Jr. «Development and management of a geographic information system for health research in a developing-country setting: A case study from Bangladesh». *Journal of Health, Population and Nutrition* 25, nr. 4 (2007): 436-447.

Sullivan, D. «Uncertainty in mapping malaria epidemiology: Implications for control». *Epidemiologic Reviews* 32, nr. 1 (2010): 175-187.

Sumner II, W.a, og M.D.b Hagen. «Variation over time in preventable hospitalization rates across counties». *Journal of the American Board of Family Medicine* 24, nr. 6 (2011): 639-646.

Sun, L.a, Q.a b Shao, Z.-Q.c Wang, D.-M.c Kang, S.-W.d Li, X.-G.d Li, F.-Z.a Xue, og J.-Z.a Wang. «Spatial structure of rodent populations and infection patterns of hantavirus in seven villages of Shandong Province from February 2006 to January 2007». *Chinese Medical Journal* 124, nr. 11 (2011): 1639-1646.

Sung, J.C.a c, L.H.a Curtis, K.A.a c d Schulman, og D.M.b Albala. «Geographic variations in the use of medical and surgical therapies for benign prostatic hyperplasia». *Journal of Urology* 175, nr. 3 (2006): 1023-1027.

Sur, D.a, M.b Ali, L.b c Von Seidlein, B.a Manna, J.L.b Deen, C.J.b Acosta, J.D.b Clemens, og S.K.a Bhattacharya. «Comparisons of predictors for typhoid and paratyphoid fever in Kolkata, India». *BMC Public Health* 7 (2007). <http://www.scopus.com/inward/record.url?eid=2-s2.0-36649038574&partnerID=40&md5=44fdd7c9056389d2c6bab63d5356d7d4>.

Susi, L., og A. K. Mascarenhas. «Using a geographical information system to map the distribution of dentists in Ohio». *The Journal of the American Dental Association* 133, nr. 5 (2002): 636-642.

Swartz, C. H., R. A. Rudel, J. R. Kachajian, og J. G. Brody. «Historical reconstruction of wastewater and land use impacts to groundwater used for public drinking water: exposure assessment using chemical data and GIS». *Journal of Exposure Science and Environmental Epidemiology* 13, nr. 5 (2003): 403-416.

Symeonakis, E.a, T.b Robinson, og N.c Drake. «GIS and multiple-criteria evaluation for the optimisation of tsetse fly eradication programmes». *Environmental Monitoring and Assessment* 124, nr. 1-3 (2007): 89-103.

Saathoff, E.a f, A.b g Olsen, J.D.c Kvalsvig, C.C.d Appleton, B.e h Sharp, og I.e h Kleinschmidt. «Ecological covariates of *Ascaris lumbricoides* infection in schoolchildren from rural KwaZulu-Natal, South Africa». *Tropical Medicine and International Health* 10, nr. 5 (2005): 412-422.

Tanjasiri, S.P.a g, J.H.b Tran, M.c d Kagawa-Singer, M.A.b Foo, H.L.e Foong, S.W.b Lee, T.-U.N.c Nguyen, J.f Rickles, og J.S.f Wang. «Exploring access to cancer control services for Asian-American and Pacific Islander communities in Southern California». *Ethnicity and Disease* 14, nr. 3 SUPPL. 1 (2004): S1-14-S1-19.

Tanser, F. «Methodology for optimising location of new primary health care facilities in rural communities: A case study in KwaZulu-Natal, South Africa». *Journal of Epidemiology and Community Health* 60, nr. 10 (2006): 846-850.

Tanser, F.a d, V.a b Hosegood, J.a Benzler, og G.a c Solarsh. «New approaches to spatially analyse primary health care usage patterns in rural South Africa». *Tropical Medicine and International Health* 6, nr. 10 (2001): 826-838.

Tanser, F.C. «The application of GIS technology to equitably distribute fieldworker workload in a large, rural South African health survey». *Tropical Medicine and International Health* 7, nr. 1 (2002): 80-90.

Taskin, H.a, M.b Karavus, P.b Ay, A.b Topuzoglu, S.b Hidiroglu, og G.a Karahan. «Radionuclide concentrations in soil and lifetime cancer risk due to gamma radioactivity in Kirklareli, Turkey». *Journal of Environmental Radioactivity* 100, nr. 1 (2009): 49-53.

Tassinari, W.S.a b c, D.C.P.b Pellegrini, C.B.P.b Sø, R.B.d Reis, A.I.d e Ko, og M.S.b Carvalho. «Detection and modelling of case clusters for urban leptospirosis». *Tropical Medicine and International Health* 13, nr. 4 (2008): 503-512.

Taylor, C.B.a b, M.c d Stevenson, S.a b Jan, B.e Liu, G.f Tall, P.M.a b f g Middleton, M.d h Fitzharris, og J.a b e Myburgh. «An investigation into the cost, coverage and activities of Helicopter Emergency Medical Services in the state of New South Wales, Australia». *Injury* 42, nr. 10 (2011): 1088-1094.

Teljeur, C., J. Barry, og A. Kelly. «The potential impact on travel times of closure and redistribution of A&E units in Ireland». *Irish Medical Journal* 97, nr. 6 (2004): 173-175.

Tempest, V.a, G.b f Higgs, K.c McDonald, R.c Iredale, T.d Bater, og J.e Gray. «A pilot study of spatial patterns in referrals to a multicentre cancer genetics service». *Community Genetics* 8, nr. 2 (2005): 73-79.

Thepanondh, S.a, og W.b Toruksa. «Proximity analysis of air pollution exposure and its potential risk». *Journal of Environmental Monitoring* 13, nr. 5 (2011): 1264-1270.

Thomas, J.C.a d e, B.A.a Levandowski, M.R.b Isler, E.a Torrone, og G.c Wilson. «Incarceration and sexually transmitted infections: A neighborhood perspective». *Journal of Urban Health* 85, nr. 1 (2008): 90-99.

Thomson, M.C.a b, og S.J.a Connor. «Environmental information systems for the control of arthropod vectors of disease». *Medical and Veterinary Entomology* 14, nr. 3 (2000): 227-244.

Thomson, M.C.a g, A.M.b Molesworth, M.H.c Djingarey, K.R.d Yameogo, F.e Belanger, og L.E.f Cuevas. «Potential of environmental models to predict meningitis epidemics in Africa». *Tropical Medicine and International Health* 11, nr. 6 (2006): 781-788.

Thomson, M.C.a, V.a Obsomer, J.b Kamgno, J.b Gardon, S.c Wanji, I.d Takougang, P.e Enyong, J.H.f Remme, D.H.a Molyneux, og M.b Boussinesq. «Mapping the distribution of Loa loa in Cameroon in support of the African Programme for Onchocerciasis Control». *Filaria Journal* 3 (2004).  
<http://www.scopus.com/inward/record.url?eid=2-s2.0-13644268138&partnerID=40&md5=7a3094dfaf22f7d14639663a9fd5bb9b>.

Thuilliez, J. «Fever, malaria and primary repetition rates amongst school children in Mali: Combining demographic and health surveys (DHS) with spatial malariological measures». *Social Science and Medicine* 71, nr. 2 (2010): 314-323.

Thwing, J.I.a, R.T.a Perry, D.A.a Townes, M.B.b Diouf, S.c Ndiaye, og M.b Thior. «Success of Senegal's first nationwide distribution of long-lasting insecticide-treated nets to children under five - Contribution toward universal coverage». *Malaria Journal* 10 (2011).

<http://www.scopus.com/inward/record.url?eid=2-s2.0-79953860796&partnerID=40&md5=1f225033533f1d49e0169417538029bc>.

Tilston, N.a b, C.a Skelly, og P.c Weinstein. «Pan-European Chikungunya surveillance: Designing risk stratified surveillance zones». *International Journal of Health Geographics* 8 (2009): 61.

Tilt, J.H.a, T.M.a Unfried, og B.b Roca. «Using objective and subjective measures of neighborhood greenness and accessible destinations for understanding walking trips and BMI in Seattle, Washington». *American Journal of Health Promotion* 21, nr. 4 SUPPL. (2007): 371-379.

Tiwari, N., C. M. S. Adhikari, A. Tewari, og V. Kandpal. «Investigation of geo-spatial hotspots for the occurrence of tuberculosis in Almora district, India, using GIS and spatial scan statistic». *International Journal of Health Geographics* 5, nr. 1 (2006): 33.

Tomlinson, C.J.a, L.b Chapman, J.E.b Thornes, og C.J.a Baker. «Including the urban heat island in spatial heat health risk assessment strategies: A case study for Birmingham, UK». *International Journal of Health Geographics* 10 (2011). <http://www.scopus.com/inward/record.url?eid=2-s2.0-79958812539&partnerID=40&md5=64dc6e83ef9d82d9bd17bb0f1e4ded40>.

Tompkins, J.W.a b, I.N.b Luginaah, G.L.c d e Booth, og S.B.a Harris. «The geography of diabetes in London, Canada: The need for local level policy for prevention and management». *International Journal of Environmental Research and Public Health* 7, nr. 5 (2010): 2407-2422.

Tondel, M., P. Lindgren, L. Hellstrøm, O. Løfman, og M. Fredrikson. «Risk of malignancies in relation to terrestrial gamma radiation in a Swedish population cohort». *Science of the Total Environment* 409, nr. 3 (2011): 471-477.

Tondel, M.a, P.a Lindgren, P.b Garvin, og B.c Persson. «Parish classification or dwelling coordinate for exposure assessment in environmental epidemiology - A comparative study using Geographical Information System». *Science of the Total Environment* 405, nr. 1-3 (2008): 324-329.

Tondel, M.a, P.a Lindgren, L.b Hellstrøm, O.c Løfman, og M.d Fredrikson. «Risk of malignancies in relation to terrestrial gamma radiation in a Swedish population cohort». *Science of the Total Environment* 409, nr. 3 (2011): 471-477.

Tong, S.a, P.b Dale, N.c Nicholls, J.S.d Mackenzie, R.e Wolff, og A.J.f McMichael. «Climate variability, social and environmental factors, and Ross River virus transmission: Research development and future research needs». *Environmental Health Perspectives* 116, nr. 12 (2008): 1591-1597.

Van Dyck, D.a b, G.b Cardon, B.a b c Deforche, N.d Owen, J.F.e Sallis, og I.b De Bourdeaudhuij. «Neighborhood Walkability and Sedentary Time in Belgian Adults». *American Journal of Preventive Medicine* 39, nr. 1 (2010): 25-32.

Toubiana, L.a, J.-B.b Richard, og P.b Landais. «Geographical information system for end-stage renal disease: SIGNe, an aid to public health decision making». *Nephrology Dialysis Transplantation* 20, nr. 2 (2005): 273-277.

Tourre, Y.M.a b, J.c Lacaux, C.d Vignolles, J.e f Ndione, og M.g Lafaye. «Mapping of zones potentially occupied by *Aedes vexans* and *Culex poicilipes* mosquitoes, the main vectors of Rift Valley fever in Senegal». *Geospatial Health* 3, nr. 1 (2008): 69-79.

Townson, H.a, M.B.b Nathan, M.b Zaim, P.b Guillet, L.c Manga, R.b Bos, og M.b Kindhauser. «Exploiting the potential of vector control for disease prevention». *Bulletin of the World Health Organization* 83, nr. 12 (2005): 942-947.

Tsai, Y.-S.a, C.-Y.b Huang, T.-H.c Wen, C.-T.a Sun, og M.-Y.d Yen. «Integrating epidemic dynamics with daily commuting networks: Building a multilayer framework to assess influenza A (H1N1) intervention policies». *Simulation* 87, nr. 5 (2011): 385-405.

Ugorji, F.O.a, A.O.b Lartey, og S.O.c Nwaneri. «Malaria surveillance with remote sensing and GIS in Owerri, Nigeria». *I International Geoscience and Remote Sensing Symposium (IGARSS)*, 4:IV829-IV832, 2009.

<http://www.scopus.com/inward/record.url?eid=2-s2.0-77951292878&partnerID=40&md5=b8bb44f82c3e499bb1684124d7fbd40e>.

Ulugtekin, N., S. Alkoy, og D. Z. Seker. «Use of a geographic information system in an epidemiological study of measles in Istanbul». *The Journal of International Medical Research* 35, nr. 1 (2007): 150-154.

Ulugtekin, N.a, S.b Alkoy, og D.Z.a Seker. «Use of a geographic information system in an epidemiological study in measles in Istanbul». *Journal of International Medical Research* 35, nr. 1 (2007): 150-154.

Utzinge, J.a b, L.c Rinaldi, J.B.d Malone, S.J.a b Krauth, T.K.e f Kristensen, G.c Cringoli, og R.g Bergquist. «Geospatial Health: The first five years». *Geospatial Health* 6, nr. 1 (2011): 137-154.

Utzinge, J.a, X.-N.b Zhou, M.-G.b Chen, og R.c Bergquist. «Conquering schistosomiasis in China: The long march». *Acta Tropica* 96, nr. 2-3 (2005): 69-96.

Vanwambeke, S.O.a, S.N.b Bennett, og D.D.c Kapan. «Spatially disaggregated disease transmission risk: Land cover, land use and risk of dengue transmission on the island of Oahu». *Tropical Medicine and International Health* 16, nr. 2 (2011): 174-185.

Vazquez-Prokopec, G.M.a, S.T.b Stoddard, V.c Paz-Soldan, A.C.b Morrison, J.P.d Elder, T.J.e Kochel, T.W.b Scott, og U.a Kitron. «Usefulness of commercially available GPS data-loggers for tracking human movement and exposure to dengue virus». *International Journal of Health Geographics* 8 (2009). <http://www.scopus.com/inward/record.url?eid=2-s2.0-72549113232&partnerID=40&md5=cd03f969ebdcf5bea5acc4bd52c4b5fa>.

Vernez Moudon, A., C. Lee, A. D. Cheadle, C. Garvin, D. B. Johnson, T. L. Schmid, og R. D. Weathers. «Attributes of environments supporting walking». *American Journal of Health Promotion* 21, nr. 5 (2007): 448-459.

Vieira, V.M.a, J.E.b c Hart, T.F.a Webster, J.d Weinberg, R.e f g Puett, F.b c h Laden, K.H.i Costenbader, og E.W.i Karlson. «Association between residences in U.S. northern latitudes and rheumatoid arthritis: A spatial analysis of the nurses' health study». *Environmental Health Perspectives* 118, nr. 7 (2010): 957-961.

Vieira, V.M.a, G.J.a b Howard, L.G.a Gallagher, og T.c Fletcher. «Geocoding rural addresses in a community contaminated by PFOA: A comparison of methods». *Environmental Health: A Global Access Science Source* 9, nr. 1 (2010). <http://www.scopus.com/inward/record.url?eid=2-s2.0-77951028898&partnerID=40&md5=8fbad399bc000771fe9bda603c1b2923>.

Vignolles, C.a, Y.M.b c Tourre, O.d Mora, L.a Imanache, og M.a Lafaye. «TerraSAR-X high-resolution radar remote sensing: An operational warning system for Rift Valley fever risk». *Geospatial Health* 5, nr. 1 (2010): 23-31.

Vivier, P. M., M. Hauptman, S. H. Weitzen, S. Bell, D. N. Quilliam, og J. R. Logan. «The Important Health Impact of Where a Child Lives: Neighborhood Characteristics and the Burden of Lead Poisoning». *Maternal and child health journal* 15, nr. 8 (2011): 1195-1202.

Volk, H.E.a, I.b Hertz-Picciotto, L.b Delwiche, F.c Lurmann, og R.d McConnell. «Residential proximity to freeways and autism in the CHARGE study». *Environmental Health Perspectives* 119, nr. 6 (2011): 873-877.

Wagner, S. E., J. B. Burch, M. Bottai, R. Puett, D. Porter, S. Bolick-Aldrich, T. Temples, R. C. Wilkerson, J. E. Vena, og J. R. Hibert. «Groundwater uranium and cancer incidence in South Carolina». *Cancer Causes and Control* 22, nr. 1 (2011): 41-50.

Wahlgren, L., og P. Schantz. «Bikeability and methodological issues using the active commuting route environment scale (ACRES) in a metropolitan setting». *BMC Medical Research Methodology* 11 (2011). <http://www.scopus.com/inward/record.url?eid=2-s2.0-78651387895&partnerID=40&md5=170e50ea713898b4f29684f521658dc6>.

Waller, L.A. «A Civil Action and statistical assessments of the spatial pattern of disease: Do we have a cluster?» *Regulatory Toxicology and Pharmacology* 32, nr. 2 (2000): 174-183.

Walsh, S. J., og L. M. DeChello. «Geographical variation in mortality from systemic lupus erythematosus in the United States». *Lupus* 10, nr. 9 (2001): 637-646.

Wang, C.a b, X.a b Li, L.c Dai, G.a b Zhang, L.a b Gao, og Q.d Zhao. «Analysis of lung cancer gender differences and age structure in the high

prevalence areas of Xiamen». I ICSDM 2011 - Proceedings 2011 IEEE International Conference on Spatial Data Mining and Geographical Knowledge Services, 154-159, 2011. <http://www.scopus.com/inward/record.url?eid=2-s2.0-80052123669&partnerID=40&md5=db9fae319fc7d58d50bef32d0a8037b0>.

Wang, F., og W. Luo. «Assessing spatial and nonspatial factors for healthcare access: Towards an integrated approach to defining health professional shortage areas». *Health and Place* 11, nr. 2 (2005): 131-146.

Wang, J., J. Xiong, K. Yang, S. Peng, og Q. Xu. «Use of GIS and agent-based modeling to simulate the spread of influenza». I 2010 18th International Conference on Geoinformatics, *Geoinformatics* 2010, 2010. <http://www.scopus.com/inward/record.url?eid=2-s2.0-77958024085&partnerID=40&md5=153ebdefaa8288c1626b5544ba2d6c23>.

Wang, J.F., B. Meng, X.Y. Zheng, J.Y. Liu, W.G. Han, J.L. Wu, X.H. Liu, X.W. Li, og X.M. Song. «Analysis on the multi-distribution and the major influencing factors on severe acute respiratory syndrome in Beijing». *Zhonghua liu xing bing xue za zhi = Zhonghua liuxingbingxue zazhi* 26, nr. 3 (2005): 164-168.

Wang, L. «Immigration, ethnicity, and accessibility to culturally diverse family physicians». *Health and Place* 13, nr. 3 (2007): 656-671.

Wang, M. C., S. Kim, A. A. Gonzalez, K. E. MacLeod, og M. A. Winkleby. «Socioeconomic and food-related physical characteristics of the neighbourhood environment are associated with body mass index». *Journal of Epidemiology and Community Health* 61, nr. 6 (2007): 491-498.

Wang, Q., J. Wu, Y. Dong, og J. Wang. «Ontology-based design and information sharing for medical information». I Proceedings 2010 IEEE International Conference on Software Engineering and Service Sciences, ICSESS 2010, 663-666, 2010. <http://www.scopus.com/inward/record.url?eid=2-s2.0-77957847661&partnerID=40&md5=7fb9878330e3f7caf78229f1fc23b9>.

Wang, X.-H.a, X.-N.a Zhou, P.b Vounatsou, Z.c Chen, J.b Utzinger, K.a d Yang, P.b Steinmann, og X.-H.a Wu. «Bayesian spatio-temporal modeling of *Schistosoma japonicum* prevalence data in the absence of a diagnostic 'gold' standard». *PLoS Neglected Tropical Diseases* 2, nr. 6 (2008). <http://www.scopus.com/inward/record.url?eid=2-s2.0-48949118064&partnerID=40&md5=a10d18a246ceelf7da154ad4716a8da2>.

Wang, Y., J. Gulliver, og C. McHugh. «Modeling the health impacts of air pollution exposures in London within the GENESIS system». I *Water Resource and Environmental Protection (ISWREP)*, 2011 International Symposium on, 3:2341-2344, 2011. [http://ieeexplore.ieee.org/xpls/abs\\_all.jsp?arnumber=5893737](http://ieeexplore.ieee.org/xpls/abs_all.jsp?arnumber=5893737).

Wang, Y.a, J.b Gulliver, og C.c McHugh. «Modeling the health impacts of air pollution exposures in London within the GENESIS system». I *ISWREP 2011 - Proceedings of 2011 International Symposium on Water Resource and Environmental Protection*, 3:2341-2344, 2011. <http://www.scopus.com/inward/record.url?eid=2-s2.0-79960712123&partnerID=40&md5=a6ae2330cd4fdlacddb061bde663de57>.

Wang, Z., og C. Lee. «Site and neighborhood environments for walking among older adults». *Health & place* 16, nr. 6 (2010): 1268-1279.

Ward, M.H.a, J.R.b d Nuckols, S.J.b Weigel, S.K.c Maxwell, K.P.a Cantor, og R.S.b Miller. «Identifying populations potentially exposed to agricultural pesticides using remote sensing and a geographic information system». *Environmental Health Perspectives* 108, nr. 1 (2000): 5-12.

Waring, S.a, A.a Zakos-Feliberti, R.b Wood, M.c Stone, P.a Padgett, og R.d Arafat. «The utility of geographic information systems (GIS) in rapid epidemiological assessments following weather-related disasters: Methodological issues based on the Tropical Storm Allison experience». *International Journal of Hygiene and Environmental Health* 208, nr. 1-2 (2005): 109-116.

Wartenberg, D., M. Greenberg, og R. Lathrop. «Identification and characterization of populations living near high-voltage transmission lines: a pilot study.» *Environmental Health Perspectives* 101, nr. 7 (1993): 626.

Wartenberg, D. «Screening for lead exposure using a geographic information system». *Environmental Research* 59, nr. 2 (1992): 310-317.

Washington, C.H.a, J.b Radday, T.G.a Streit, H.A.b Boyd, M.J.b Beach, D.G.b Addiss, R.c Lovince, et al. «Spatial clustering of filarial transmission before and after a Mass Drug Administration in a setting of low infection prevalence». *Filaria Journal* 3 (2004).  
<http://www.scopus.com/inward/record.url?eid=2-s2.0-2942514522&partnerID=40&md5=d82f6df6f14c4d69e6c438e71094fce0>.

Watson, M., og A.L. Dannenberg. «Investment in safe routes to school projects: public health benefits for the larger community.» *Preventing chronic disease* 5, nr. 3 (2008): A90.

Wellie, O.a, H.b Duhme, U.a Streit, E.c Von Mutius, U.b Keil, og S.K.b Weiland. «Application of Geographical Information Systems (GIS) in epidemiological studies using the example of the ISAAC Study Munich [Der einsatz von Geoinformationssystemen (GIS) in epidemiologischen studien dargestellt am beispiel der ISAAC-Studie Munchen]». *Gesundheitswesen* 62, nr. 8-9 (2000): 423-430.

Wen, T.-H.a b, N.H.b Lin, D.-Y.b c Chao, K.-P.d e Hwang, C.-C.f Kan, K.C.-M.g Lin, J.T.-S.b Wu, S.Y.-J.g Huang, I.-C.h Fan, og C.-C.b King. «Spatial-temporal patterns of dengue in areas at risk of dengue hemorrhagic fever in Kaohsiung, Taiwan, 2002». *International Journal of Infectious Diseases* 14, nr. 4 (2010): e334-e343.

Wey, C.L.a, J.b Griesse, L.b Kightlinger, og M.C.a Wimberly. «Geographic variability in geocoding success for West Nile virus cases in South Dakota». *Health and Place* 15, nr. 4 (2009): 1108-1114.

Wheeler, A.J.a, M.a Smith-Doiron, X.b Xu, N.L.a Gilbert, og J.R.c Brook. «Intra-urban variability of air pollution in Windsor, Ontario-Measurement and modeling for human exposure assessment». *Environmental Research* 106, nr. 1 (2008): 7-16.

White, D.A.a d, R.J.e Anderson, G.a Bradnock, M.M.b Gray, og P.c Jenkins. «The use of a geographical information system in investigating dental services». *Community Dental Health* 17, nr. 2 (2000): 79-84.

White, P., V. James, D. Ansell, V. Lodhi, og K. L. Donovan. «Equity of access to dialysis facilities in Wales». *Qjm* 99, nr. 7 (2006): 445-452.

White, P.a, V.a James, D.b Ansell, V.c Lodhi, og K.L.c Donovan. «Equity of access to dialysis facilities in Wales». *QJM* 99, nr. 7 (2006): 445-452.

Whitsel, E.A.a b e, K.M.b Rose, J.L.b Wood, A.C.c Henley, D.d Liao, og G.b Heiss. «Accuracy and repeatability of commercial geocoding». *American Journal of Epidemiology* 160, nr. 10 (2004): 1023-1029.

Whyatt, J. D., C. Pooley, P. Coulton, M. Moser, W. Bamford, og G. Davies. «Estimating personal exposure to air pollution on the journey to and from school using GPS, GIS and mobile phone technology». *11th International Conference on Harmonisation within Atmospheric Dispersion Modelling for Regulatory Purposes*, 1:2-5, 2007.  
[http://www.harmo.org/conferences/Proceedings/\\_Cambridge/publishedSections/Op081-086.pdf](http://www.harmo.org/conferences/Proceedings/_Cambridge/publishedSections/Op081-086.pdf).

Wickremasinghe, A.R.a d, D.M.b Gunawardena, og S.T.C.c Mahawithanage. «Use of routinely collected past surveillance data in identifying and mapping high-risk areas in a malaria endemic area of Sri Lanka». *Southeast Asian Journal of Tropical Medicine and Public Health* 33, nr. 4 (2002): 678-684.

Wilhelm, M., Y. Y. Meng, R. P. Rull, P. English, J. Balmes, og B. Ritz. «Environmental public health tracking of childhood asthma using California health interview survey, traffic, and outdoor air pollution data». *Environmental health perspectives* 116, nr. 9 (2008): 1254.

Wilhelm, M.a, Y.-Y.b Meng, R.P.c g Rull, P.d English, J.e f Balmes, og B.a Ritz. «Environmental public health tracking of childhood asthma using California health interview survey, traffic, and outdoor air pollution data». *Environmental Health Perspectives* 116, nr. 9 (2008): 1254-1260.

Wilson, D.K.a e, K.A.b Kirtland, B.E.c Ainsworth, og C.L.d Addy. «Socioeconomic status and perceptions of access and safety for physical activity». *Annals of Behavioral Medicine* 28, nr. 1 (2004): 20-28.

Wilson, M.L. «Emerging and vector-borne diseases: Role of high spatial resolution and hyperspectral images in analyses and forecasts». *Journal of Geographical Systems* 4, nr. 1 (2002): 31-42.



Wilson, S.a, M.a Booth, F.M.a Jones, J.K.b Mwatha, G.b Kimani, H.C.c Curtis, B.J.d Vennervald, J.H.e Ouma, E.c Muchiri, og D.W.a Dunne. «Age-adjusted Plasmodium falciparum antibody levels in school-aged children are a stable marker of microgeographical variations in exposure to Plasmodium infection». BMC Infectious Diseases 7 (2007).  
<http://www.scopus.com/inward/record.url?eid=2-s2.0-34547995575&partnerID=40&md5=bb38a97407064b8478326c5111f71272>.

Wong, N.S.a, S.S.a Lee, og H.b Lin. «Assessing the spatial distribution of methadone clinic clients and their access to treatment». Harm Reduction Journal 7 (2010). <http://www.scopus.com/inward/record.url?eid=2-s2.0-77954170293&partnerID=40&md5=2f28765bdc796649756b834a5e5187ac>.

Wood, D.J., D. Clark, og A.C. Gatrell. «Equity of access to adult hospice inpatient care within north-west England». Palliative Medicine 18, nr. 6 (2004): 543-549.

Worringham, C., A. Rojek, og I. Stewart. «Development and feasibility of a smartphone, ECG and GPS based system for remotely monitoring exercise in cardiac rehabilitation». PLoS One 6, nr. 2 (2011): e14669.

Wright, J.A.a, og C.b Polack. «Understanding variation in measles-mumps-rubella immunization coverage - A population-based study». European Journal of Public Health 16, nr. 2 (2006): 137-142.

Wright Willis, A., B. A. Evanoff, M. Lian, S. R. Criswell, og B. A. Racette. «Geographic and ethnic variation in Parkinson disease: a population-based study of US Medicare beneficiaries». Neuroepidemiology 34, nr. 3 (2010): 143-151.

Wu, P. C., J. G. Lay, H. R. Guo, C. Y. Lin, S. C. Lung, og H. J. Su. «Higher temperature and urbanization affect the spatial patterns of dengue fever transmission in subtropical Taiwan». Science of the total environment 407, nr. 7 (2009): 2224-2233.

Wu, P. C., C. Y. Lin, S. C. Lung, H. R. Guo, C. H. Chou, og H. J. Su. «Cardiovascular mortality during heat and cold events: determinants of regional vulnerability in Taiwan». Occupational and environmental medicine 68, nr. 7 (2011): 525-530.

Wu, P.-C.a c, J.-G.b Lay, H.-R.c Guo, C.-Y.d Lin, S.-C.d Lung, og H.-J.c Su. «Higher temperature and urbanization affect the spatial patterns of dengue fever transmission in subtropical Taiwan». Science of the Total Environment 407, nr. 7 (2009): 2224-2233.

Wu, P.-C.a, C.-Y.b Lin, S.-C.b Lung, H.-R.c Guo, C.-H.d Chou, og H.-J.c Su. «Cardiovascular mortality during heat and cold events: Determinants of regional vulnerability in Taiwan». Occupational and Environmental Medicine 68, nr. 7 (2011): 525-530.

Wu, Y. C., P. F. Chen, Z. H. Hu, C. H. Chang, G. C. Lee, og W. C. Yu. «A mobile health monitoring system using RFID ring-type pulse sensor». I Dependable, Autonomic and Secure Computing, 2009. DASC'09. Eighth IEEE International Conference on, 317-322, 2009.  
[http://ieeexplore.ieee.org/xpls/abs\\_all.jsp?arnumber=5380551](http://ieeexplore.ieee.org/xpls/abs_all.jsp?arnumber=5380551).

Wu, Y.-C.a, P.-F.b Chen, Z.-A.c Hu, C.-H.d Chang, G.-C.c Lee, og W.-C.e Yu. «A mobile health monitoring system using RFID ring-type pulse sensor». I 8th IEEE International Symposium on Dependable, Autonomic and Secure Computing, DASC 2009, 317-322, 2009.  
<http://www.scopus.com/inward/record.url?eid=2-s2.0-77950583928&partnerID=40&md5=9b1dd709830893812be56b10cdc80913>.

Wu, Y.-C.a, og P.-F.b Chen. «Multi-channel data-acquisition and controller for mobile health monitoring system with HSDPA and GPS». I 2nd International Conference on the Applications of Digital Information and Web Technologies, ICADIWT 2009, 227-231, 2009.  
<http://www.scopus.com/inward/record.url?eid=2-s2.0-71449089953&partnerID=40&md5=1b0d8804410e9ecd56e2c28e4254e8b7>.

Wu, Y.-C.a, W.-H.a Hsu, P.-F.b Chen, Z.-H.c Hu, C.-H.d Chang, og W.-C.e Yu. «A mobile e-health-management system». Journal of Technology 26, nr. 2 (2011): 133-141.

Xiang, H., J.R. Nuckols, og L. Stallones. «A geographic information assessment of birth weight and crop production patterns around mother's residence». Environmental Research 82, nr. 2 (2000): 160-167.

Xu, B.a b, P.a c Gong, E.d Seto, S.d Liang, C.e Yang, S.e Wen, D.e Qiu, X.e Gu, og R.d Spear. «A spatial-temporal model for assessing the effects of intervillage connectivity in schistosomiasis transmission». *Annals of the Association of American Geographers* 96, nr. 1 (2006): 31-46.

Xu, J.Z.a b, C.a c Wang, Y.a d Hu, A.a e Croitoru, og V.a f Tao. «A web-based risk assessment system and service for child safety: The case of mid-town Toronto». *Geomatica* 59, nr. 2 (2005): 149-158.

Xue, Z.a, M.a Gebremichael, R.a Ahmad, M.L.b Weldu, og A.C.a Bagtzoglou. «Impact of temperature and precipitation on propagation of intestinal schistosomiasis in an irrigated region in Ethiopia: Suitability of satellite datasets». *Tropical Medicine and International Health* 16, nr. 9 (2011): 1104-1111.

Yamashita, T., og S.R. Kunkel. «The association between heart disease mortality and geographic access to hospitals: County level comparisons in Ohio, USA». *Social Science and Medicine* 70, nr. 8 (2010): 1211-1218.

Yamauchi, K., W. Chen, og D. Wei. «A study on Japanese mobile phone market and its applications». I *Proceedings - The Fourth International Conference on Computer and Information Technology (CIT 2004)*, 875-878, 2004. <http://www.scopus.com/inward/record.url?eid=2-s2.0-9744253838&partnerID=40&md5=76d91c4b7d7be46alac0966fc8826d6f>.

Yang, D. H., R. Goerge, og R. Mullner. «Comparing GIS-based methods of measuring spatial accessibility to health services». *Journal of Medical Systems* 30, nr. 1 (2006): 23-32.

Yang, D.-H.a, R.a Goerge, og R.b Mullner. «Comparing GIS-based methods of measuring spatial accessibility to health services». *Journal of Medical Systems* 30, nr. 1 (2006): 23-32.

Yang, G. J., P. Vounatsou, Z. Xiao-Nong, J. Utzinger, og M. Tanner. «A review of geographic information system and remote sensing with applications to the epidemiology and control of schistosomiasis in China». *Acta tropica* 96, nr. 2 (2005): 117-129.

Yang, G.-J.a b, P.b Vounatsou, X.-N.c Zhou, M.b Tanner, og J.b Utzinger. «A Bayesian-based approach for spatio-temporal modeling of county level prevalence of *Schistosoma japonicum* infection in Jiangsu province, China». *International Journal for Parasitology* 35, nr. 2 (2005): 155-162.

Yang, G.-J.a b, P.b Vounatsou, X.-N.c Zhou, J.b Utzinger, og M.b Tanner. «A review of geographic information system and remote sensing with applications to the epidemiology and control of schistosomiasis in China». *Acta Tropica* 96, nr. 2-3 (2005): 117-129.

Yang, G.-J.a, Q.a Gao, S.-S.b Zhou, J.B.c Malone, J.C.c McCarroll, M.d e Tanner, P.d e Vounatsou, R.f Bergquist, J.d e Utzinger, og X.-N.b Zhou. «Mapping and predicting malaria transmission in the People's Republic of China, using integrated biology-driven and statistical models». *Geospatial Health* 5, nr. 1 (2010): 11-22.

Yang, K., H. Luo, S. Peng, og Q. Xu. «A study on spatial decision support systems for HIV/AIDS prevention based on COM GIS technology». I *Proceedings of SPIE - The International Society for Optical Engineering*. Bd. 6754, 2007. <http://www.scopus.com/inward/record.url?eid=2-s2.0-36248962738&partnerID=40&md5=cbebec5545db8d7203c0e7f836068a3e>.

Yang, K.a b, X.-H.a Wang, G.-J.b Yang, X.-H.a Wu, Y.-L.c Qi, H.-J.c Li, og X.-N.a Zhou. «An integrated approach to identify distribution of *Oncomelania hupensis*, the intermediate host of *Schistosoma japonicum*, in a mountainous region in China». *International Journal for Parasitology* 38, nr. 8-9 (2008): 1007-1016.

Yang, K.a b, X.-N.b Zhou, W.-A.a Yan, D.-R.a Hang, og P.c Steinmann. «Landfills in Jiangsu province, China, and potential threats for public health: Leachate appraisal and spatial analysis using geographic information system and remote sensing». *Waste Management* 28, nr. 12 (2008): 2750-2757.

Yao, X., H. Zhang, S. Han, og B. Zheng. «The application of GIS technique for groundwater exploration in the severe endemic disease districts». I *Proceedings - 2010 3rd IEEE International Conference on Computer Science and Information Technology, ICCSIT 2010*, 8:593-596, 2010.

<http://www.scopus.com/inward/record.url?eid=2-s2.0-77958535411&partnerID=40&md5=d7bf17ec88bd9570b3aaecef12f4f52>.

Yiannakoulis, N.W.a, og L.W.a b c d Svenson. «West Nile virus: Strategies for predicting municipal-level infection». *Annals of the New York Academy of Sciences* 1102 (2007): 135-148.

Yomralioglu, T.a, E.H.b Colak, og A.C.a Aydinoglu. «Geo-relationship between cancer cases and the environment by GIS: A case study of Trabzon in Turkey». *International Journal of Environmental Research and Public Health* 6, nr. 12 (2009): 3190-3204.

Yoshioka, K.a, D.a Tercero, B.a Perez, og E.b Lugo. «Rhodnius prolixus in nicaragua: Geographical distribution, control, and surveillance, 1998-2009 [Rhodnius prolixus en nicaragua: Distribucion geografica, control y vigilancia entre 1998 y 2009]». *Revista Panamericana de Salud Publica/Pan American Journal of Public Health* 30, nr. 5 (2011): 439-444.

Yu, W.a, D.b Cowper, M.c Berger, M.d Kuebeler, J.e Kubal, og L.f Manheim. «Using GIS to profile health-care costs of VA quality-enhancement research initiative diseases». *Journal of Medical Systems* 28, nr. 3 (2004): 271-285.

Zandbergen, P. A. «Geocoding quality and implications for spatial analysis». *Geography Compass* 3, nr. 2 (2009): 647-680.

Zander, A.a, A.b Niggebrugge, D.c Pencheon, og G.a Lyratzopoulos. «Changes in travel-related carbon emissions associated with modernization of services for patients with acute myocardial infarction: A case study». *Journal of Public Health* 33, nr. 2 (2011): 272-279.

Zeng, W.a, X.b Liu, X.c Cui, H.d Cui, og P.e Wang. «Remote sensing and GIS for identifying and monitoring the environmental factors associated with vector-borne disease: An overview». I *International Geoscience and Remote Sensing Symposium (IGARSS)*, 1443-1446, 2006.

<http://www.scopus.com/inward/record.url?eid=2-s2.0-34948902189&partnerID=40&md5=4d98c461a90f93b52b63c817b0d35853>.

Zenk, S.N.a, E.b Tarlov, og J.c Sun. «Spatial equity in facilities providing low- or no-fee screening mammography in Chicago neighborhoods». *Journal of Urban Health* 83, nr. 2 (2006): 195-210.

ZHAI, L.a b, X.a LIAO, T.a CHEN, X.a YAN, H.a XIE, B.a WU, og L.a WANG. «Regional assessment of cadmium pollution in agricultural lands and the potential health risk related to intensive mining activities: A case study in Chenzhou City, China». *Journal of Environmental Sciences* 20, nr. 6 (2008): 696-703.

Zhan, F.B., J.D. Brender, I. DE Lima, L. Suarez, og P.H. Langlois. «Match Rate and Positional Accuracy of Two Geocoding Methods for Epidemiologic Research». *Annals of Epidemiology* 16, nr. 11 (2006): 842-849.

Zhan, F.B., Y. Lu, A. Giordano, og E.J. Hanford. «Geographic information system (GIS) as a tool for disease surveillance and environmental health research». I *2005 International Conference on Services Systems and Services Management, Proceedings of ICSSSM'05*, 2:1465-1470, 2005.

<http://www.scopus.com/inward/record.url?eid=2-s2.0-33745256017&partnerID=40&md5=0ae16d0f377577bd98ddf262f6e60bda>.

Zhan, Q.a, X.a Wang, og R.b Sliuzas. «A GIS-based method to assess the shortage areas of community health service - Case study in Wuhan, China». I *2011 International Conference on Remote Sensing, Environment and Transportation Engineering, RSETE 2011 - Proceedings*, 5654-5657, 2011.

<http://www.scopus.com/inward/record.url?eid=2-s2.0-80052195101&partnerID=40&md5=ec4affb0e3b75fade4ecd825c4716b46>.

Zhang, A., Q. Qi, og L. Jiang. «Design and implementation of a web-based disease control and emergency response system on CNGI for Mekong subregion». I *ICSDM 2011 - Proceedings 2011 IEEE International Conference on Spatial Data Mining and Geographical Knowledge Services*, 263-266, 2011.

<http://www.scopus.com/inward/record.url?eid=2-s2.0-80052117088&partnerID=40&md5=645806ca90151859bf3d1e1155825a5f>.

Zhang, C. «Using multivariate analyses and GIS to identify pollutants and their spatial patterns in urban soils in Galway, Ireland». *Environmental Pollution* 142, nr. 3 (2006): 501-511.

Zhang, J., og H. Shi. «Geo-visualization and clustering to support epidemiology surveillance exploration». I *Proceedings - 2010 Digital Image*

Computing: Techniques and Applications, DICTA 2010, 381-386, 2010.  
<http://www.scopus.com/inward/record.url?eid=2-s2.0-79951604503&partnerID=40&md5=ac31906a57a63eec60004e6a9245c87c>.

Zhang, W., Q. Chen, H. McCubbin, L. McCubbin, og S. Foley. «Predictors of mental and physical health: Individual and neighborhood levels of education, social well-being, and ethnicity». *Health & Place* 17, nr. 1 (2011): 238-247.

Zhang, W.a, Q.b Chen, H.c McCubbin, L.d McCubbin, og S.c Foley. «Predictors of mental and physical health: Individual and neighborhood levels of education, social well-being, and ethnicity». *Health and Place* 17, nr. 1 (2011): 238-247.

Zhang, Z.a, T.E.b Carpenter, Y.c Chen, A.B.d Clark, H.S.e Lynn, W.a Peng, Y.a Zhou, G.a Zhao, og Q.a Jiang. «Identifying high-risk regions for schistosomiasis in Guichi, China: A spatial analysis». *Acta Tropica* 107, nr. 3 (2008): 217-223.

Zhang, Z.J.a b, T.E.c Carpenter, H.S.d Lynn, Y.e Chen, R.f Bivand, A.B.g Clark, F.M.h Hui, et al. «Location of active transmission sites of *Schistosoma japonicum* in lake and marshland regions in China». *Parasitology* 136, nr. 7 (2009): 737-746.

Zhen, Z.a, J.-M.a Jin, og F.b Liu. «The application of geographic information system (GIS) in the field of public health». I 2010 2nd IITA International Conference on Geoscience and Remote Sensing, IITA-GRS 2010, 2:442-445, 2010. <http://www.scopus.com/inward/record.url?eid=2-s2.0-78349277724&partnerID=40&md5=e47c575b0812222aefcfc63f57071e0e>.

Zhi-Hang, P., C. Yue-Jia, K. H. Reilly, W. Lu, Q. Qian-Qian, D. Zheng-Wei, D. Guo-Wei, et al. «Spatial distribution of HIV/AIDS in Yunnan province, People's Republic of China». *Geospatial Health* 5, nr. 2 (2011): 177-182.

Zhong, S.a, G.b Lan, H.b Zhu, R.b Wen, Q.b Zhao, og Q.a Huang. «The application of GIS and RS for epidemics: A case study of the spread of highly pathogenic avian influenza in China in 2004-2005». I Proceedings of SPIE - The International Society for Optical Engineering. Bd. 7285, 2008. <http://www.scopus.com/inward/record.url?eid=2-s2.0-60649103866&partnerID=40&md5=6012e917aaf9f39678013b3b5c4e62ea>.

Zhou, X. N., K. Yang, Q. B. Hong, L. P. Sun, G. J. Yang, Y. S. Liang, og Y. X. Huang. «Prediction of the impact of climate warming on transmission of schistosomiasis in China].» *Zhongguo ji sheng chong xue yu ji sheng chong bing za zhi= Chinese journal of parasitology & parasitic diseases* 22, nr. 5 (2004): 262.

Zhou, X., L. Sun, Q. Jiang, J. Guo, T. Wang, D. Lin, G. Yang, et al. «Geographic information systems spatial analysis on transmission of schistosomiasis in China». *Zhonghua liu xing bing xue za zhi = Zhonghua liuxingbingxue zazhi* 21, nr. 4 (2000): 261-263.

Zhou, X.N.a, J.B.b Malone, T.K.c Kristensen, og N.R.d Bergquist. «Application of geographic information systems and remote sensing to schistosomiasis control in China». *Acta Tropica* 79, nr. 1 (2001): 97-106.

Zhou, Y., og J.I. Levy. «Factors influencing the spatial extent of mobile source air pollution impacts: A meta-analysis». *BMC Public Health* 7 (2007). <http://www.scopus.com/inward/record.url?eid=2-s2.0-34250219921&partnerID=40&md5=10c4059ccl1f925acdac1cd6df0a28d80>.

Zhu, L.a, B.P.a Carlin, P.b English, og R.b Scalf. «Hierarchical modeling of spatio-temporally misaligned data: Relating traffic density to pediatric asthma hospitalizations». *Environmetrics* 11, nr. 1 (2000): 43-61.

Zhu, X.a, og C.b Lee. «Walkability and Safety Around Elementary Schools. Economic and Ethnic Disparities». *American Journal of Preventive Medicine* 34, nr. 4 (2008): 282-290.

Ziari, H., og M. M. Khabiri. «Applied GIS software for improving pedestrian & bicycle safety». *Transport* 20, nr. 4 (2005): 160-164.

Zimmerman, D. L., J. Li, og X. Fang. «Spatial autocorrelation among automated geocoding errors and its effects on testing for disease clustering». *Statistics in medicine* 29, nr. 9 (2010): 1025-1036.

Zimmerman, D.L. «Estimating the intensity of a spatial point process from locations coarsened by incomplete geocoding». *Biometrics* 64, nr. 1 (2008): 262-270.

Zimmerman, D.L., X. Fang, og S. Mazumdar. «Spatial clustering of the failure to geocode and its implications for the detection of disease clustering». *Statistics in Medicine* 27, nr. 21 (2008): 4254-4266.

Zimmerman, D.L.a, J.b Li, og X.c Fang. «Spatial autocorrelation among automated geocoding errors and its effects on testing for disease clustering». *Statistics in Medicine* 29, nr. 9 (2010): 1025-1036.

Zinszer, K., C. Jauvin, A. Verma, L. Bedard, R. Allard, K. Schwartzman, L. de Montigny, K. Charland, og D. L. Buckeridge. «Residential address errors in public health surveillance data: A description and analysis of the impact on geocoding». *Spatial and Spatio-temporal Epidemiology* 1, nr. 2 (2010): 163-168.

Zlotnick, C.a b. «Community- versus individual-level indicators to identify pediatric health care need». *Journal of Urban Health* 84, nr. 1 (2007): 45-59.

Zulian, G., V. Donisi, G. Secco, R. Pertile, M. Tansella, og F. Amaddeo. «How are caseload and service utilisation of psychiatric services influenced by distance? A geographical approach to the study of community-based mental health services». *Social psychiatry and psychiatric epidemiology* 46, nr. 9 (2011): 881-891.

Zulian, G.a, V.a Donisi, G.b Secco, R.a Pertile, M.a Tansella, og F.a Amaddeo. «How are caseload and service utilisation of psychiatric services influenced by distance? A geographical approach to the study of community-based mental health services». *Social Psychiatry and Psychiatric Epidemiology* 46, nr. 9 (2011): 881-891.

Zuo, S. Q., L. Q. Fang, L. Zhan, P. H. Zhang, J. F. Jiang, L. P. Wang, J. Q. Ma, et al. «Geo-spatial hotspots of hemorrhagic fever with renal syndrome and genetic characterization of seoul variants in Beijing, China». *PLoS neglected tropical diseases* 5, nr. 1 (2011): e945.

Flvingson, C., N. Hallberg, T. Timpka, og K. Lindqvist. «Requirements Engineering for inter-organizational health information systems with functions for spatial analyses: Modeling a WHO safe community applying Use Case Maps». *Methods of Information in Medicine* 41, nr. 4 (2002): 299-304.

Flvingson, C.a, J.a b Hallberg, T.a c Timpka, og K.a c Lindqvist. «Ethical issues in public health informatics: Implications for system design when sharing geographic information». *Journal of Biomedical Informatics* 35, nr. 3 (2002): 178-185.
